# 1 Bayesian Modeling Reveals Ultrasensitivity Underlying 2 Metabolic Compensation in the Cyanobacterial Circadian 3 Clock

4 Lu Hong<sup>1</sup>, Danylo O Lavrentovich<sup>2,†</sup>, Archana Chavan<sup>3</sup>, Eugene Leypunskiy<sup>1</sup>, Eileen Li<sup>4</sup>,  
Charles Matthews<sup>4,‡</sup>, Andy LiWang<sup>3,5,6,7,8,9</sup>, Michael J Rust<sup>10,11,12,\*</sup> & Aaron R Dinner<sup>2,11,13,\*</sup>

- 5 1. Graduate Program in Biophysical Sciences, University of Chicago, Chicago, IL 60637, USA
- 6 2. Department of Chemistry, University of Chicago, Chicago, IL 60637, USA
- 7 3. School of Natural Sciences, University of California, Merced, CA 95343, USA
- 8 4. Department of Statistics, University of Chicago, Chicago, IL 60637, USA
- 9 5. Quantitative and Systems Biology, University of California, Merced, CA 95343, USA
- 10 6. Center for Circadian Biology, University of California, San Diego, La Jolla, CA 92093, USA
- 11 7. Chemistry and Chemical Biology, University of California, Merced, CA 95343, USA
- 12 8. Health Sciences Research Institute, University of California, Merced, CA 95343, USA
- 13 9. Center for Cellular and Biomolecular Machines, University of California, Merced, CA 95343, USA
- 14 10. Department of Molecular Genetics and Cell Biology, University of Chicago, Chicago, IL 60637, USA
- 15 11. Institute for Biophysical Dynamics, University of Chicago, Chicago, IL 60637, USA
- 16 12. Institute for Genomics and Systems Biology, University of Chicago, Chicago, Illinois 60637, USA
- 17 13. James Franck Institute, University of Chicago, Chicago, IL 60637, USA

18 \*Corresponding Authors: [mrust@uchicago.edu](mailto:mrust@uchicago.edu) (MJR), [dinner@uchicago.edu](mailto:dinner@uchicago.edu) (ARD)

19 †Current address: Department of Organismic and Evolutionary Biology, Harvard University, Cambridge, MA  
20 02138, USA

21 ‡Current address: School of Mathematics, University of Edinburgh, Edinburgh, EH9 3FD, UK

22 Keywords: Bayes factor/kinetic modeling/Markov chain Monte Carlo/robustness/substrate competition

23 Running Title: Bayesian modeling reveals ultrasensitivity

## 24 **Abstract**

25 Mathematical models can enable a predictive understanding of mechanism in cell biology by quantitatively  
26 describing complex networks of interactions, but such models are often poorly constrained by available  
27 data. Owing to its relative biochemical simplicity, the core circadian oscillator in *Synechococcus elongatus*  
28 has become a prototypical system for studying how collective dynamics emerge from molecular interac-  
29 tions. The oscillator consists of only three proteins, KaiA, KaiB, and KaiC, and near-24-h cycles of KaiC phos-  
30 phosphorylation can be reconstituted in vitro. Here, we formulate a molecularly-detailed but mechanistically  
31 agnostic model of the KaiA-KaiC subsystem and fit it directly to experimental data within a Bayesian pa-  
32 rameter estimation framework. Analysis of the fits consistently reveals an ultrasensitive response for KaiC  
33 phosphorylation as a function of KaiA concentration, which we confirm experimentally. This ultrasensitivity  
34 primarily results from the differential affinity of KaiA for competing nucleotide-bound states of KaiC. We ar-  
35 gue that the ultrasensitive stimulus-response relation is critical to metabolic compensation by suppressing  
36 premature phosphorylation at nighttime.

## 37 **Synopsis**

38 This study takes a data-driven kinetic modeling approach to characterizing the interaction between KaiA and  
39 KaiC in the cyanobacterial circadian oscillator and understanding how the oscillator responds to changes in  
40 cellular metabolic conditions.

- 41 • An extensive dataset of KaiC autophosphorylation measurements was gathered and fit to a detailed  
42 yet mechanistically agnostic kinetic model within a Bayesian parameter estimation framework.
- 43 • KaiA concentration tunes the sensitivity of KaiC autophosphorylation and the period of the full oscil-  
44 lator to %ATP.
- 45 • The model reveals an ultrasensitive dependence of KaiC phosphorylation on KaiA concentration as a  
46 result of differential KaiA binding affinity to ADP- vs. ATP-bound KaiC.
- 47 • Ultrasensitivity in KaiC phosphorylation contributes to metabolic compensation by suppressing pre-  
48 mature phosphorylation at nighttime.

## 49 Introduction

50 Achieving a predictive understanding of biological systems and chemical reaction networks is challenging  
51 because complex behavior can emerge from even a small number of interacting components. Classic ex-  
52 amples include the propagation of action potentials in neurobiology and chemical oscillators such as the  
53 Belousov-Zhabotinsky reaction. The collective dynamics in such systems cannot be easily intuited through  
54 qualitative reasoning alone, and thus mathematical modeling has long played an important role in summa-  
55 rizing and interpreting existing observations and formulating testable, quantitative hypotheses.

56 In general, mathematical modeling can be classified as either “forward” or “reverse.” In forward mod-  
57 eling, known interactions are expressed mathematically, which allows a researcher to draw out the logical  
58 implications of the model and its underlying assumptions (Gunawardena, 2014). In reverse modeling, exper-  
59 imental data are used to infer unknown interactions through a statistical approach (Villaverde and Banga,  
60 2014). Many forward modeling studies are highly phenomenological; such studies excel in showing how  
61 effects like feedback (Novák and Tyson, 2008) and ultrasensitivity (Ferrell and Ha, 2014a,b) can give rise to  
62 collective dynamics, including bistable switching, oscillation, and adaptation (Ma et al., 2009). The simplic-  
63 ity of this class of models, however, makes quantitative prediction and experimental verification difficult.  
64 Reverse modeling, on the other hand, has found success in untangling complex interactions in -omic data  
65 (Machado et al., 2011; Wu et al., 2017) and signaling pathways such as the eukaryotic circadian clock (Forger  
66 and Peskin, 2003) and the JAK2/STAT5 signaling pathway (Hug et al., 2013). However, the complexity of  
67 such models raises issues of identifiability, i.e., whether a model topology and/or parameter values can be  
68 uniquely determined given the input data (Bellman and Åström, 1970; Cobelli and DiStefano, 1980). Fur-  
69 thermore, the nonlinear dynamics typical of such models give rise to non-convex optimization problems  
70 that pose significant technical and computational challenges.

71 The circadian clock from the cyanobacterial species *Synechococcus elongatus* PCC 7942 (Johnson et al.,  
72 2011) represents a unique opportunity to combine elements of both forward and reverse modeling. The  
73 core oscillator is post-translational (Tomita et al., 2005) and consists of just three proteins: KaiA, KaiB, and  
74 KaiC. A stable rhythm in KaiC phosphorylation with a period of nearly 24-h emerges spontaneously from  
75 these components, driven by KaiA-dependent autokinase reactions followed by a KaiB-mediated delayed  
76 negative feedback loop that favors dephosphorylation. The phosphorylation cycle can be reconstituted  
77 in vitro while still retaining the hallmarks of circadian rhythms in living organisms (Nakajima et al., 2005;  
78 Yoshida et al., 2009; Rust et al., 2011; Leypunskiy et al., 2017). Previous work has clearly articulated the  
79 basic biochemical events in the phosphorylation cycle (Johnson et al., 2011; Swan et al., 2018), allowing  
80 specification of a model topology with few ambiguities.

81 Despite the apparent simplicity of the system, the dynamics of the Kai oscillator are sufficiently complex  
82 that reverse modeling can provide useful insights. KaiC molecules can exist in multiple phosphorylation  
83 states and nucleotide-bound states, and how these states affect KaiC’s interaction with KaiA (Mori et al.,  
84 2018) and KaiB (Phong et al., 2013; Lin et al., 2014) is not fully understood. A related unresolved issue is the  
85 effect of the solution nucleotide pool (ATP and ADP) on the oscillator. In *S. elongatus*, the day/night cycle is  
86 reflected in the cellular metabolic state, including changes in the adenylate nucleotide pool %ATP (defined  
87 as  $100\% \frac{[ATP]}{[ATP] + [ADP]}$ ), which acts as a timing cue and plays an important role in controlling the  
88 amplitude and phase of the phosphorylation cycle (Rust et al., 2011; Phong et al., 2013; Leypunskiy et al.,  
89 2017). KaiC is an ATPase (Terauchi et al., 2007) and phosphotransferase (Nishiwaki and Kondo, 2012), and its  
90 activities are regulated by which nucleotides are bound. The nucleotide-bound state is in turn regulated by  
91 KaiA, which acts as a nucleotide-exchange factor (Nishiwaki-Ohkawa et al., 2014). The kinetics of nucleotide  
92 exchange, the affinities of KaiC for nucleotides, and the heterogeneity of nucleotide-bound states in the  
93 KaiC hexamer have been measured (Nishiwaki-Ohkawa et al., 2014; Abe et al., 2015), but it is experimentally  
94 challenging to monitor all of the relevant quantities simultaneously over the course of the cycle.

95 Here we take a data-driven Bayesian modeling approach (**Figure 1A**) to elucidate the regulatory rela-  
96 tions between KaiA, nucleotides in solution, KaiC phosphorylation, and KaiC nucleotide-bound state, with  
97 the goal of deducing dynamical rules that can predict the behavior of the system. The resulting model

98 does not include KaiB; it focuses on describing the dynamics of phosphorylation during the daytime part of  
99 the clock cycle. To provide a training set for this model, we collected kinetic time series characterizing the  
100 metabolic sensitivity of the KaiC phosphorylation kinetics (in the absence of KaiB) over a wide range of KaiA  
101 concentrations ( $[KaiA]$ ) and %ATP. Although such data do not give us direct access to all relevant states of  
102 the KaiA-KaiC subsystem, they place constraints on the underlying molecular interactions. Bayesian param-  
103 eter estimation (Mackay and Kay, 2003) has been used to systematically quantify parameter uncertainties  
104 and compare models in many fields (Geweke, 1989; Wasserman, 2000; Hou et al., 2012), including systems  
105 biology (Flaherty et al., 2008; Klinke, 2009; Toni Tina et al., 2009; Xu et al., 2010; Schmidl et al., 2012; Eydgahi  
106 et al., 2013; Pullen and Morris, 2014; Mello et al., 2018). Here it allows us to estimate parameter values,  
107 quantify the importance of specific model elements, and make mechanistic predictions from the model.

108 The Markov chain Monte Carlo (MCMC) sampling method that we use to fit the model to the data yields  
109 an ensemble of parameter sets, rather than a single best fit. We find that, even with extensive training  
110 data, many microscopic parameters in the model are not tightly constrained and their values vary widely  
111 across the ensemble of fits. Despite this, we show that this ensemble of fits robustly makes predictions  
112 that are borne out in experimental tests (Brown and Sethna, 2003; Gutenkunst et al., 2007). In particu-  
113 lar, the model reveals an ultrasensitive dependence of phosphorylation on the concentration of KaiA, with  
114 strong nonlinearity at low  $[KaiA]$ , conditions that likely apply near the nighttime to daytime transition point,  
115 when a large fraction of KaiA molecules are inhibited. The ultrasensitive response primarily arises from  
116 a differential affinity of KaiA for different nucleotide-bound states of KaiC. This mechanism is analogous  
117 to substrate competition (Ferrell and Ha, 2014b), where kinetic competition of multiple enzyme substrates  
118 leads to ultrasensitivity.

119 Lastly, we consider the implications of these results for the full oscillator, in which KaiC rhythmically  
120 switches between phosphorylation and dephosphorylation. Incorporation of the ultrasensitive response  
121 to KaiA into a mathematical model of the full oscillator suggests that this effect both stabilizes the period  
122 against changes in the nucleotide pool and allows oscillations to persist even when KaiB binds KaiA relatively  
123 weakly. Consistent with this prediction, we find that a substantial amount of KaiA is not bound by KaiB even  
124 when the clock is dephosphorylating. These results shed new light on metabolic compensation, a property  
125 that allows robust 24-h oscillation in spite of changes in %ATP conditions (Johnson and Egly, 2014). Taken  
126 together, our results show how the Bayesian framework combined with extensive training data can be used  
127 to discover unanticipated mechanisms and direct experimental investigations.

## 128 Results

### 129 A molecularly motivated model of KaiA-KaiC dynamics

130 To probe the response of KaiC phosphorylation to a wide range of metabolic conditions, we made kinetic  
131 measurements of KaiC phosphorylation at three %ATP conditions and six [KaiA] conditions while holding  
132 the KaiC concentration constant (**Figure 1B**). KaiC is a homohexamer and each subunit has two domains,  
133 termed CI and CII. Both CI and CII domains have ATPase activity (Hayashi et al., 2003; Pattanayek et al., 2004;  
134 Terauchi et al., 2007), while the CII domain is in addition a bidirectional phosphotransferase (Nishiwaki and  
135 Kondo, 2012; Egli et al., 2012) with two phosphorylation sites (Xu et al., 2004; Rust et al., 2007; Nishiwaki  
136 et al., 2007). Each KaiC subunit thus has four phosphoforms: the unphosphorylated (U), phosphoserine-  
137 431 (S), phosphothreonine-432 (T), and doubly phosphorylated (D) states. The measurement resolves the  
138 kinetics of all four KaiC phosphoforms.

139 Our strategy is to fit these data with a model of the KaiC catalytic cycle with a minimum of simplifying  
140 assumptions. To this end, we formulate a model based on mass action kinetics. We explicitly keep track  
141 of three properties of the CII domain of each KaiC subunit: its phosphorylation status (right superscripts  
142 in **Figure 1C**), nucleotide-bound state (right subscript), and whether or not KaiA is bound (left superscript).  
143 We do not consider CI or the hexameric nature of KaiC explicitly (see **SI** for further discussion). There are  
144 thus 16 possible KaiC states, 8 of which are shown in **Figure 1C**, along with the phosphotransfer, nucleotide  
145 exchange, KaiA (un)binding, and hydrolysis reactions that connect the states (see **Figure S1A** for the full  
146 model structure). We also hypothesized that nucleotides might interact directly with KaiA, which could  
147 allow KaiA's activity to directly depend on nucleotides in solution. However, we did not detect any direct  
148 interaction between KaiA and ATP or ADP using NMR spectroscopy, so we do not allow for this scenario in  
149 the model (**Figure S2**). Below, we step through the four classes of reactions that we include; further details  
150 can be found in Materials and Methods.

151 **Phosphotransfer** KaiC is a bidirectional phosphotransferase (Egli et al., 2012; Nishiwaki and Kondo, 2012),  
152 which means that it can transfer a  $\gamma$ -phosphate group from a bound ATP to a phosphorylation site, but unlike  
153 a typical phosphatase, it regenerates ATP from ADP during dephosphorylation, i.e.,

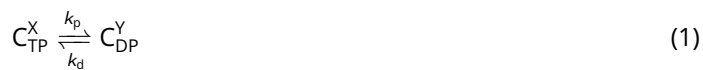

154 where  $(X, Y) \in \{(U, T), (U, S), (T, D), (S, D)\}$ . This mechanism implies that the nucleotide-bound state of KaiC  
155 has a significant impact on the direction of its phosphotransferase activity: an ATP-bound KaiC presumably  
156 cannot dephosphorylate, and an ADP-bound KaiC cannot phosphorylate.

157 **Nucleotide exchange** KaiA binding to the CII domain (Kim et al., 2008; Pattanayek and Egli, 2015) stim-  
158 ulates KaiC autophosphorylation (Iwasaki et al., 2002; Williams et al., 2002; Kageyama et al., 2006). Recent  
159 work has shown that KaiA can bind to KaiC and act as a nucleotide-exchange factor (Nishiwaki-Ohkawa  
160 et al., 2014) by facilitating conformational changes at the subunit interface that promote solvent exposure  
161 of the nucleotide-binding pocket (Hong et al., 2018). It is currently unclear whether this nucleotide exchange  
162 activity is responsible for all of KaiA's effect on KaiC or whether it alters the KaiC catalytic cycle in other ways  
163 (see **SI** for further analysis of this issue). The reversible binding of KaiA

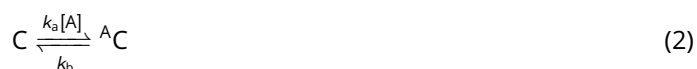

164 contributes two classes of rate constants,  $k_a$  and  $k_b$ .

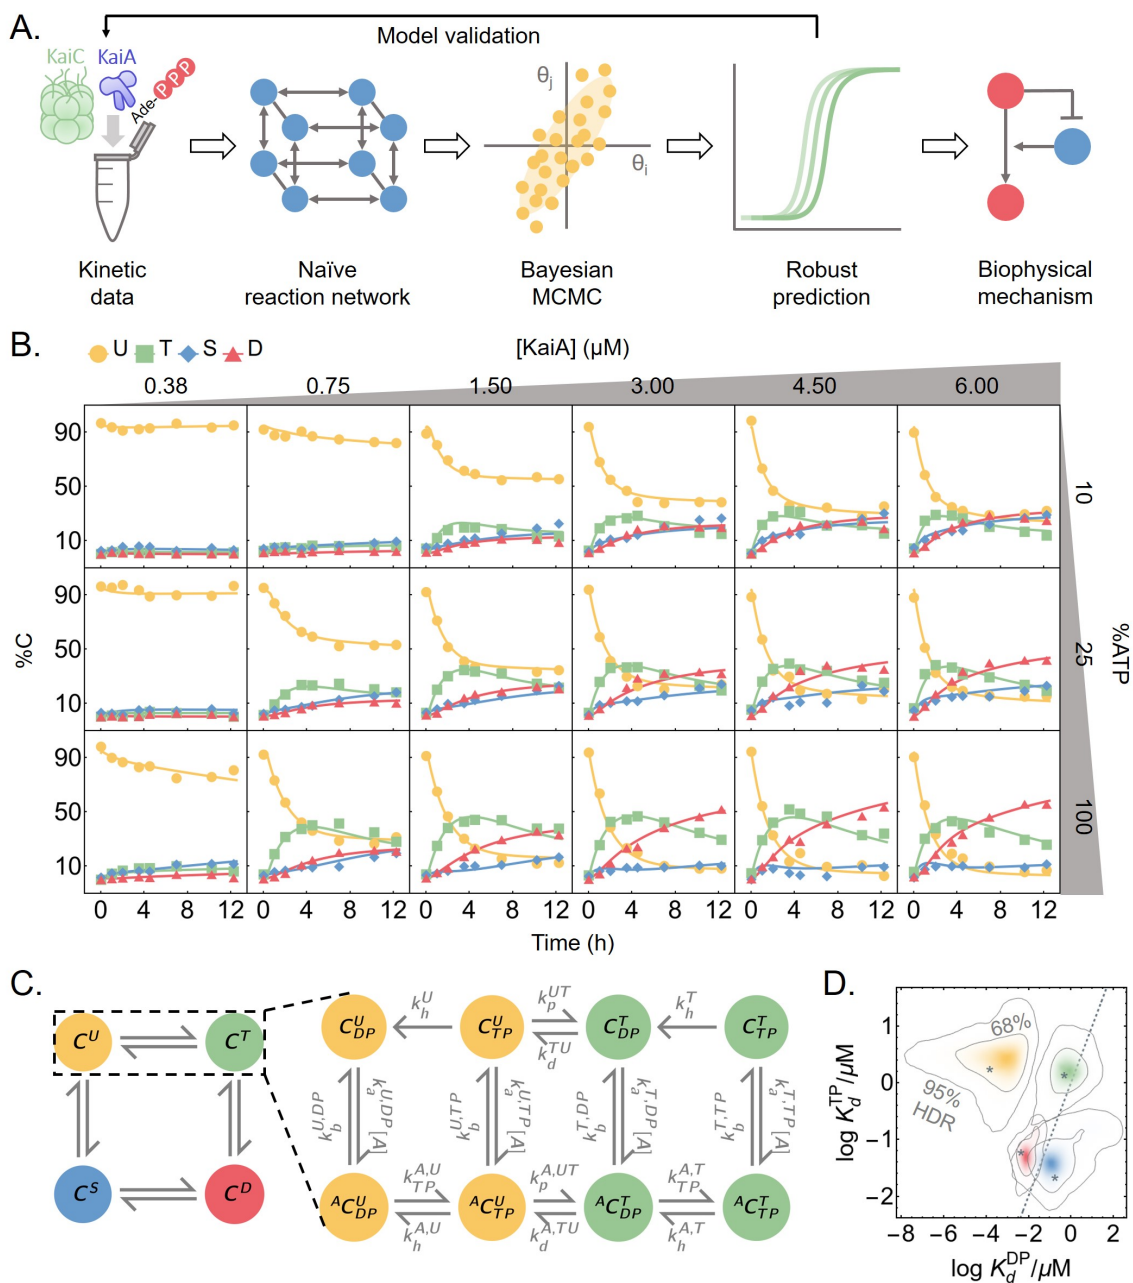

**Figure 1:** Phosphorylation data are fit by a mechanistically agnostic kinetic model. A) An outline of the data-driven Bayesian model fitting approach employed in this work. B) To constrain the model, measurements of KaiC phosphorylation kinetics were collected at six [KaiA] and three %ATP conditions. The curves represent the best fit model prediction. C) A schematic of the mass action kinetics model. The model elaborates on the autophosphorylation reactions of KaiC by explicitly keeping track of the time evolution of the KaiC phosphoforms, nucleotide-bound states, and KaiA binding mediated by phosphotransfer, nucleotide exchange, and ATP hydrolysis. Note that the KaiA binding reactions are second-order, but KaiA concentration ( $[A]$ ) is written as part of the effective first-order rate constant. See the main text for a discussion of the state and rate constant nomenclature and **Figure S1A** for a schematic of the full model. D) The posterior distributions for  $\log K_d^{TP}/\mu\text{M}$  (base 10). The horizontal axis represents the affinity for ADP-bound KaiC, and the vertical axis represents the affinity for ATP-bound KaiC; the four colors correspond to the KaiC phosphoforms, as in panel C. The asterisks represent the best fit, and the contour lines represent the 95% and 68% highest posterior density regions (HDR). The dashed line represents the  $K_d^{TP} = K_d^{DP}$  line, so that densities above the line indicate higher affinity for the ADP-bound species and densities below the line indicate higher affinity for the ATP-bound species.

165 Because the CII domain of KaiC releases its bound nucleotide very slowly in the absence of KaiA (Nishiwaki-  
166 Ohkawa et al., 2014), we ignore the possibility of KaiA-independent nucleotide exchange in the model. Un-  
167 der the assumptions that i) the apo state is in a quasi-steady state, ii) the ADP and ATP on-rates are identical,  
168 and iii) ATP release is slow, nucleotide exchange can be modeled as a one-step reaction

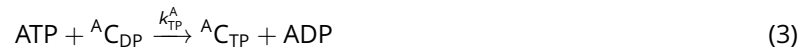

169 where

$$k_{\text{TP}}^A = k_r^{\text{DP}} \frac{[\text{ATP}]}{[\text{ATP}] + [\text{ADP}]} \quad (4)$$

170 and  $k_r^{\text{DP}}$  is the ADP dissociation rate constant. Nucleotide exchange thus contributes one class of rate  
171 constant,  $k_r^{\text{DP}}$ . See Materials and Methods for the derivation of (4).

172 **ATP hydrolysis** Finally, we allow for irreversible ATP hydrolysis in the CII domain

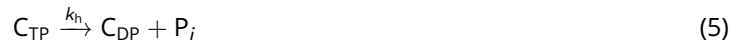

173 which contributes one class of rate constants,  $k_{\text{h}}$ . Because each KaiC molecule consumes relatively little ATP  
174 on the timescale of a day (Terauchi et al., 2007), we assume the solution ATP and ADP concentrations are  
175 constant.

176 **Species-dependent rates** Given the six classes of rate constants,  $k_p$ ,  $k_d$ ,  $k_a$ ,  $k_b$ ,  $k_r^{\text{DP}}$ , and  $k_{\text{h}}$ , we make the  
177 model maximally general, or mechanistically agnostic, by allowing each rate constant to potentially depend  
178 on the specific molecular state involved in the reaction. For example, the KaiA dissociation rate constant is  
179 allowed to vary depending on the nucleotide-bound state and phosphoform background of KaiC, and thus  
180 the dissociation rate constants for the ADP-bound U ( $k_b^{\text{U,DP}}$ ) and ATP-bound T phosphoforms ( $k_b^{\text{T,TP}}$ ) are two  
181 independent model parameters. In this way, the parameter fitting and model comparison procedures auto-  
182 matically test specific biochemical hypotheses about the functions of KaiA and KaiC. For example, allowing  
183 the KaiA off-rates to depend on the nucleotide-bound states is equivalent to the hypothesis that KaiA has  
184 different dwell times for ATP- versus ADP-bound states of KaiC. In fact, because each reaction has an inde-  
185 pendent rate constant, except for the thermodynamic constraints of detailed balance, the fitting procedure  
186 effectively allows for simultaneous testing of all possible two-way interactions of the three categories of  
187 KaiC properties, without a priori preference for any particular mechanism.

## 188 The data constrain the parameters to widely varying degrees

189 We estimate the model parameters through a Bayesian framework. In this framework, we maximize the  
190 posterior probability, which is proportional to the product of the prior distribution and the likelihood func-  
191 tion. Here, we interpret the prior as representing subjective beliefs on the model parameters before exper-  
192 imental inputs, while the likelihood function quantifies the goodness of fit. Bayesian parameter estimation  
193 reduces to least-squares fitting under the assumption of normally distributed residuals and uniform pri-  
194 ors. In practice, we find that direct numerical optimization of the posterior usually results in fits that are  
195 trapped in low probability local maxima (**Figure S3B**). Thus we instead draw parameters from the prior  
196 distribution and then use a heuristic combination of Markov chain Monte Carlo (MCMC) sampling and op-  
197 timization (Powell's algorithm) to explore the parameter space. The MCMC method that we use (Goodman  
198 and Weare, 2010; Foreman-Mackey et al., 2013) efficiently searches the parameter space by simulating an  
199 ensemble of parameter sets in parallel; the spread of the ensemble reflects the geometry of the posterior  
200 distribution and is used to guide the directions of Monte Carlo moves. See Materials and Methods for a  
201 more mathematical treatment of the fitting procedure and comparison of different numerical optimization  
202 and sampling methods.

203 We use this approach to fit the phosphorylation data (**Figure 1B**) together with previously published  
204 data on dephosphorylation (Rust et al., 2011), ATP hydrolysis rate (Terauchi et al., 2007), and the KaiA dwell  
205 time for each KaiC phosphoform (Kageyama et al., 2006; Mori et al., 2018) (see Materials and Methods).  
206 Overall, the model achieves excellent agreement with the training data (**Figure 1B** and **Figure S4A–C**). In  
207 the following analyses, we refer to model predictions using the best fit parameter values, and quantify  
208 the uncertainties using the posterior distribution (see **SI** for further discussion on the convergence of the  
209 simulation).

210 We find that certain parameters, such as the hydrolysis rates in the U and T phosphoforms and the  
211 KaiA off-rates from the U phosphoform, are tightly constrained, while many others, mainly involving S and  
212 D phosphoforms, are less constrained, in the sense that their posterior distributions span multiple or-  
213 ders of magnitude, exhibit multimodality, or cannot be reproduced over multiple independent runs (**Figure**  
214 **S1B**). Some parameters are highly correlated and certain combinations of the parameters are much better  
215 constrained than the individual parameters. For example, the posterior distributions for the KaiA binding  
216 affinities (**Figure 1D**) appear better constrained than the on/off rates (**Figure S5B**).

217 Taken together, these results are consistent with the notion that collective fits of multiparameter mod-  
218 els are generally “sloppy,” meaning that the sensitivities of different combinations of parameters can range  
219 over orders of magnitude with no obvious gaps in the spectrum (Brown and Sethna, 2003; Gutenkunst et al.,  
220 2007). As we will see, we can nonetheless make useful predictions using the ensemble of model paramete-  
221 ters, because the model behavior is constrained along the stiffest directions of the posterior distribution.  
222 By contrast, direct parameter measurements need to be both complete and precise to achieve similar pre-  
223 dictive validity (Gutenkunst et al., 2007). We further characterize the structure of the parameter space in **SI**  
224 and **Figure S5**.

## 225 KaiC (de)phosphorylation goes through transient kinetic intermediates

226 Given the model, we can interpret the underlying molecular events in KaiC phosphorylation. Here we con-  
227 sider the phosphorylation kinetics at the standard reaction condition (3.5  $\mu\text{M}$  KaiC, 1.5  $\mu\text{M}$  KaiA, 100% ATP;  
228 **Figure 2A** and B, solid curves); we examine the effect of varying [KaiA] and %ATP in the following sections.  
229 At the beginning of the phosphorylation reaction, KaiC molecules are predominantly in the ADP-bound U  
230 state ( $C_{DP}^U$ ), the end product of the dephosphorylation pathway in the absence of KaiA (**Figure 2A**). With the  
231 addition of KaiA, the  $C_{DP}^U$  state becomes rapidly depleted within the first 10 minutes of the reaction and  
232 enters the  $C_{TP}^U$  state. Consistent with the kinetic ordering observed in the full oscillator, the  $C_{TP}^U$  population  
233 is primarily converted into the T phosphoform over the S phosphoform. The exact pathway underlying the  
234 preference for the T phosphoform is not well constrained by the data, but it appears to be the result of  
235 more than just a difference in the relative  $U \rightarrow T$  and  $U \rightarrow S$  phosphorylation rates; there is an interplay be-  
236 tween KaiC phosphorylation and KaiA (un)binding kinetics (see **SI** and **Figure S6**). The ADP- and KaiA-bound  
237 T phosphoform species are unstable kinetic intermediates, and the population accumulates at the  $C_{TP}^T$  bot-  
238 tleneck for the first 4 hours. As phosphorylation reaches completion, the T phosphoform is converted first  
239 into  $^A C_{TP}^D$  through the unstable ADP-bound intermediates, and then to the  $C_{TP}^D$  state; the populations of the  
240  $^A C_{TP}^D$  and  $C_{TP}^D$  states are comparable at steady state. We note here, however, that previous measurements  
241 indicate that approximately 30% of CII nucleotide-binding pockets should be ADP-bound in the presence  
242 of KaiA at steady state (Nishiwaki-Ohkawa et al., 2014), which suggests that the stability of the ADP-bound  
243 species is systematically underestimated by the model fit.

244 During the phosphorylation reaction, the amount of free KaiA is initially transiently depleted due to  
245 association with the ADP-bound U phosphoform (**Figure 2B**). Afterwards, KaiA primarily associates with  
246 the ATP-bound S and D phosphoforms as they appear, but does not bind to the T phosphoform strongly.  
247 Therefore, despite the lack of KaiB in the model, not all KaiA is free during the phosphorylation phase, and  
248 the amount of free KaiA depends on both the affinities of the nucleotide-bound states and the mixture of  
249 KaiC phosphorylation states (**Figure 1D**).



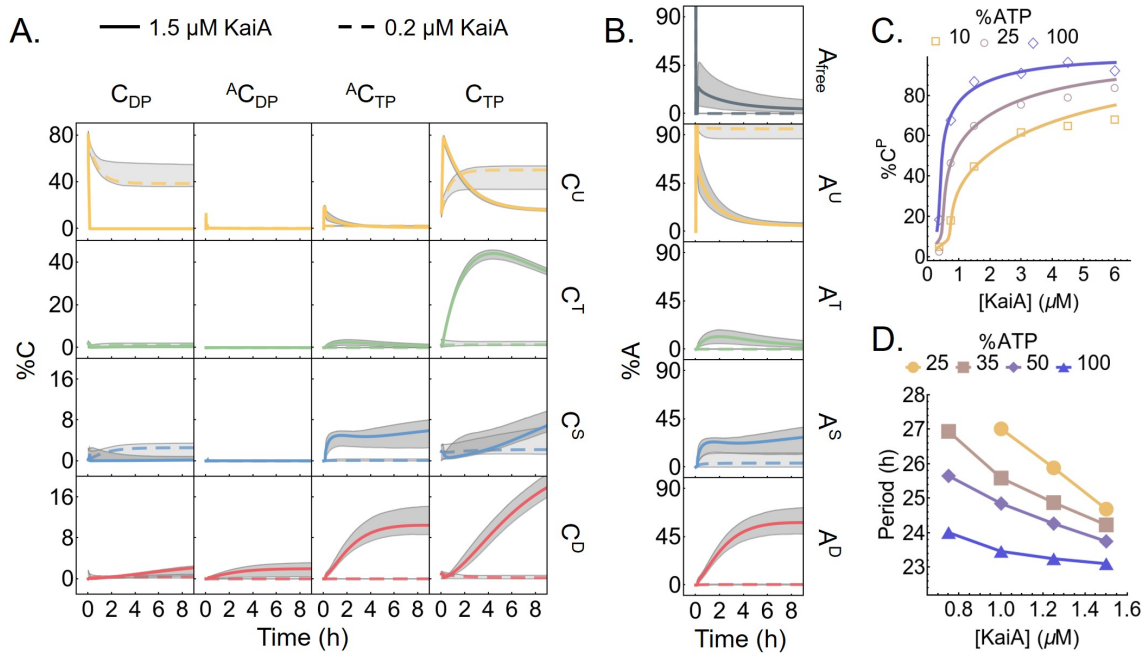

**Figure 2:** The model captures the kinetics of KaiC phosphorylation. A) The time evolution of all 16 KaiC species in a phosphorylation reaction with 100% ATP and either 1.5  $\mu\text{M}$  (solid curves) or 0.2  $\mu\text{M}$  (dashed curves) KaiA. The corresponding KaiA kinetics, broken down according to the phosphoform of the bound KaiC, is shown in B). The gray regions represent the 95% posterior interval. Refer to **Figure S1A** for the KaiC state nomenclature. C) KaiA concentration can tune the sensitivity of the KaiC phosphorylation level to %ATP. The points represent the measured total percentage phosphorylation levels at  $t = 12.25$  h (see **Figure 1B** for the full kinetics), and the curves represent the model prediction at the same time point. D) KaiA concentration can tune the sensitivity of the clock period to %ATP. The period of the full KaiABC oscillator is calculated from fluorescence polarization measurement (see **Figure S7A–C** for further analysis).

250 We were surprised to see that the model fit predicts that the KaiA binding affinity for the ATP-bound T  
 251 phosphoform is lower than those for the S and D phosphoforms. This is apparently in contradiction with  
 252 experimental results that show that S-phosphomimetic mutants reduce A-loop exposure and weaken KaiA  
 253 binding, while T-phosphomimetic mutants have opposite effects (Tseng et al., 2014; Chang et al., 2011).  
 254 However, there is some ambiguity in the experimental literature, with various results employing differ-  
 255 ent experimental methods and using proteins from different organisms, that has yet to be resolved. Our  
 256 model stresses the importance of the nucleotide-bound state, especially that of the U phosphoform. KaiC  
 257 nucleotide-bound state has generally not been measured in KaiA interaction studies and may be different  
 258 in phosphomimetic mutants (see also Kageyama et al., 2006; Qin et al., 2010a; Murakami et al., 2016).

259 The dephosphorylation pathway is simpler because KaiA is not involved. In the model, KaiC by itself  
 260 has no nucleotide exchange activity, and thus phosphorylated KaiC molecules in the absence of KaiA enter  
 261 a cycle of dephosphorylation by the transfer of phosphoryl groups from the phosphorylation sites back  
 262 to bound ADP molecules, followed by ATP hydrolysis and removal of inorganic phosphate, until the pro-  
 263 tein reaches the  $C_{DP}^U$  state (**Figure S4D**). The ADP-bound forms of the T, S, and D phosphoforms are only  
 264 transiently populated, suggesting that the dephosphorylation bottlenecks are the ATP hydrolysis reactions,  
 265 which make bound ADP available as a cofactor for dephosphorylation, rather than the phosphotransfer  
 266 reaction itself. The kinetic preference for the  $D \rightarrow S$  dephosphorylation pathway is the direct result of faster  
 267 dephosphorylation via the  $D \rightarrow S$  compared to the  $D \rightarrow T$  reaction (**Figure S1B**; compare the posterior distri-  
 268 bution of  $k_d^{DS}$  with that of  $k_d^{DT}$ ). During this process, KaiC can occasionally autophosphorylate, but it is driven  
 269 irreversibly towards the dephosphorylated state by ATP hydrolysis. We note here that the independence of  
 270 the dephosphorylation reaction from solution ADP (Rust et al., 2011) is a built-in feature of the model, since

271 solution %ATP only affects the nucleotide exchange rate, which is assumed in the model to be zero in the  
272 absence of KaiA.

### 273 **KaiA concentration tunes clock sensitivity to %ATP**

274 The model further allows us to summarize and interpret the effect of %ATP and KaiA on KaiC phosphoryla-  
275 tion observed in the training dataset (**Figure 2C**). Consistent with previous measurements (Rust et al., 2011;  
276 Phong et al., 2013), these results indicate that the near-steady-state ( $t = 12$  h) total phosphorylation level  
277 of KaiC ( $\%C^P = \%C^T + \%C^S + \%C^D$ ) is lower in the presence of ADP. Since we simultaneously vary %ATP and  
278 [KaiA], the data reveal that this inhibitory effect can be tuned by [KaiA]. In particular, the system is most  
279 insensitive to %ATP at either very low or very high [KaiA], while the %ATP sensitivity is the highest around  
280 [KaiA] = 0.75  $\mu$ M.

281 Interestingly, the %ATP sensitivity of the system cannot be fully abolished even at saturating KaiA con-  
282 centrations (**Figure 2C**). This effect can be interpreted qualitatively in terms of the structure of the model.  
283 When there is more KaiA in solution, more KaiC goes through intermediate states that are in complex with  
284 KaiA, by Le Châtelier's principle. This shifts a larger fraction of the KaiC population through states that allow  
285 for exchange of bound ADP for ATP, which promotes phosphorylation. On the other hand, as the %ATP  
286 decreases, the ATP to ADP exchange rate decreases according to (4). When nucleotide exchange becomes  
287 less efficient, more KaiC stays in ADP-bound states, which are prone to dephosphorylation. In summary,  
288 [KaiA] and %ATP both act on the phosphorylation kinetics via the nucleotide exchange step, where %ATP  
289 directly regulates the exchange rate constant and sets its upper bound, while [KaiA] controls the popula-  
290 tion of exchange-competent KaiC and thus the effective exchange rate. Therefore, the effects of KaiA and  
291 increasing solution %ATP are not equivalent; because the effective exchange rate cannot exceed the limit  
292 set by %ATP, even a saturating amount of KaiA cannot fully compensate for low %ATP.

293 Given that the metabolic sensitivity of the KaiA-KaiC subsystem can be tuned by KaiA concentration, we  
294 asked whether metabolic sensitivity of the full oscillator period may also be tuned by KaiA. To address this  
295 question, we characterized the dependence of the period of the in vitro KaiABC oscillator on [KaiA] and  
296 %ATP using an optical assay (Leypunskiy et al., 2017; Heisler et al., 2019) that allows automated, parallelized  
297 monitoring of the fluorescence polarization of labeled KaiB (**Figure 2D** and **Figure S7A–C**). Consistent with  
298 the hypothesis, we found that low KaiA concentration enhances the period sensitivity to %ATP compared to  
299 the standard condition (1.5  $\mu$ M KaiA). These results suggest that the KaiA activity, and how it is controlled,  
300 plays a critical role in determining the clock period stability.

### 301 **KaiC phosphorylation exhibits ultrasensitive dependence on KaiA levels**

302 In addition to inferring kinetics of states not easily accessible to experiments, the model allows us to inter-  
303 polate between the training data points and study the relation between KaiC phosphorylation, [KaiA], and  
304 %ATP at a much finer resolution. This analysis shows an ultrasensitive dependence of the steady-state  $\%C^P$   
305 on KaiA concentration (**Figure 3A** and D left). Specifically, we see a threshold-hyperbolic stimulus-response  
306 relation (Gomez-Uribe et al., 2007; Ferrell and Ha, 2014a), where KaiC phosphorylation is highly suppressed  
307 near the sub-micromolar [KaiA] regime, but then follows a right-shifted hyperbolic stimulus-response func-  
308 tion once [KaiA] exceeds a threshold. Importantly, the threshold depends on %ATP. The model makes similar  
309 predictions for the steady-state T, S, and D phosphoforms as well (**Figure S8A**). However, because of the  $T \rightarrow D$   
310 and  $S \rightarrow D$  phosphotransfer reactions, the stimulus-response relations of T and S are not monotonic func-  
311 tions of [KaiA] because high [KaiA] and high %ATP conditions stabilize the D phosphoform at the expense  
312 of the T and S phosphoforms.

313 Previous studies of KaiA-KaiC interactions examined the response of KaiC at relatively high KaiA con-  
314 centrations ( $\geq 1.2$   $\mu$ M), comparable to the total amount of KaiA used in an oscillating reaction. Ma and

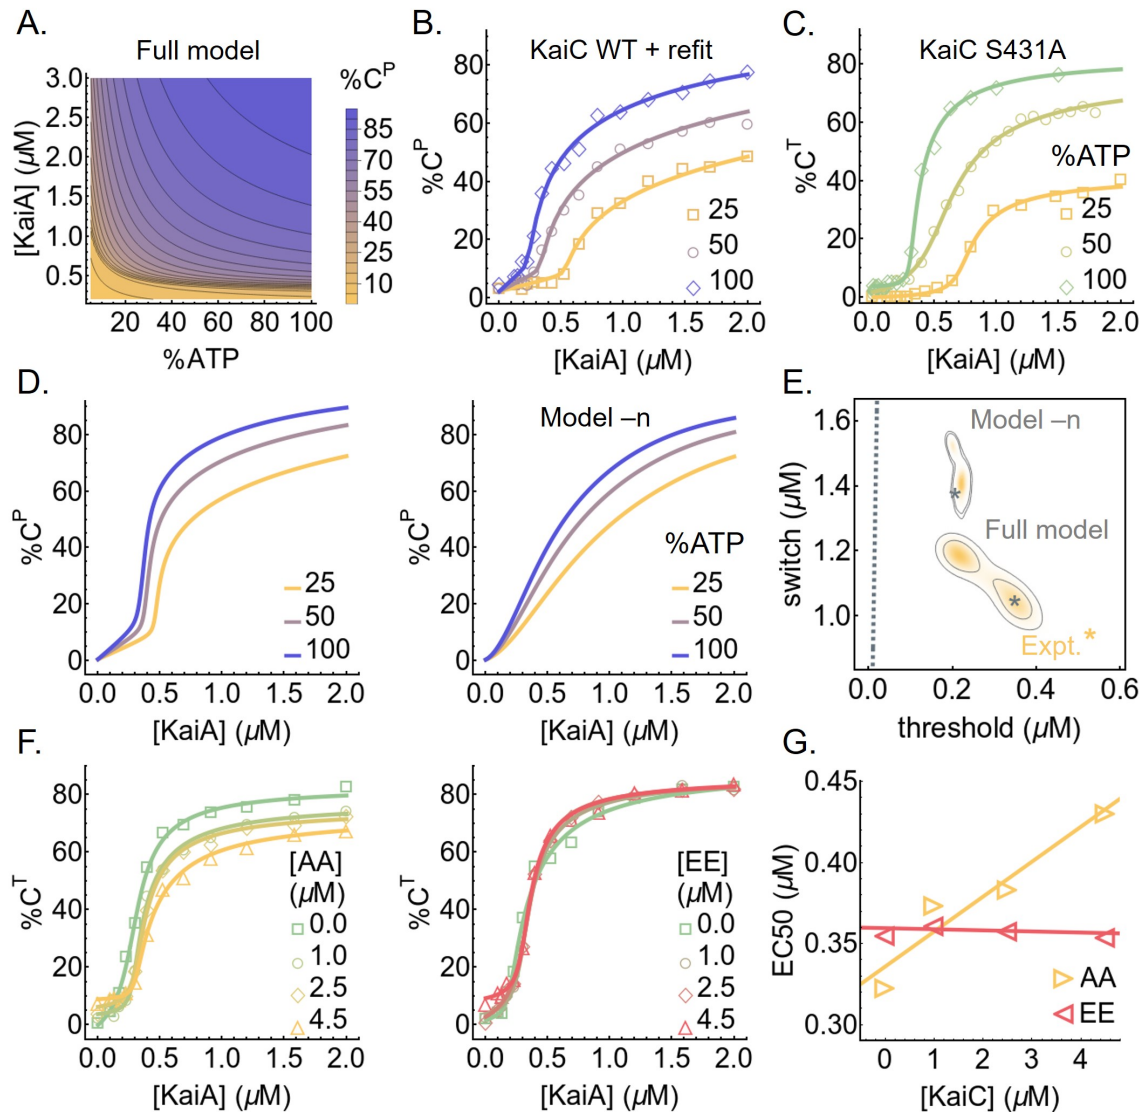

**Figure 3:** Substrate competition explains KaiC phosphorylation ultrasensitivity. A) The predicted stimulus-response relation of the total steady-state KaiC phosphorylation level as a function of %ATP and [KaiA]. B) Experimentally-determined stimulus-response function of KaiC at three %ATP conditions; the curves are based on refitting the best fit of the full model to the steady-state measurements. C) Similar to B) but for KaiC S431A, which has only one phosphorylation site; the curves are based on independent fits to a simple phenomenological substrate competition model. D) Cross sections of the stimulus-response relation at three %ATP, computed using the full model (left) and model -n (right). E) Posterior distributions for the shapes of the stimulus-response functions at 25% ATP predicted by the full model and model -n. The contours represent the 68% and 95% HDRs, and the gray stars represent the model best fits. The shape of the stimulus-response functions are quantified using two metrics: EC10, which quantifies threshold-like behavior, and EC90 - EC10, which quantifies switch-like behavior. The shape of the experimentally-determined stimulus-response function at 25% ATP is shown as the yellow star. The dashed line represents  $(EC10, EC90 - EC10) = (K/9, 80K/9)$ , which characterizes the shape of a hyperbolic stimulus-response function  $[A]/(K + [A])$  that has no switching or thresholding. F) The stimulus-response functions of KaiC S431A at 100% ATP in the presence of KaiC S431A/T432A (AA; left) and S431E/T432E (EE; right) phosphomimetic mutants to probe the effect of kinetic competition on KaiC phosphorylation. G) The relations between EC50 (the midpoint of a stimulus-response function) and KaiC AA/EE concentrations, quantified using the curves shown in F).

315 Ranganathan (2012) investigated the steady-state stimulus-response relation, but did not consider the ef-  
 316 fect of %ATP or fully characterize the low [KaiA] regime. Previous reports of initial phosphorylation rates

**Table 1:** Effects of differential KaiA (un)binding kinetics

| Model           | Log likelihood  |                   |            | Bayes factor* |
|-----------------|-----------------|-------------------|------------|---------------|
|                 | Phosphorylation | Dephosphorylation | Hydrolysis |               |
| Full model      | 422.9           | 346.8             | -0.8       | 1             |
| -n <sup>†</sup> | 249.2           | 275.4             | -0.3       | 10.4          |
| -p <sup>‡</sup> | 392.4           | 303.2             | -2.4       | 2.2           |
| -n,-p           | 204.4           | 266.4             | -2.6       | 19.7          |

\* We define the Bayes factor as the ratio of the marginal likelihood function of the full model over that of the simplified models. We adopt the convention that a Bayes factor larger than 3.2 is substantial evidence against the model (Vyshemirsky and Girolami, 2008).

<sup>†</sup> -n: on/off rates decoupled from nucleotide-bound state.

<sup>‡</sup> -p: on/off rates decoupled from phosphorylation state.

317 suggest that they exhibit a hyperbolic dependence on [KaiA] (Rust et al., 2007; Lin et al., 2014), similar to  
318 simple Michaelis-Menten enzyme-substrate systems. However, this does not imply that the steady-state  
319 stimulus-response relation is hyperbolic as well.

320 To assess the robustness of the model prediction across the ensemble, we use two metrics proposed  
321 by Gunawardena (2005) to quantify the shape of the predicted stimulus-response curves for %C<sup>P</sup> at any  
322 fixed %ATP: we use EC10 to measure the extent to which the curve acts as a threshold and EC90 - EC10  
323 to measure the extent to which the curve acts as a switch. Here, EC<sub>x</sub> is the KaiA concentration required to  
324 reach x% of the steady-state phosphorylation level at saturation. **Figure 3E** shows the distribution of these  
325 quantities in the ensemble at 25% ATP. Overall these statistics are tightly constrained by the training data  
326 set, and are clearly distinct from those from hyperbolic stimulus-response relations (**Figure 3E**, dashed gray  
327 line).

328 Given the robustness of the prediction, we sought to experimentally verify the shape of the stimulus-  
329 response function. We measured KaiC phosphorylation at  $t = 24$  h at various concentrations of [KaiA] at  
330 three %ATP conditions (**Figure 3B** and **Figure S8B**). Consistent with model prediction, the experimentally-  
331 derived stimulus-response relations are ultrasensitive with an %ATP-dependent phosphorylation threshold,  
332 and the stimulus-response relation of the S phosphoform at 100% ATP is non-monotonic. We then quan-  
333 tified the shape of the stimulus-response curve for %C<sup>P</sup> at 25% ATP using the same two metrics defined  
334 above (**Figure 3E**, yellow star). At 25% ATP, the shape of the experimentally-derived stimulus-response  
335 curve is close to that of the model prediction, but the model fit is systematically less threshold-like (i.e.,  
336 smaller EC10) and less switch-like (i.e., larger EC90 - EC10). This inconsistency is likely due to a combination  
337 of training data under-determining the shape of the curve at the sub-micromolar range (compare **Figure**  
338 **2C** with **Figure 3B**) and the fitting method under-estimating uncertainties (see **SI**).

339 Lastly, the saturation phosphorylation levels in the steady-state measurements appear systematically  
340 lower than those implied by the training data set (compare **Figure 3B** with D left). This may be a result  
341 of batch-to-batch variations in protein and nucleotide quantification. This difference can be corrected by  
342 refitting the full model to the steady-state measurement (**Figure 3B** and **Figure S8C**). The refit results sug-  
343 gest that errors in protein and nucleotide concentrations primarily affect the kinetic properties of the S  
344 phosphoform in the model (**Figure S8D**), but the refit does not change the qualitative conclusions.

## 345 **A substrate competition mechanism underlies ultrasensitivity in KaiC phosphoryla-** 346 **tion**

347 What is the mechanism of ultrasensitivity in KaiC phosphorylation? Given that each KaiC subunit has two  
348 phosphorylation sites, a plausible explanation is multisite phosphorylation, whereby the concentration of  
349 the maximally phosphorylated species exhibits an ultrasensitive dependence on the kinase concentration  
350 (Gunawardena, 2005) (or in this case, the nucleotide-exchange factor concentration), even if each consec-  
351 utive phosphorylation step follows mass action kinetics. To examine this possibility, we measured the  
352 stimulus-response relation of the KaiC S431A mutant, which has only one phosphorylation site, and the  
353 results show ultrasensitivity comparable to that of the WT protein (**Figure 3C**). Furthermore, because KaiC  
354 is its own phosphatase, it violates the assumption of distributivity (i.e., at most one modification takes place  
355 before the dissociation of the enzyme and substrate) (Gunawardena, 2005). Multisite phosphorylation thus  
356 cannot explain the observed ultrasensitivity.

357 In the ensemble of parameter sets, the KaiA dissociation constant of the ADP-bound (but not ATP-bound)  
358 U phosphoform ( $C_{DP}^U$ ) is in or below the nanomolar range, much smaller than that of any other species of  
359 KaiC (**Figure 1D**). This is consistent with recent single molecule observations suggesting that the unphos-  
360 phosphorylated form of KaiC can bind very tightly to KaiA (Mori et al., 2018) and native mass spectrometry  
361 measurements suggesting that KaiA binding to KaiC is enhanced by ATP hydrolysis, which would be needed  
362 to produce ADP-bound KaiC (Yunoki et al., 2019). Here, we argue that the key to understanding the origin of  
363 ultrasensitivity in the model lies in the differential binding affinity of KaiA to the ADP- and ATP-bound states  
364 of KaiC. We note here that since the model does not consider the hexameric structure of KaiC, we cannot  
365 rule out possible hexameric cooperative effects that may contribute to ultrasensitivity.

366 In the model, the differential KaiA binding affinity leads to the following dynamics: KaiA promotes phos-  
367 phorylation by catalyzing the exchange of the bound ADP for ATP, but this process is in a kinetic competition  
368 with ATP hydrolysis, which returns KaiC to the ADP-bound state. At the beginning of the phosphorylation  
369 reaction, almost all the KaiA is bound to  $C_{DP}^U$  (**Figure 2A** and **B**) due to its high abundance and high affinity  
370 for KaiA (**Figure 1D**). When [KaiA] is low, the competition between nucleotide exchange and hydrolysis in the  
371 U phosphoform reaches a steady-state where  $[C_{DP}^U]$  stays above [KaiA] (**Figure 2A**, dashed curves). There-  
372 fore, KaiA stays trapped by  $C_{DP}^U$  and the phosphorylation products (mostly T) cannot undergo nucleotide  
373 exchange. In the absence of KaiA, the autophosphatase activity of KaiC dominates, and the phosphoryla-  
374 tion products revert back to the U phosphoform.

375 When [KaiA] is high, however, the competition between nucleotide exchange and hydrolysis in the U  
376 phosphoform pushes  $C_{DP}^U$  below [KaiA] (**Figure 2A**, solid curves), which frees KaiA to catalyze the nucleotide  
377 exchange reactions of the phosphorylation products. Once the flux of phosphorylation, KaiA binding, and  
378 nucleotide exchange outweighs that of hydrolysis, dephosphorylation, and KaiA unbinding, the phosphy-  
379 lation products stay phosphorylated at steady state. Furthermore, the formation of phosphorylation prod-  
380 uct positively feeds back to deplete  $C_{DP}^U$ , further removing a KaiC state that traps KaiA and leading to rapid  
381 saturation of phosphorylation past the [KaiA] threshold. The [KaiA] threshold for phosphorylation depends  
382 on %ATP (**Figure 3A**), because when %ATP is low, more KaiA is needed to counteract the reduced ADP-to-ATP  
383 exchange rate.

384 This mechanism is a form of substrate competition (Ferrell and Ha, 2014b; Buchler and Louis, 2008),  
385 where the kinetic competition of multiple substrates for enzyme binding leads to ultrasensitivity. Here,  
386 KaiA acts as the enzyme, while the ADP-bound U phosphoform and the T (as well as S and D to a lesser  
387 extent due to phosphorylation ordering) phosphoform are the substrates that compete for KaiA binding.  
388 However, the fact that the phosphorylated and unphosphorylated forms of KaiC can interconvert through  
389 phosphotransfer reactions distinguishes the Kai system from a typical substrate competition scheme, where  
390 the substrates cannot interconvert.

391 The model suggests that the U phosphoform plays a special role in generating ultrasensitivity due to  
392 the significant difference in the affinity of KaiA for the ATP- vs. ADP-bound states of KaiC (**Figure 1D**). This

393 observation leads to two testable predictions. First, the amount of KaiA required to activate phosphoryla-  
394 tion should be higher when more U phosphoform is present. We tested this prediction experimentally by  
395 measuring the stimulus-response relation of KaiC S431A in the presence of KaiC S431A/T432A (AA), which  
396 mimics the U phosphoform, or KaiC S431E/T432E (EE), which mimics the D phosphoform. The KaiC AA and  
397 EE mutants act as competitors for the KaiA-KaiC interaction (**Figure 3F**). Consistent with the hypothesis, the  
398 EC50 (i.e., the midpoint of the ultrasensitive switch) is positively correlated with the concentration of KaiC  
399 AA, while varying KaiC EE has little effect (**Figure 3G**).

400 Second, the substrate competition mechanism suggests that the model should exhibit weaker nonlin-  
401 earity if KaiA has the same affinity to ATP- vs. ADP-bound states of a given KaiC phosphoform. To test  
402 this prediction, we constructed simplified models where KaiA on/off rates are set to be independent of the  
403 nucleotide-bound state (model -n) or phosphorylation state (model -p) and fit the new models to the ex-  
404 perimental data ab initio. Consistent with the prediction, decoupling KaiA on/off rates from the nucleotide-  
405 bound states results in a significant loss of ultrasensitivity (**Figure 3D** right and **Figure S9A**). Model -p by  
406 contrast behaves similarly to the full model (**Figure S9C**); consistent with the substrate competition mech-  
407 anism, the ADP-bound states of KaiC in model -p have higher affinity to KaiA than the ATP-bound states,  
408 regardless of the phosphorylation state (**Figure S9C**). We quantify the effects of such model reductions by  
409 computing the Bayes factor, which is a metric for systematic model comparison that favors goodness of  
410 fit but penalizes model complexity and parameter fine tuning (MacKay and Kay, 2003); it is similar to the  
411 Bayesian information criterion (Schwarz, 1978), but makes no asymptotic assumptions. The analysis shows  
412 that the loss of ultrasensitivity in model -n degrades the fit quality significantly, while model -p is only  
413 marginally worse than the full model (**Table 1**). Interestingly, a model where the KaiA on/off rates are com-  
414 pletely independent of the state of KaiC (model -n,-p; **Figure S9D** and **E**) is much worse than either model  
415 -n or model -p (**Table 1**). We conclude that the nucleotide-bound state of KaiC plays a key role in regulating  
416 its interaction with KaiA and thus in determining phosphorylation kinetics.

## 417 **Substrate competition underlies metabolic compensation**

418 Finally, we consider the implications of the ultrasensitivity for the full oscillator. For the sake of clarity, we  
419 make a distinction in this section among three subpopulations of KaiA: the sequestered KaiA, which refers  
420 to inactive KaiA in a KaiABC complex; the active KaiA, which refers to (free or bound) KaiA not sequestered  
421 by KaiB; and the free KaiA, which is not associated with either KaiB or KaiC.

422 We first consider the role ultrasensitivity plays in regulating KaiA activity. It is well-established that KaiB  
423 plays an essential role in regulating KaiA during nighttime. At dusk, the buildup of KaiC D and S phospho-  
424 forms triggers the binding of KaiB to CI (Rust et al., 2007; Chang et al., 2012; Mutoh et al., 2013; Phong et al.,  
425 2013; Lin et al., 2014; Tseng et al., 2017; Snijder et al., 2017; Mukaiyama et al., 2018) and subsequently the  
426 sequestration of KaiA by CI-bound KaiB (Kageyama et al., 2006; Qin et al., 2010a). In the absence of active  
427 KaiA, the CII domain autodephosphorylates, and the KaiABC ternary complex disassembles (Snijder et al.,  
428 2017) at dawn as KaiC reaches its dephosphorylated state (Tomita et al., 2005), freeing KaiA and readying  
429 the clock for the next cycle.

430 This understanding of the negative feedback loop implies that the sequestration of KaiA by KaiB is a  
431 source of nonlinearity in the system that is critical for generating oscillation. Indeed, in many models of  
432 the Kai oscillator, the complete sequestration of KaiA during dephosphorylation is either a built-in or re-  
433 quired feature for stable oscillation (e.g., Yoda et al., 2007; van Zon et al., 2007; Phong et al., 2013; Paj-  
434 mans et al., 2017b). Our observation that phosphorylation is suppressed nonlinearly at low [KaiA] suggests  
435 that complete sequestration of KaiA by KaiB is not necessary to prevent phosphorylation. Indeed, there  
436 is mounting evidence that KaiB sequestration by itself is insufficient to completely inactivate KaiA during  
437 dephosphorylation. Specifically, measurements using native mass spectrometry, co-immunoprecipitation  
438 (co-IP), and native PAGE suggest that there is a significant amount of KaiA<sub>2</sub>C<sub>6</sub> complex (Kageyama et al.,  
439 2006; Brettschneider et al., 2010) and free KaiA (Qin et al., 2010a) throughout the entire phosphorylation  
440 cycle.

441 To confirm that KaiA is not fully sequestered by KaiBC complexes, we used co-IP of FLAG-tagged KaiB to  
442 monitor the amount of uncomplexed KaiA in supernatant, which we interpret to be a measure of active KaiA  
443 concentration (**Figure 4A** and **Figure S7D**). The experiment shows that there is indeed a sizable amount of  
444 active KaiA in solution in the first half of the dephosphorylation stage, although the experiment does not  
445 allow us to assign absolute concentrations. Taken together, these results suggest that either the binding of  
446 KaiA to KaiBC is more labile or has lower affinity than previously assumed, or that the sequestration kinetics  
447 are slow compared to the length of the dephosphorylation stage. In either case, substantial amounts of  
448 KaiA appear to remain free of KaiABC complexes during oscillation.

449 The fact that the phosphorylation threshold scales with %ATP suggests that ultrasensitivity may also  
450 lead to insensitivity of the period of the Kai oscillator to %ATP (Phong et al., 2013), a phenomenon termed  
451 “metabolic compensation” (Johnson and Egly, 2014). We examine this issue using a simple model of the Kai  
452 oscillator proposed by Phong et al. (2013), which we hereafter refer to as the Phong model. The Phong  
453 model explicitly keeps track of the monomer phosphorylation cycle and uses KaiB binding to the S phos-  
454 phoform to generate negative feedback (**Figure 4B**). In the Phong model, the KaiA sequestration affinity is  
455 effectively infinite. In light of the co-IP experiment, we modify the model by assuming that the KaiA seques-  
456 tration reaction is in a quasi-equilibrium with a dissociation constant for KaiA binding to the KaiBC complex,  
457  $K_D$  (**Figure 4C**; see **SI** for mathematical details). When  $K_D$  is small (i.e.,  $< 10^{-3}$   $\mu\text{M}$ ), the modified model  
458 exhibits the same robust oscillations as the original model over a large range of %ATP, but the range of %ATP  
459 that allows for stable oscillation shrinks as  $K_D$  increases (**Figure 4E** top), and the model is unstable when  
460  $K_D$  is in the micromolar range regardless of %ATP.

461 In the original Phong model, the dependence of KaiC phosphorylation on KaiA is described by a Michaelis-  
462 Menten-like function with no ultrasensitivity. In this scenario, a small increase in active KaiA leads to a  
463 proportional increase in phosphorylation, making the dephosphorylation phase of the clock strongly de-  
464 pendent on the strength of KaiB-mediated KaiA sequestration. To test if ultrasensitivity can increase the  
465 robustness of oscillations in the model, we introduce a phenomenological patch to the model in the form of  
466 an ultrasensitive KaiA threshold to the phosphorylation rate function, which varies as a function of %ATP and  
467 U phosphoform concentration (**Figure 4D**; see **SI** for mathematical details). Given that the ultrasensitivity is  
468 a result of substrate competition, this modification effectively introduces an inhibitory interaction between  
469 the U phosphoform and KaiA (**Figure 4B**, dashed arrow). This modification amounts to the assumption  
470 that the EC50 measured at steady state (**Figure 3A**) in the absence of KaiB corresponds to the active KaiA  
471 concentration required to re-enter the phosphorylation phase at the trough of the circadian oscillation. Re-  
472 markably, the resulting model can generate stable oscillations over a larger range of both %ATP and  $K_D$   
473 conditions (**Figure 4E** bottom). This observation suggests that ultrasensitivity in KaiC phosphorylation plays  
474 a role in clock stability that complements the function of KaiB-dependent KaiA sequestration.

475 Why does ultrasensitivity in KaiC phosphorylation allow for metabolic compensation? The binding of  
476 KaiB to KaiC, and thus the sequestration and inactivation of KaiA, depends on S431 phosphorylation of  
477 KaiC (i.e., the S and D phosphoforms). At low %ATP, the maximal S and D concentrations,  $[C_{\text{max}}^{S+D}]$ , are lower  
478 (**Figure 4F**). Thus the maximal amount of KaiA sequestered by the KaiBC complex is smaller. This is prob-  
479 lematic for the stability of the clock at low %ATP, since the active KaiA can promote premature KaiC U $\rightarrow$ T  
480 phosphorylation of some molecules, which can lead to phase decoherence, manifest as decaying oscilla-  
481 tion (**Figure S7E**). The ultrasensitive stimulus-response that we report here implies that a finite amount of  
482 KaiA must be liberated from KaiB before there is a noticeable impact on KaiC phosphorylation. In other  
483 words, the inhibitory effect of ultrasensitivity is a synchronization mechanism. Importantly, the EC50 of the  
484 stimulus-response function scales with %ATP, such that the capacity of phosphorylation suppression by  $C^U$   
485 is enhanced at low %ATP, which compensates for weaker KaiA sequestration (**Figure 4F**). This relation likely  
486 also contributes to the scaling of the phosphorylation limit cycle size with %ATP (**Figure 4G**). At higher %ATP,  
487 the EC50 is smaller and thus more KaiA needs to be sequestered to trigger dephosphorylation, which im-  
488 plies that higher concentrations of the S and D phosphoforms need to accumulate to enable KaiB binding.  
489 Since KaiC phosphorylation is ordered, this means that the T phosphoform concentration scales with %ATP  
490 as well.

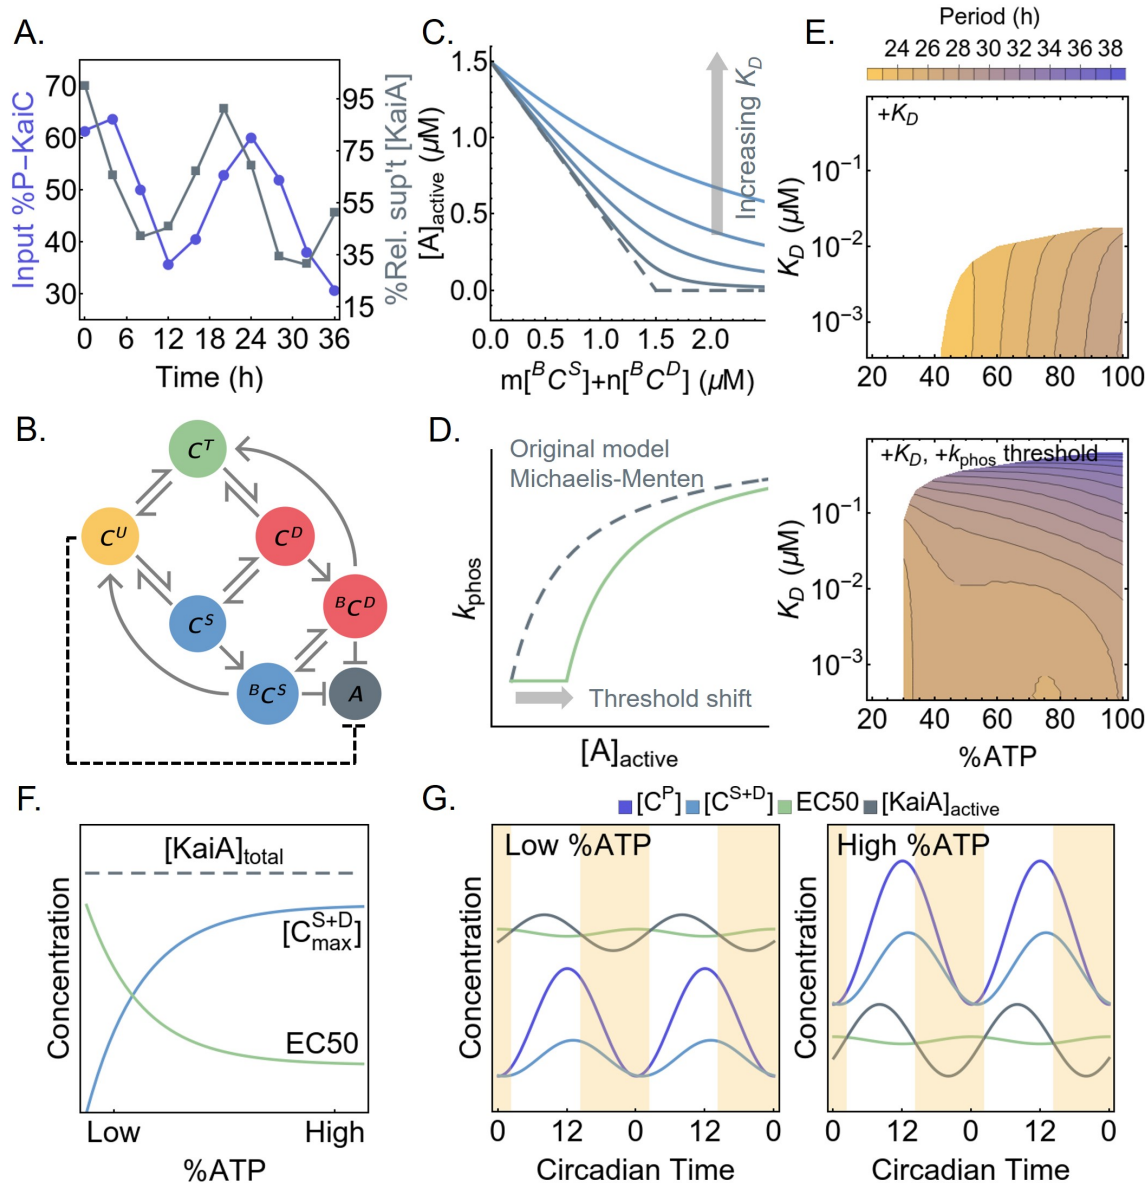

**Figure 4:** Ultrasensitivity enables metabolic compensation. A) The time series of the total input KaiC phosphorylation level (purple, left scale) and residual KaiA concentration not precipitated with KaiB-FLAG (gray, right scale). B) A schematic of the oscillator model by Phong et al. (2013). Here,  $B_{C^S}$  and  $B_{C^D}$  represent the KaiB-bound S and D phosphoforms, respectively, which can sequester KaiA. The dashed line represents the effect of introducing ultrasensitivity to the model. C) A cartoon representation of introducing a KaiA sequestration affinity,  $K_D$ , into the Phong model. The original model has an effectively infinite sequestration affinity (dashed curve). D) A cartoon representation of introducing a KaiA threshold to the Michaelis-Menten-type phosphorylation rate constant in the Phong model. E) The period of the oscillator model as a function of %ATP and  $K_D$ , a measure of KaiA sequestration affinity, without (top) or with (bottom) a phosphorylation threshold. All model simulations were done with 3.5  $\mu\text{M}$  of KaiC and 1.5  $\mu\text{M}$  of KaiA. White regions indicate unstable or no oscillation. F) The extent to which KaiA can be sequestered by KaiB depends on the maximal S and D phosphoform concentration,  $[C_{max}^{S+D}]$ , achieved over the phosphorylation cycle. The scaling of the EC50 of the phosphorylation stimulus-response function, which is a measure of the capacity of the U phosphoform to suppress KaiA activity, compensates for the scaling of  $[C_{max}^{S+D}]$  with %ATP. G) The scaling of EC50 and  $[C_{max}^{S+D}]$  contribute to the scaling of the phosphorylation cycle size with %ATP. As %ATP increases, EC50 decreases and thus higher concentrations of the S and D phosphoforms are required to sequester active KaiA and trigger dephosphorylation. These dynamics enable increased accumulation of the T phosphoform at higher %ATP.



## 491 Discussion

492 In this work we undertook a data-driven kinetic modeling approach to understand the metabolic sensi-  
493 tivity of the KaiA-KaiC subsystem, part of the *S. elongatus* circadian oscillator. We constructed a detailed  
494 yet mechanistically agnostic kinetic model, which was fit to extensive experimental measurements of KaiC  
495 phosphorylation kinetics within a Bayesian parameter estimation framework. Approaches that are similar  
496 in spirit have been pursued in eukaryotic systems (e.g., Forger and Peskin, 2003; Locke et al., 2005; Mirsky  
497 et al., 2009; Relógio et al., 2011; Kim and Forger, 2012). However, owing to the greater complexity of eu-  
498 karyotic clocks, these studies combined direct experimental measurements, cost function optimization, and  
499 hand tuning of selected parameters to account for unknown or unconstrained biochemical processes. Be-  
500 cause the Kai system can be studied as a well-defined mixture of purified components, the participating  
501 molecular species are known, and all the parameters in the model can be treated in a consistent manner to  
502 enable objective comparison of mechanisms underlying collective oscillations.

503 This data-driven approach is to be contrasted with the more common hypothesis-driven, forward mod-  
504 eling approach, whereby a model is built to examine how features of the oscillator arise from proposed  
505 mechanisms. This hypothesis-driven approach has been employed extensively in the study of the cyanobac-  
506 terial clock. These studies have revealed insights into specific aspects of the oscillator function, such as en-  
507 trainment (Brettschneider et al., 2010; Leypunskiy et al., 2017), synchronization (Yoda et al., 2007; van Zon  
508 et al., 2007; Sasai, 2019), irreversibility (Cao et al., 2015), and robustness against variations in temperature  
509 (Hatakeyama and Kaneko, 2012; François et al., 2012; Kidd et al., 2015; Murayama et al., 2017), ATP/ADP  
510 concentration (Phong et al., 2013; Paijmans et al., 2017a; del Junco and Vaikuntanathan, 2019), protein copy  
511 numbers (Brettschneider et al., 2010; Lin et al., 2014; Chew et al., 2018), and environmental noise in general  
512 (Pittayakanchit et al., 2018; Monti et al., 2018). This hypothesis-driven approach is pedagogically powerful  
513 but gives little indication of the range of the parameter space consistent with a proposed mechanism, which  
514 makes it difficult to quantify the uncertainties of model predictions and validate them experimentally.

515 Not all parameters in our model were fully constrained by the data, as expected given the complexity of  
516 the model (Gutenkunst et al., 2007). Nevertheless, the ensemble of parameter sets still led to consistent pre-  
517 dictions. In particular, the model revealed unexpected ultrasensitivity in KaiC phosphorylation as a function  
518 of KaiA, which we confirmed experimentally. The source of ultrasensitivity in the model is a substrate com-  
519 petition mechanism that arises from the differential affinity of ADP- and ATP-bound KaiC for KaiA. Previous  
520 studies have considered the importance of the differential affinity of KaiA for KaiC states but have focused  
521 on phosphorylation (Paijmans et al., 2017b; Mori et al., 2018). We note here that the ultrasensitivity in KaiC  
522 phosphorylation that we discovered acts to regulate KaiA activity at a different phase of the cycle than the  
523 ultrasensitivity in KaiB-dependent KaiA sequestration that arises from opposing S and T phosphorylations  
524 within hexamers (Lin et al., 2014). Presumably, the presence of nonlinearities and delayed feedback at mul-  
525 tiple steps in a molecular oscillator allows the system to achieve greater robustness (Kim and Forger, 2012;  
526 Jolley et al., 2012; Dovzhenok et al., 2015; Pett et al., 2016).

527 We hypothesized that ultrasensitivity in KaiC phosphorylation plays a role in stabilizing the oscillator at  
528 low %ATP conditions by suppressing premature phosphorylation during the dephosphorylation stage and  
529 thus promoting phase coherence. Currently, the Kai oscillator model most robust against yet tunable by  
530 metabolic conditions appears to be that of Paijmans et al. (2017a,b). In the Paijmans model, metabolic  
531 compensation is achieved both at the hexamer and ensemble level. At the hexamer level, the onset of de-  
532 phosphorylation is primarily controlled by the antagonistic effects of the T and S phosphoforms. Since fewer  
533 subunits in the T phosphoform accumulate at low %ATP, fewer subunits in the S phosphoform are needed  
534 to trigger dephosphorylation; therefore, the reduced amplitude of oscillation counteracts the slower phos-  
535 phorylation rate at low %ATP. At the ensemble level, low %ATP limits the fraction of hexamers that are able  
536 to trigger dephosphorylation before the onset of KaiB-mediated delayed inhibition; this makes the dephos-  
537 phorylation phase shorter, which compensates for the longer phosphorylation phase. It is worth noting  
538 that the Paijmans model is not oscillatory when %ATP reaches below 50% partly due to phase decoherence  
539 during dephosphorylation, an issue that can potentially be addressed with ultrasensitivity in KaiC phos-  
540 phorylation. In our model the coupling between KaiA binding affinity and KaiC nucleotide-bound states is

541 critical in generating ultrasensitivity, a feature that is missing in the Paijmans model. It remains an open  
542 question whether a hexameric model with no such coupling can nevertheless produce ultrasensitivity in  
543 KaiC phosphorylation (see **SI** for further comparison between this work and the Paijmans model).

544 In *S. elongatus*, the Kai oscillator is embedded in a transcription-translation feedback loop (Kitayama  
545 et al., 2008; Zwicker et al., 2010; Qin et al., 2010b). However, with the exception of peroxiredoxin oxida-  
546 tion cycles (O'Neill et al., 2011; Edgar et al., 2012), cell-autonomous circadian rhythms in eukaryotes are  
547 thought to be generated by interlocked transcription-translation feedback loops (Novák and Tyson, 2008);  
548 the cooperative autoregulation of transcription is a key source of nonlinearity and robustness in the circuit  
549 (e.g., Leloup et al., 1999; Gonze et al., 2002; Leloup and Goldbeter, 2003; Locke et al., 2005; Brown et al.,  
550 2012). Our results raise the possibility that post-translational protein modifications and protein-protein in-  
551 teractions may also contribute to robustness by introducing ultrasensitivity, even if these processes do not  
552 generate self-sustaining rhythms that can be decoupled from transcription. In general, it is clear that post-  
553 translational steps such as (de)phosphorylation (Gallego and Virshup, 2007; Reischl and Kramer, 2011; Zhou  
554 et al., 2015; Fustin et al., 2018), protein degradation (Gallego and Virshup, 2007; Reischl et al., 2007), and  
555 complex formation (Kim and Forger, 2012) play an important role in eukaryotic circadian oscillators, but  
556 to our knowledge there is currently no complete experimental characterization of the stimulus-response  
557 relations of these processes.

## 558 Materials and Methods

### 559 Computational methods

560 **Treatment of nucleotide exchange** Here we derive (4) in Results. The nucleotide exchange process is in  
 561 principle a two-step reaction that includes an *apo* intermediate state of KaiC, i.e.,

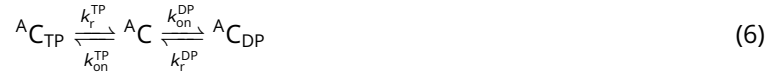

562 where we have omitted the free ATP and ADP from the chemical equation. Here,  $k_r^{TP}$  and  $k_r^{DP}$  are the  
 563 dissociation rate constants and  $k_{on}^{TP}$  and  $k_{on}^{DP}$  are the binding rate constants for ATP and ADP, respectively.  
 564 Since KaiC requires nucleotides for hexamerization (Hayashi et al., 2003, 2006; Mutoh et al., 2013), the *apo*  
 565 state of KaiC is presumably both thermodynamically and kinetically unstable in the presence of saturating  
 566 amount of nucleotide (5 mM in our experiments). Therefore, under the assumption that the KaiC *apo* state  
 567 is in a quasi-steady state throughout the reactions, we can eliminate the *apo* state and model nucleotide  
 568 exchange as a one-step reaction

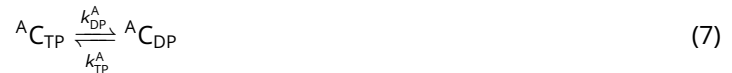

where

$$k_{TP}^A = k_r^{DP} \frac{[ATP]}{[ATP] + K_{on}[ADP]} \quad (8)$$

$$k_{DP}^A = k_r^{TP} \left( 1 - \frac{[ATP]}{[ATP] + K_{on}[ADP]} \right) \quad (9)$$

569 and  $K_{on} = k_{on}^{DP} / k_{on}^{TP}$  is a ratio of the two nucleotide binding rate constants.

570 We make two further simplifying assumptions. First, we assume the on rates are completely diffusion  
 571 controlled and are thus the same for ATP and ADP, which allows us to set  $K_{on} = 1$ . Second, based on  
 572 fit results (**Figure S4F**) showing that the posterior for  $k_r^{TP}$  has a long tail to negative infinity in log space,  
 573 we follow the approach proposed by Transtrum and Qiu (2014) and set  $k_r^{TP} = 0$ ; i.e., the dwell time of  
 574 ATP-bound states are sufficiently long such that a bound ATP cannot be released without first giving up its  
 575  $\gamma$ -phosphate group. This assumption implies that the only ways for KaiC to enter an ADP-bound state are  
 576 through hydrolysis and phosphorylation, and solution ADP has no effect on the system except to slow down  
 577 the ADP to ATP exchange process. With these two assumptions, we eliminate (9) and (8) reduces to (4).

578 **Model parameterization** In Results, we introduced a model parameterization scheme in which rate con-  
 579 stants for phosphotransfer, nucleotide exchange, KaiA (un)binding, and ATP hydrolysis reactions depend on  
 580 the participating molecular species. Although we use this independent-rate scheme to interpret the model,  
 581 including computing the sensitivity ODEs, during the fitting itself we represent species-dependent effects  
 582 by modifying each of the six basic rate constants ( $k_p$ ,  $k_d$ ,  $k_a$ ,  $k_b$ ,  $k_r^{DP}$ , and  $k_h$ ) by multiplicative  $\Delta k$  factors. For  
 583 example, the KaiA dissociation rate  $k_b^{T,TP} = k_b \Delta k_b^{T,TP}$  is represented by the product between a base rate  $k_b$   
 584 and a modifier  $\Delta k_b^{T,TP}$  (compare **Figure S1** and **Figure S10**). The multiplicative-factor scheme introduces 38  
 585  $\Delta k$  parameters. Because of the requirement for detailed balance (see below), only 34 of these parameters  
 586 are free; these free parameters are listed on **Table 2**. The advantage of the multiplicative parameterization  
 587 scheme is that it facilitates  $\ell^1$  regularization, discussed below.

588 **Detailed balance** All elementary reactions, except ATP hydrolysis and nucleotide exchange, are assumed  
 589 to occur in equilibrium, and thus the free energy change over each reversible cycle must be equal to zero.

**Table 2:** Full model parameters and their priors

| Category            | Species-dependent effect | Parameters                                                                                                                                                         | Prior                          | Unit            |
|---------------------|--------------------------|--------------------------------------------------------------------------------------------------------------------------------------------------------------------|--------------------------------|-----------------|
| Basic               | N/A                      | $k_h, k_p, k_d, k_a, k_b, k_r^{DP}$                                                                                                                                | $10^{\mathcal{N}(\mu,3)}$ †    | $s^{-1}$ §      |
| Nucleotide exchange | KaiA & phos.*            | $\Delta k_{TP}^{A,T}, \Delta k_{TP}^{A,S}, \Delta k_{TP}^{A,D}$                                                                                                    |                                |                 |
| Hydrolysis          | phos.                    | $\Delta k_h^T, \Delta k_h^S, \Delta k_h^D$                                                                                                                         |                                |                 |
|                     | KaiA & phos.             | $\Delta k_h^{A,U}, \Delta k_h^{A,T}, \Delta k_h^{A,S}, \Delta k_h^{A,D}$                                                                                           |                                |                 |
| KaiA on             | nuc.* & phos.            | $\Delta k_a^{U,DP}, \Delta k_a^{D,DP}, \Delta k_a^{D,TP}$                                                                                                          |                                |                 |
| KaiA off            | nuc. & phos.             | $\Delta k_b^{U,DP}, \Delta k_b^{T,DP}, \Delta k_b^{S,DP},$<br>$\Delta k_b^{D,DP}, \Delta k_b^{T,TP}, \Delta k_b^{S,TP},$<br>$\Delta k_b^{D,TP}$                    | $10^{\text{Laplace}(\mu,1)}$ † | N/A             |
| (De)phosphorylation | phos.                    | $\Delta k_p^{US}, \Delta k_d^{SU},$<br>$\Delta k_p^{TD}, \Delta k_d^{DT},$<br>$\Delta k_p^{SD}, \Delta k_d^{DS}$                                                   |                                |                 |
|                     | KaiA & phos.             | $\Delta k_p^{A,UT}, \Delta k_d^{A,TU}, \Delta k_p^{A,TD},$<br>$\Delta k_d^{A,DT}, \Delta k_p^{A,SD}, \Delta k_d^{A,DS},$<br>$\Delta k_p^{A,US}, \Delta k_d^{A,SU}$ |                                |                 |
| Global error        | N/A                      | $\sigma^2$                                                                                                                                                         | Inv-Gamma (1, 0.01)            | $\mu\text{M}^2$ |
| Initial conditions  | N/A                      | $[C_{TP}^U]_0, [C_{DP}^U]_0, [C_{TP}^T]_0, [C_{DP}^T]_0,$<br>$[C_{TP}^S]_0, [C_{DP}^S]_0, [C_{TP}^D]_0, [C_{DP}^D]_0$                                              | Dirichlet(a) ‡                 | $\mu\text{M}$   |

\* phos., phosphoform; nuc., nucleotide-bound state

† The mean of the priors,  $\mu$ , is zero unless specified by **Table 5**.

§ or  $s^{-1} \cdot \mu\text{M}^{-1}$  for the second-order rate constant  $k_a$ .

‡  $a = (20, 100, 1, 1, 1, 1, 1, 1)$ ; points drawn from the distribution are scaled by the total KaiC concentration. The support of the Dirichlet distribution implies that only seven of the eight initial conditions are free fitting parameters.

590 In practice, this means that the product of all rate constants in the forward direction of each cycle listed on  
 591 **Table 3** must be equal to that in the reverse direction (see also **Figure S10A**). This introduces an additional  
 592 algebraic constraint for each such cycle, which is used to eliminate one free  $\Delta k$  parameter. In total, one can  
 593 eliminate four such arbitrarily chosen parameters.

594 **Fitting data set** To constrain the model parameters, we collected experimental measurements that char-  
 595 acterized different aspects of the KaiA-KaiC subsystem, which are summarized in **Table 4**.

596 The dephosphorylation reaction taken from Rust et al. (2011) constrains the dephosphorylation rates  
 597 and the ATP hydrolysis rates of KaiC in the absence of KaiA, because the model structure dictates that

**Table 3:** Detailed balance conditions

| Cycle                                                  | Detailed balance condition                                                                                                      |
|--------------------------------------------------------|---------------------------------------------------------------------------------------------------------------------------------|
| $\{C_{TP}^S, C_{DP}^D, {}^A C_{DP}^D, {}^A C_{TP}^S\}$ | $\delta k_a^{S,TP} = \Delta k_b^{S,TP} \frac{\Delta k_d^{A,DS}}{\Delta k_p^{A,SD}} \frac{\Delta k_a^{D,DP}}{\Delta k_b^{D,DP}}$ |
| $\{C_{TP}^T, C_{DP}^D, {}^A C_{DP}^D, {}^A C_{TP}^T\}$ | $\delta k_a^{T,TP} = \Delta k_b^{T,TP} \frac{\Delta k_d^{A,DT}}{\Delta k_p^{A,TD}} \frac{\Delta k_a^{D,DP}}{\Delta k_b^{D,DP}}$ |
| $\{C_{TP}^U, C_{DP}^T, {}^A C_{DP}^T, {}^A C_{TP}^U\}$ | $\delta k_a^{T,DP} = \Delta k_b^{T,DP} \frac{\Delta k_p^{A,UT}}{\Delta k_d^{A,TU}}$                                             |
| $\{C_{TP}^U, C_{DP}^S, {}^A C_{DP}^S, {}^A C_{TP}^U\}$ | $\delta k_a^{S,DP} = \Delta k_b^{S,DP} \frac{\Delta k_p^{A,US}}{\Delta k_d^{A,SU}}$                                             |

dephosphorylation requires alternating phosphotransfer and hydrolysis reactions. There is currently no direct measurement of CII hydrolysis rate in the presence of KaiA. However, the maximum ADP production rate of KaiC in the presence of 1.2  $\mu\text{M}$  of KaiA was reported to be  $29.8 \pm 5.1 \text{ KaiC}^{-1} \cdot \text{day}^{-1}$  (Terauchi et al., 2007), which we take as an upper bound on the average CII hydrolysis rate in phosphorylation reactions for all  $[\text{KaiA}] = 0.375, 0.75, \text{ and } 1.50 \mu\text{M}$  conditions.

Because the phosphorylation reactions were measured in the presence of varying %ATP and higher [ADP] inhibits phosphorylation by slowing down nucleotide exchange (see equation 4), they provide indirect constraints on the nucleotide exchange rate. Similarly, because the reactions were measured in the presence of varying [KaiA] conditions, they provide direct constraint on the phosphorylation rates of KaiC with and without KaiA, as well as the KaiA binding affinity, i.e., the ratio of KaiA on/off rates. Although there are direct experimental measures of KaiA binding and dissociation (Kageyama et al., 2006; Mori et al., 2018), these results cannot be directly mapped onto model rate constants. This is primarily because the KaiC nucleotide-bound fractions are not reported in these experiments, or, in the case of phosphomimetic mutants, it is unclear if the mutations affect nucleotide binding affinities. As a consequence, the experimental constraints on KaiA on/off rates enter through the priors rather than the likelihood function, in contrast to the other data (see below).

**Initial conditions** For each phosphorylation reaction in **Table 4**, we solve the ODE model with the corresponding [KaiA] and %ATP condition. The predicted phosphoform composition, as well as the ATP hydrolysis rate when appropriate, is compared to the experimental measurements in the Bayesian parameter estimation formalism described below. However, since the experimental data do not resolve the initial conditions for all 16 KaiC species in the model, we have chosen to directly estimate the initial concentrations as free model parameters. We take  $t = 0$  to be the time point at which KaiA is mixed with KaiC, and thus all eight KaiA-bound KaiC states are assumed to have zero concentration at the onset of the experiment. Because total KaiC concentration is conserved, this introduces seven additional free parameters (see **Table 2**).

For the dephosphorylation reaction, we do not estimate the initial conditions. To mimic the way the experiment was done, the dephosphorylation reaction is simulated in two stages. In the first stage, we assume that 3.4  $\mu\text{M}$  of dephosphorylated KaiC is phosphorylated in the presence of 1.3  $\mu\text{M}$  KaiA and 100% ATP for 20 h. Since the protein is initially dephosphorylated, we assume that  $[C_{TP}^U]_0 = 3.4 \mu\text{M}$  while the concentrations of all other KaiC species are set to zero. In the second stage, we simulate the autodephosphorylation reaction after KaiA pull-down, which corresponds to eliminating all free KaiA as well as KaiA-bound KaiC species from the simulation. The amount of KaiC lost in the pull-down experiment was not reported in the original experiment (Rust et al., 2011). We therefore make the assumption that the amount of KaiC lost in the pull-down experiment in the simulation is exactly equal to that in the experiment for the purpose of

**Table 4:** Fitting data set

| Measurement (source)                      | Temperature (°C) | [KaiA]* (μM)                        | %ATP        | Time points | Phosphoform          |
|-------------------------------------------|------------------|-------------------------------------|-------------|-------------|----------------------|
| Phosphorylation (this work)               | 30               | 0.375, 0.75, 1.50, 3.00, 4.50, 6.00 | 10, 25, 100 | 8           | U, T, D <sup>†</sup> |
| Dephosphorylation (Rust et al., 2011)     | 30               | 1.4                                 | 100         | 21          |                      |
| ADP production (Terauchi et al., 2007)    | 30               | 1.2                                 | 100         | 1           | N/A                  |
| KaiA on/off rates (Kageyama et al., 2006) | 25               | Variable                            | 100         | N/A         | Likely U             |
| KaiA dwell time (Mori et al., 2018)       | 25–28            | 1.0                                 | N/A         | N/A         | T, S, D <sup>‡</sup> |

\* We report here on the KaiA monomer concentration. However, since KaiA functions as a dimer, all KaiA concentration is divided by two in the models.

<sup>†</sup> The conservation of mass constraint implies that one of the four phosphoforms is not a free state variable. We have chosen the S phosphoform to be the constrained state variable.

<sup>‡</sup> Phosphomimetic mutants

631 computing the likelihood function.

632 **Bayesian parameter estimation** We directly fit numerically integrated ODEs to experimental data in the  
 633 Bayesian parameter estimation framework (Wasserman, 2000). The best fit model parameters,  $\hat{\theta}$ , are ob-  
 634 tained from the maximum a posteriori estimator:

$$\hat{\theta} = \arg \max_{\theta} p(\theta|\mathcal{D}), \quad (10)$$

635 where  $p(\theta|\mathcal{D})$  is the posterior distribution of the parameters  $\theta$ , conditioned on the training data set  $\mathcal{D}$ . Using  
 636 Bayes' theorem, the posterior distribution can be written as

$$p(\theta|\mathcal{D}) = \frac{\mathcal{L}(\mathcal{D}|\theta)p(\theta)}{p(\mathcal{D})}. \quad (11)$$

637 Here,  $p(\theta)$  is the prior distribution, which represents subjective belief in the model parameters  $\theta$  prior to  
 638 experimental input;  $\mathcal{L}(\mathcal{D}|\theta)$  is the likelihood function, which represents a probabilistic model of the exper-  
 639 imental data set  $\mathcal{D}$  given a particular model  $\mathcal{M}$  (implicit in the formulas) that depends on the parameters  
 640  $\theta$ ;  $p(\mathcal{D})$  is the evidence, which is analogous to the partition function in statistical mechanics. Note that the  
 641 evidence  $p(\mathcal{D})$  does not depend on the parameter choice, and is thus an irrelevant constant for the purpose  
 642 of parameter estimation. The specific choices for the functional forms of the likelihood function and priors  
 643 are discussed further below.

644 **Model priors** The priors for all model parameters used in Bayesian parameter estimation are given in  
 645 **Table 2**. Here, the choice of the prior distributions is primarily motivated by the need for regularization  
 646 (see below). In addition, as discussed above, the experimental measurements on KaiA binding kinetics are

**Table 5:** Priors incorporating KaiA on/off constraints

| Parameter                                            | Prior mean ( $\mu$ )                                    | Experimental measurements                                         | Source                 |
|------------------------------------------------------|---------------------------------------------------------|-------------------------------------------------------------------|------------------------|
| $k_a$                                                | $\log k_{a,\text{exp}}$                                 | $k_{a,\text{exp}} = 0.0279 \text{ s}^{-1} \cdot \mu\text{M}^{-1}$ | Kageyama et al. (2006) |
| $k_b$                                                | $\log k_{b,\text{exp}}$                                 | $k_{b,\text{exp}} = 0.0663 \text{ s}^{-1}$                        |                        |
| $\Delta k_b^{\text{T,DP}}, \Delta k_b^{\text{T,TP}}$ | $-\log \tau_{b,\text{exp}}^{\text{T}} k_{b,\text{exp}}$ | $\tau_{b,\text{exp}}^{\text{T}} = 1.0 \text{ s}$                  | Mori et al. (2018)     |
| $\Delta k_b^{\text{S,DP}}, \Delta k_b^{\text{S,TP}}$ | $-\log \tau_{b,\text{exp}}^{\text{S}} k_{b,\text{exp}}$ | $\tau_{b,\text{exp}}^{\text{S}} = 0.43 \text{ s}$                 |                        |
| $\Delta k_b^{\text{D,DP}}, \Delta k_b^{\text{D,TP}}$ | $-\log \tau_{b,\text{exp}}^{\text{D}} k_{b,\text{exp}}$ | $\tau_{b,\text{exp}}^{\text{D}} = 0.26 \text{ s}$                 |                        |

647 incorporated into the priors rather than the likelihood function (**Table 5**). Note that all the rate constants  
 648 and their multiplicative factors are estimated in the log space (base 10). This ensures that all rate constants  
 649 are positive.

650  **$\ell^1$  regularization** As model complexity grows, the constraint of experimental data on the underlying  
 651 mechanism weakens. To address this problem, we impose sparsity on the species-dependent effects (i.e.,  
 652 the  $\Delta k$  factors) using  $\ell^1$  regularization (Tibshirani, 1996). This is accomplished in the Bayesian parameter  
 653 estimation framework by using a Laplace prior centered at zero in the log parameter space (or one in the  
 654 real space). Intuitively, the Laplace prior imposes sparsity by forcing the (marginalized) posterior distribu-  
 655 tion for each  $\log \Delta k$  to peak at zero unless there is experimental evidence in the fitting data set to suggest  
 656 otherwise. Since the  $\Delta k$ s are multiplicative factors modifying the six basic rate constants,  $\log \Delta k = 0$  im-  
 657 plies that the species-dependent rate is identical to that of the base rate. This method is directly analogous  
 658 to the use of the lasso estimator in the context of linear least squares models. To see this, consider the  
 659 Laplace distribution

$$p(\theta; b) = \frac{1}{2b} e^{-\|\theta\|_1/b} \quad (12)$$

660 where  $\|\theta\|_1$  is the  $\ell^1$ -norm of  $\theta$ . Then from (11) the negative log-posterior distribution becomes

$$-\ln p(\theta|\mathcal{D}) = -\ln \mathcal{L}(\mathcal{D}|\theta) + \lambda \|\theta\|_1 + \text{const.} \quad (13)$$

661 where  $\lambda = 1/b$ . In a linear model  $Y = X\beta + \epsilon$  where  $Y$  is the response vector,  $X$  is the design matrix,  $\beta$  is  
 662 the parameter vector, and  $\epsilon$  is the error vector, the negative log-likelihood function reduces to the sum of  
 663 squares  $\|Y - X\beta\|_2^2/N$ , where  $N$  is the number of dependent variables. Thus, maximizing the posterior is  
 664 equivalent to minimizing the sum of squares with an  $\ell^1$  penalty, which is the lasso estimator.

665 **Likelihood function** To determine the functional form of the likelihood function, consider a kinetic exper-  
 666 iment where measurements on some observables  $y$  are made at a set of time points  $\{t_i\}$  with uncertainties  
 667  $\{\sigma_i\}$ . If we assume that the experimental errors  $\sigma_i$  are independent and normally distributed, then the  
 668 likelihood function is given by

$$\mathcal{L}(\mathcal{D}|\theta) = \prod_i \frac{1}{\sqrt{2\pi}\sigma_i} e^{-[y_{\text{exp}}(t_i) - y_{\text{model}}(t_i; \theta)]^2 / 2\sigma_i^2} \quad (14)$$

669 In other words, the likelihood function gives the probability for observing a given data set provided that  
 670 the model prediction is true. In practice, all posterior evaluations are done in the log space (base  $e$ ) for  
 671 numerical stability. Thus, taken together, (11) can be rewritten as,

$$\ln p(\theta|\mathcal{D}) = -\sum_i \frac{[y_{\text{exp}}(t_i) - y_{\text{model}}(t_i; \theta)]^2}{2\sigma_i^2} + \ln p(\theta) + \text{const.} \quad (15)$$

672 For the sake of simplicity, we assume that there is a single global error,  $\sigma$ , for all (de)phosphorylation mea-  
673 surements, which is then estimated during fitting as a hyperparameter (see **Table 2**).

674 The choice of the Gaussian likelihood function applies to all (de)phosphorylation data sets, but not the  
675 hydrolysis constraint, which only provides an upper bound on the average hydrolysis rate per day (Terauchi  
676 et al., 2007). Therefore, for the hydrolysis data a “half harmonic” is used as the log-likelihood function:

$$\ln \mathcal{L}(\mathcal{D}|\theta) = \begin{cases} -\frac{([\text{ADP}]_{\text{model}}(\theta) - [\text{ADP}]_{\text{exp}})^2}{2\sigma_h^2}, & [\text{ADP}]_{\text{exp}} \leq [\text{ADP}]_{\text{model}} \\ 0, & 0 \leq [\text{ADP}]_{\text{model}} < [\text{ADP}]_{\text{exp}} \end{cases} \quad (16)$$

677 The total amount of ADP produced by the model during a phosphorylation reaction over 12 h,  $[\text{ADP}]_{\text{model}}$ , is  
678 given by the sum of all  $P_i$  production over time plus all ADP-bound KaiC species at  $t = 12$  h.

679 The log-likelihood values from the appropriate phosphorylation, dephosphorylation, and hydrolysis re-  
680 actions are added together to determine the log-likelihood of the data set for each given model parameter  
681 choice. Since the phosphorylation data set is much larger than the dephosphorylation data set, the fitting  
682 procedure tends to favor fitting the phosphorylation data set at the expense of fitting the dephosphoryla-  
683 tion data set. To overcome this problem, the log-likelihood function for the dephosphorylation reaction is  
684 multiplied by a factor of 4 to increase the weight of the dephosphorylation data points.

685 **Model fitting procedure** To determine the posterior mode and the uncertainties associated with the  
686 estimate, we employ a heuristic combination of ensemble MCMC sampling and numerical optimization  
687 methods (**Figure S3A**). This fitting procedure can be divided into four steps that are analogous to those in a  
688 genetic algorithm:

- 689 1. Initialization. An ensemble MCMC method evolves a set of random walkers (i.e., parameter sets) si-  
690 multaneously; we thus begin by drawing 224 walkers from the prior distribution  $p(\theta)$  and use these  
691 walkers for simulated annealing (Kirkpatrick et al., 1983; Kirkpatrick, 1984). In annealing, instead of  
692 sampling  $p(\theta|\mathcal{D}) \propto \mathcal{L}(\mathcal{D}|\theta)p(\theta)$  (in the log space), a flattened distribution  $\mathcal{L}(\mathcal{D}|\theta)^\beta p(\theta)$  is sampled with  
693 an annealing schedule of  $\beta = 0.3, 0.4, 0.5, 0.6, 0.7, 0.8, 0.9, 1.0$ . Note that instead of letting  $\beta \rightarrow \infty$ ,  
694 the simulation ends with the target distribution at  $\beta = 1.0$ . Each temperature is sampled over 20,000  
695 steps.
- 696 2. Selection. The fitnesses of the walkers are determined by their log-posterior values (equation 15). 10  
697 walkers from the best 300 parameter sets sampled in the previous step are chosen and subjected to  
698 numerical optimization to find the nearby local maximums, which are then used to seed a sampling  
699 run in the next step. In the spirit of elitist selection, the best walker is always included for the next  
700 generation.
- 701 3. Recombination and mutation. The initial walkers for the sampling run are generated by adding a  
702 Gaussian noise  $\mathcal{N}(0, 0.001)$  to the 10 optimized walkers, and the number of initial walkers centered  
703 around each optimized walker  $\theta_j$  is given by

$$224 \frac{p(\theta_j|\mathcal{D})^\beta}{\sum_k p(\theta_k|\mathcal{D})^\beta}. \quad (17)$$

704 That is, the proportion of the initial walkers generated from each optimized walker is weighted by its  
705 posterior value with a temperature factor of  $\beta = 0.6$ ; the temperature factor is chosen to allocate  
706 more walkers to optimized walkers with lower posterior values. The sampling run consists of 50,000  
707 steps. Note that the purpose of the Gaussian noise is to ensure that the proposal distribution is  
708 valid for any pair of walkers for the ensemble MCMC method (see below), rather than to control the  
709 mutation strength, as is done in evolution strategy (Beyer and Schwefel, 2002).



710 4. Termination. The best walkers from the sampling run are compared to the optimized walkers. If the  
711 best walkers do not escape to new local maximum(s) with higher posterior value(s), then the proce-  
712 dure is terminated after an additional 50,000 sampling steps. If, however, new local maximum(s) are  
713 discovered during sampling, the algorithm loops back to the selection step. This process is repeated  
714 until no better local maximum is discovered at the end of sampling. Unless otherwise specified, only  
715 the last 30,000 sampling steps (downsampled every 100 steps) are used for post-analysis.

716 In general, the number of walkers in ensemble MCMC needs to be larger than the number of free pa-  
717 rameters; here the number 224 is chosen to optimize parallel performance on a local computer cluster (8  
718 nodes  $\times$  28 CPU cores/node).

719 We found that this procedure outperformed either ensemble MCMC or numerical optimization by itself  
720 (compare **Figure S3A** and B). For the full model we ran this procedure three times to assess the reproducibil-  
721 ity of the fit (see **SI** for further discussion).

722 **Markov chain Monte Carlo** One major challenge in efficient MCMC sampling in systems biology is that  
723 the target distributions are often poorly scaled. In the context of ODE kinetic modeling, this means that  
724 different reaction rates and their associated uncertainties can be separated by several orders of magni-  
725 tude. This is almost certainly true for the KaiA-KaiC subsystem because, among other things, the experi-  
726 mentally measured rates of KaiA binding and dissociation are much faster than the ATP hydrolysis rate of  
727 KaiC. Without *a priori* knowledge of the natural time scales, conventional MCMC schemes are inefficient in  
728 such sampling problems, because only very small displacements are accepted at appreciable rates. In this  
729 work we employ an ensemble MCMC method developed by Goodman and Weare (2010). The advantage  
730 of the Goodman-Weare algorithm is that it is affine invariant, which means that it performs equally well  
731 for isotropic and poorly scaled measures, providing that the two can be related by a linear transformation  
732 of the coordinate system. This appears to be the case for the present problem since the Goodman-Weare  
733 algorithm vastly outperforms a standard Metropolis-Hastings scheme with a (preconditioned) Gaussian pro-  
734 posal distribution (**Figure S3B**).

735 In brief, the Goodman-Weare algorithm evolves an ensemble of walkers, rather than a single one. At  
736 each step, individual walker positions are updated sequentially. For a given walker  $\theta_k$  at step  $\tau$ , a walker  $\theta_j$   
737 is drawn randomly from the rest of the ensemble and a new position,  $\eta$ , on the line connecting  $\theta_k$  and  $\theta_j$  is  
738 proposed by a “stretch move”

$$\eta = \theta_j + z [\theta_k(\tau) - \theta_j] \quad (18)$$

739 where  $z$  is a random number drawn from the distribution

$$Z \sim g(z; \alpha) = \begin{cases} 1/\sqrt{z}, & z \in [1/\alpha, \alpha] \\ 0, & \text{otherwise} \end{cases} \quad (19)$$

740 The “stretch factor”  $\alpha$  is a tunable parameter that controls the step size. In an  $N$ -dimensional parameter  
741 space, the new walker  $\eta$  is accepted with the probability

$$q = \min \left( 1, z^{N-1} \frac{p(\eta|\mathcal{D})}{p(\theta_k(\tau)|\mathcal{D})} \right) \quad (20)$$

742 which guarantees that the scheme obeys detailed balance and thus converges to the target distribution  
743  $p(\theta|\mathcal{D})$  as  $\tau \rightarrow \infty$ . Note that no derivative of the posterior distribution is required to draw from the proposal  
744 distribution. In this work we use  $\alpha = 1.1$ , which gives an average acceptance rate of 47% in steps 3 and 4 of  
745 the fitting procedure.

746 **Numerical optimization** The numerical optimization method used in this work is a modified version of  
747 Powell’s method (Powell, 1964; Press et al., 2007). Briefly, given an initial guess and direction set, which

748 is usually the Cartesian coordinate set, Powell's method performs a line search to minimize the objective  
749 function, here  $-\ln p(\theta|\mathcal{D})$ , sequentially along each vector in the direction set. The direction set is then  
750 updated by replacing the direction of largest decrease in the objective function in the current iteration  
751 with the displacement vector from the estimated minimum at the beginning to that at the end of the line  
752 minimizations, provided that certain technical conditions are met to avoid the build-up of linear dependence  
753 in the direction set. This process is repeated until a convergence threshold is met. Note that unlike the  
754 original method, the modified Powell's method does not guarantee that the vectors in the direction set are  
755 mutually conjugate.

756 Similar to the Goodman-Weare algorithm, Powell's method is derivative-free. For the current system  
757 Powell's method converges faster than the Nelder-Mead method (Nelder and Mead, 1965), another com-  
758 monly used derivative-free method, although the Nelder-Mead method appears less prone to becoming  
759 trapped in local metastable states (**Figure S3C**).

760 **Software implementation** The fitting procedure is implemented in an in-house Python (Oliphant, 2015)  
761 script that interfaces with several existing Python modules: numerical integration of the model ODEs is  
762 done using the `odespy` package (Langtangen and Wang, 2015) with the BDF method; the Goodman-Weare  
763 algorithm is implemented in `emcee` (version 2.2.1) (Foreman-Mackey et al., 2013); Powell's method and  
764 the Nelder-Mead method are implemented in `scipy` (version 1.2.1) (Eric Jones et al., 2001). The derivative  
765 evaluation step in ODE integration is accelerated using `numba` (Lam et al., 2015), and the script is parallelized  
766 using `mpi4py` 2.0.0 (Dalcín et al., 2005, 2008; Dalcin et al., 2011).

767 The most computationally expensive step in the fitting procedure is the MCMC sampling, because each  
768 move requires multiple ODE evaluations to compute the posterior function. With 224 walkers and 8 nodes  
769 (each with 28 Intel E5-2680v4 2.4GHz cores), the speed of MCMC sampling is 46,000 steps/hour.

770 **Model comparison** In the preceding sections all definitions of probability distributions implicitly assume  
771 that there is a model  $\mathcal{M}$  with a well-defined functional form, whose parameters  $\theta$  need to be determined.  
772 For the sake of model comparison, we make this assumption explicit and rewrite (11) as

$$p(\theta|\mathcal{D}, \mathcal{M}) = \frac{\mathcal{L}(\mathcal{D}|\theta, \mathcal{M})p(\theta|\mathcal{M})}{p(\mathcal{D}|\mathcal{M})}. \quad (21)$$

773 To compare two models  $\mathcal{M}_i$  and  $\mathcal{M}_j$ , we need to compare the posterior probabilities for each model, usually  
774 in the form of their ratios

$$\frac{p(\mathcal{M}_i|\mathcal{D})}{p(\mathcal{M}_j|\mathcal{D})} = \frac{p(\mathcal{D}|\mathcal{M}_i) p(\mathcal{M}_i)}{p(\mathcal{D}|\mathcal{M}_j) p(\mathcal{M}_j)}. \quad (22)$$

775 Assuming that we have no prior preference for any model, the ratio becomes the Bayes factor

$$B_{ij} = \frac{p(\mathcal{D}|\mathcal{M}_i)}{p(\mathcal{D}|\mathcal{M}_j)}, \quad (23)$$

776 which we adopt as the metric for model comparison.

777 The primary difficulty in computing the Bayes factor is thus estimating the evidence, or the marginal  
778 likelihood function, for each  $\mathcal{M}_i$ . There are several methods for computing the evidence (Vyshemirsky and  
779 Girolami, 2008). Here we derive a formula compatible with the ensemble MCMC scheme that is directly  
780 analogous to free energy perturbation (Zwanzig, 1954). For the sake of simplicity, we drop the model index  
781  $i$  from this point on. First, note that for a given model  $\mathcal{M}$ ,

$$p(\mathcal{D}|\mathcal{M}) = \int \mathcal{L}(\mathcal{D}|\theta, \mathcal{M})p(\theta|\mathcal{M}) d\theta = \langle \mathcal{L}(\mathcal{D}|\theta, \mathcal{M}) \rangle_{p(\theta|\mathcal{M})} \quad (24)$$

782 where the first equality follows from the law of total probability and the second equality assumes that the  
783 prior  $p(\theta|\mathcal{M})$  is normalized (as a probability density function of  $\theta$ ). Equation (24) suggests that the marginal

784 likelihood function can be computed by estimating the average of the likelihood function  $\mathcal{L}(\mathcal{D}|\theta, \mathcal{M})$  against  
 785 the prior. Using MCMC to estimate this integral is inefficient since there is very little overlap between the  
 786 likelihood function and the prior for the models of interest. Instead, we define

$$q_\lambda(\theta) = \mathcal{L}(\mathcal{D}|\theta, \mathcal{M})^\lambda p(\theta|\mathcal{M}) \quad \text{and} \quad Z_\lambda = \int q_\lambda(\theta) d\theta$$

787 for  $0 \leq \lambda \leq 1$  and then note that (24) can be recast as

$$p(\mathcal{D}|\mathcal{M}) = \frac{Z_1}{Z_0} = \left( \frac{Z_{\lambda_0}}{Z_{\lambda_1}} \frac{Z_{\lambda_1}}{Z_{\lambda_2}} \dots \frac{Z_{\lambda_{N-1}}}{Z_{\lambda_N}} \right)^{-1} \quad (25)$$

788 for  $0 = \lambda_0 < \lambda_1 < \dots < \lambda_N = 1$ , and the  $\lambda$ s are chosen to allow for sufficient overlap between successive  
 789  $q_\lambda(\theta)$ s. Each fraction in (25) is given by

$$\frac{Z_{\lambda_{n-1}}}{Z_{\lambda_n}} = \frac{\int \mathcal{L}(\mathcal{D}|\theta, \mathcal{M})^{\lambda_{n-1}-\lambda_n} q_{\lambda_n}(\theta) d\theta}{\int q_{\lambda_n}(\theta) d\theta} = \langle \mathcal{L}(\mathcal{D}|\theta, \mathcal{M})^{\lambda_{n-1}-\lambda_n} \rangle_{q_{\lambda_n}} \quad (26)$$

790 Therefore,

$$p(\mathcal{D}|\mathcal{M}) = \prod_{n=1}^N \langle \mathcal{L}(\mathcal{D}|\theta, \mathcal{M})^{\lambda_{n-1}-\lambda_n} \rangle_{q_{\lambda_n}}^{-1} = \prod_{n=1}^N \left\langle e^{\ln q_{\lambda_{n-1}}(\theta) - \ln q_{\lambda_n}(\theta)} \right\rangle_{q_{\lambda_n}}^{-1} \quad (27)$$

791 where the averages  $\langle \cdot \rangle_{q_{\lambda_n}}$  can be approximated with MCMC. Equation (27) is a version of the free energy  
 792 perturbation formula. Note that (27) requires that the likelihood function  $\mathcal{L}(\mathcal{D}|\theta, \mathcal{M})$  be properly normalized  
 793 (as a probability density function of  $\mathcal{D}$ ), but does not require the prior  $p(\theta|\mathcal{M})$  to be normalized, as any  
 794 missing normalization constant cancels out in each term of the product.

795 For each simplified model in **Table 1** and **Table S1**, the ensemble of walkers from the last time step of  
 796 the model fitting procedure is used to initialize an MCMC sampling run with  $\lambda = 1.00$ . The lambda value is  
 797 reduced by 0.01 at each subsequent stage until  $\lambda$  reaches 0.01. Each stage is sampled for 2,000 time steps  
 798 using the Goodman-Weare ensemble sampler Goodman and Weare (2010). Only the last 1,000 time steps  
 799 from each stage is used to compute the ensemble average in (27). The Bayes factors are then computed as  
 800 the ratios of the evidence for the full model to each simplified model.

801 **Refitting** The steady-state KaiC phosphorylation measurements (**Figure 3B** and **Figure S8B**) are fit to the  
 802 full model using Powell's method, starting from the best fit based on the training data set. The priors on the  
 803 kinetic parameters (**Table 2**) are centered on the best fit values, so that the refit model can be interpreted  
 804 as the "minimal" perturbation to the best fit that enables agreement with the steady-state measurement.

805 **Curve fitting** The experimentally determined stimulus-response relations for KaiC S431A (**Figure 3C** and  
 806 F) are fit to the simple inhibitor ultrasensitivity scheme described in Box 5 of Ferrell and Ha (2014b). Using  
 807 their notation, the amount of phosphorylated protein substrate (%XP) as a function of kinase concentration  
 808 ( $[K]$ ) is given by

$$\%XP([K]) = P_{\max} \frac{K_1[I] + K_1K_2 - K_1[K] + 2K_2[K] - K_1\sqrt{[I]^2 + 2(K_2 - [K])[I] + (K_2 + [K])^2}}{2K_1[I] - 2(K_1 - K_2)(K_1 + [K])} + b \quad (28)$$

809 Here,  $P_{\max}$ ,  $[I]$ ,  $K_1$ ,  $K_2$ , and  $b$  are free model parameters. Unlike the Hill function, EC50 is not an explicit  
 810 parameter of (28) and thus needs to be determined numerically. Note that (28) can be reduced to a right-  
 811 shifted hyperbolic function as  $K_2 \rightarrow 0$ :

$$\%XP([K]) = P_{\max} \frac{[I] - [K] - |[I] - [K]|}{2[I] - 2(K_1 + [K])} + b, \quad (29)$$

812 which is equivalent to a threshold-hyperbolic stimulus-response function,

$$\%XP([K]) = \frac{P_{\max}([K] - [I])}{K_1 + ([K] - [I])} H([K] - [I]) + b, \quad (30)$$

813 where  $H$  is the unit step function.

814 Stimulus-response relations are fit using the NonlinearModelFit function in Mathematica 12.0. We stress  
815 here that the curve fits are purely phenomenological and are thus not intended to be interpreted in terms  
816 of the biochemical assumptions underlying the model.

## 817 Experimental methods

818 **Protein expression and purification** KaiA, KaiB, KaiB-FLAG, and KaiC were expressed and purified as  
819 previously described (Phong et al., 2013) with two modifications to the protocol: anion exchange chro-  
820 matography was performed using HiTrap Q columns (GE Healthcare), and KaiC was purified using Ni-NTA  
821 affinity chromatography followed by size-exclusion chromatography, omitting the anion exchange step. The  
822 expression, purification, and 6-iodoacetofluorescein (6-IAF) labeling of KaiB K25C mutant as a fluorescence  
823 reporter in the plate reader assay is described in Leypunskiy et al. (2017). All mutants of KaiC were con-  
824 structured using QuikChange II XL Site-Directed Mutagenesis Kit (Aligent). For the KaiC AA and EE mutants,  
825 the His-tags were not cleaved during purification; this ensures that these mutant proteins have shifted  
826 mobility in SDS-PAGE, allowing their bands to separate from those of KaiC S431A.

827 The U-[<sup>15</sup>N] labeled N-terminal (residues 1–135) and C-terminal (residues 181–284) domains of KaiA  
828 were expressed were expressed in BL21(DE3) *E. coli* (Novagen) in minimal (M9) media supplemented with  
829 <sup>15</sup>N-enriched NH<sub>4</sub>Cl. For expression of C-terminal domain, M9 media enriched with <sup>15</sup>N-NH<sub>4</sub>Cl was prepared  
830 using 98% deuterated water (D<sub>2</sub>O). The proteins were purified by Ni-NTA affinity chromatography followed  
831 by size-exclusion chromatography using Superdex 75 1660 prep grade column, as described previously  
832 (Chang et al., 2011, 2012; Tseng et al., 2014). N-terminal KaiA eluted as ~15 kDa monomer (Vakonakis et al.,  
833 2001), while C-terminal KaiA eluted as ~23 kDa homodimer (Vakonakis and LiWang, 2004).

834 GFP was expressed as N-terminal 6xHis-tag fusion from the pET28a plasmid in the BL21 (DE3) strain of  
835 *E. coli*. Harvested cells were sonicated for lysis and clarified lysate was loaded onto a HisTrap FF column  
836 (GE Healthcare). The His tag was cleaved by overnight incubation at 4 °C with SUMO protease (Invitrogen),  
837 after which the sample was loaded again onto a HisTrap FF column to recover the cleaved products. The  
838 cleaved proteins were further purified on a 5 mL HiTrap Q HP column (GE Healthcare) and then a Superdex  
839 200 10/300 GL size-exclusion column. The eluted fractions were concentrated in a sample buffer (20 mM  
840 HEPES [pH 7.4], 150 mM KCl, 2.5 mM MgCl<sub>2</sub>, 2 mM DTT), aliquoted, and snap frozen in liquid nitrogen for  
841 storage in -80 dC.

842 **In vitro clock reactions** All in vitro clock reactions were done in the standard reaction buffer (20 mM  
843 Tris-HCl [pH 8], 150 mM NaCl, 5 mM MgCl<sub>2</sub>, 0.5 mM EDTA, 10% glycerol, 50 µg/mL Kanamycin). KaiC con-  
844 centration was 3.5 µM in all experiments unless otherwise specified; KaiB concentration was 3.5 µM for all  
845 oscillatory reactions, and 6-IAF-labeled KaiB K25C concentration was 0.2 µM for plate reader assays. KaiA  
846 concentration and %ATP were determined by each individual experiment, while the total nucleotide concen-  
847 tration (i.e., [ATP] + [ADP]) was held constant at 5 µM. Phosphorylation kinetics was resolved using SDS-PAGE  
848 on 10% acrylamide gels (37.5:1 acrylamide:bis-acrylamide) run for 4.5 h at 30 mA constant current at 12 °C;  
849 the gels were stained in SimplyBlue SafeStain (Invitrogen) and then imaged using Bio-Rad ChemiDoc Im-  
850 ager. The oscillatory reactions (**Figure 2D**) were also monitored using the plate reader assay described in  
851 Leypunskiy et al. (2017).

852 **NMR spectroscopy** A Bruker 600 MHz AVANCE III spectrometer equipped with a TCI cryoprobe was used  
853 for all of the NMR experiments of the N- and C-terminal domains of KaiA (**Figure S2**). Chemical shifts were  
854 referenced to internal 2,2-dimethyl-2-silapentane-5-sulfonate (10  $\mu$ M). Data were processed using NMRPipe  
855 and visualized using NMRDraw (Delaglio et al., 1995). NMR samples were prepared with 100  $\mu$ M monomer  
856 concentration of protein in 20 mM Tris-HCl [pH 8], 150 mM NaCl, 5 mM MgCl<sub>2</sub>, and 5% D<sub>2</sub>O buffer. All  
857 experiments were performed at 30 °C. Samples were incubated with 1mM ATP or ADP, when needed, for 30  
858 minutes before spectral measurement.

859 **Immunoprecipitation** Immunoprecipitation of KaiB-FLAG and associated protein complexes in a clock  
860 reaction (**Figure 4A**) was done as previously described (Phong et al., 2013). The supernatant was analyzed by  
861 SDS-PAGE on 4–20% Criterion TGX Stain-Free Precast Gels (BioRad) and stained with SYPRO Ruby (BioRad).  
862 1.5  $\mu$ M GFP was added to the reaction mixture at the beginning of the time course and serve as an internal  
863 standard to correct for changes in protein concentration due to handling. The relative supernatant KaiA  
864 concentration was determined as a ratio of KaiA band intensity in each lane to the GFP band intensity and  
865 is normalized as percentage of the largest ratio in the time course (**Figure S7D**).

## 866 **Acknowledgments**

867 We thank Connie Phong and Haneul Yoo for their protein samples, and Jonathan Weare for helpful discus-  
868 sions. This work was supported by National Institutes of Health awards GM109455, GM107369, GM107521,  
869 and EY025957, Department of Energy Office of Advanced Scientific Computing Research contract DE-AC02-  
870 06CH11347 and award DE-SC0014205, and a Howard Hughes Medical Institute Faculty Scholarship (to MJR).  
871 AL was also supported by the Center for Cellular and Biomolecular Machines at University of California,  
872 Merced (NSF Grant HRD-1547848). Computations were performed on resources provided by the Univer-  
873 sity of Chicago Research Computing Center, and the Extreme Science and Engineering Discovery Environ-  
874 ment (Towns et al., 2014) (NSF Grant ACI-1548562) Bridges (PSC) computing nodes through allocation TG-  
875 MCB180007.

## 876 **Supplementary Information**

### 877 **Additional biochemistry of the KaiC (de)phosphorylation reactions**

878 In this work we construct a general model of the KaiA-KaiC subsystem based on a set of assumptions of  
879 basic clock biochemistry; that is, KaiC is an ATPase and a reversible phosphotransferase with two phospho-  
880 rylation sites at S431 and T432, while KaiA is a nucleotide-exchange factor that promotes the exchange of  
881 bound ADP for ATP in CII nucleotide-binding pockets. Through model fitting, we demonstrate that this set  
882 of assumptions is sufficient to explain the (de)phosphorylation kinetics of KaiC and its dependence on %ATP  
883 and [KaiA]. Our results, however, do not imply that the model is biochemically exhaustive; in this section  
884 and the next we briefly discuss aspects of KaiC enzymology that we do not consider in the model.

885 First, the current model does not account for the CI domain. The CI domain of KaiC is required for  
886 the hexamerization of *S. elongatus* KaiC (Hayashi et al., 2004b, 2006) and its ATPase activity is necessary  
887 for the allosteric transition into the dephosphorylation phase of the circadian cycle (Phong et al., 2013;  
888 Tseng et al., 2017). However, the hydrolysis state of the CI domain has no significant effect on the CII  
889 (de)phosphorylation reactions (Phong et al., 2013), and in the current study we are not concerned with  
890 KaiB-dependent processes. Therefore the current model does not keep track of the CI hydrolysis state or  
891 the allosteric coupling between the CI and CII domains.

892 Second, the model does not explicitly consider the function of  $Mg^{2+}$ . The presence of  $Mg^{2+}$  is required  
893 for the assembly of the KaiC hexamer (Hayashi et al., 2006; Mutoh et al., 2013), and computational analyses  
894 indicate that release of  $Mg^{2+}$  independent of the bound nucleotide is highly energetically unfavorable (Hong  
895 et al., 2018). Given these results, we assume that  $Mg^{2+}$  and nucleotide cannot act independently of each  
896 other, and the model implicitly assumes that each bound nucleotide is always in complex with a  $Mg^{2+}$  ion.  
897 A recent study, however, shows that the absence of  $Mg^{2+}$ , especially in buffers with no EDTA, promotes KaiC  
898 autophosphorylation (Jeong et al., 2019). Moreover, some structures of KaiC have modeled two  $Mg^{2+}$  ions  
899 in the nucleotide-binding pocket, which has been interpreted to mean that KaiC kinase activity relies on a  
900 two-metal-ion phosphotransfer mechanism (Pattanayek et al., 2009). Currently, the functions of  $Mg^{2+}$  have  
901 not been characterized kinetically or mechanistically at a level necessary to constrain a molecularly detailed  
902 model such as ours.

### 903 **The hexameric structure of KaiC**

904 The current model does not consider any hexameric effect. There is evidence to suggest that intersubunit  
905 interaction regulates KaiC autokinase activity (Kitayama et al., 2013) as well as the ultrasensitive dependence  
906 of KaiBC complex formation on the KaiC hexamer phosphoform composition (Lin et al., 2014). However,  
907 explicitly accounting for the hexameric nature of KaiC, as in Li et al. (2009) or Lin et al. (2014), would lead to  
908 a significant increase in the number of model parameters, which likely cannot be constrained by available  
909 data and makes interpretation of the model difficult. Therefore, we only keep track of monomeric KaiC  
910 species, and the rate constants should be considered averages over hexameric background configurations,  
911 weighted by their nonequilibrium state populations.

912 This leads to two simplifications concerning the KaiA-KaiC interactions. The first issue relates to the  
913 stoichiometry of KaiAC complexes. During phosphorylation, KaiA dimers bind to KaiC hexamers with either  
914 a 1:1 or 2:1 stoichiometry (Hayashi et al., 2004a; Yunoki et al., 2019). Because the model does not consider  
915 the hexameric structure of KaiC explicitly, this stoichiometry is not enforced, and each KaiC monomer can  
916 bind independently to KaiA.

917 The second issue relates to the effect of the hexameric phosphorylation state on KaiA (un)binding kinet-  
918 ics. KaiA and KaiB compete with each other for KaiC binding (Lin et al., 2014), even though their binding

919 sites are on opposing sides of KaiC. This has been interpreted as a result of cooperative allosteric transition  
920 between a kinase mode of KaiC, stabilized by KaiA binding and the T phosphoform, and a phosphatase  
921 mode of KaiC, stabilized by KaiB binding and the S phosphoform (Lin et al., 2014). An implication of this  
922 proposed mechanism is that KaiC hexamers in the phosphatase mode have uniformly diminished affinity  
923 for KaiA at the CII interface, regardless of the phosphorylation state of the subunits. Given that the cur-  
924 rent model is trained using primarily the phosphorylation data set, the predicted KaiA dwell time (**Figure**  
925 **S4B**) and dissociation constant (**Figure 1D**) likely reflect the property of KaiC subunits in the kinase mode,  
926 whereas experiments with phosphomimetic mutants mimicking the S and D phosphorylation states pre-  
927 sumably probe the system kinetics in the phosphatase mode. Indeed, in the KaiC EE titration experiment  
928 (**Figure 3F** right), the presence of KaiC EE has virtually no effect on the KaiC S431A stimulus-response curve,  
929 which may be partly due to the fact that the KaiC EE hexamers are in the phosphatase mode, a condition  
930 not considered in our model.

### 931 **Correlation structure in the posterior distribution**

932 As discussed in the literature Gutenkunst et al. (2007), often ratios of parameters are better constrained  
933 than the parameters themselves. The parameter pairs that have a correlation coefficient larger than 0.9 in  
934 log space are shown in **Figure S5A–C**. Such correlations typically reflect that thermodynamic, rather than ki-  
935 netic, properties of the system are constrained. These include the free energy of phosphotransfer between  
936 the S and D phosphoforms (**Figure S5A**) and the free energy for KaiA binding to the ATP-bound states of  
937 KaiC (**Figure S5B**; compare with **Figure 1D**). Interestingly, there is a linear relation among  $k_{TP}^{A,T}$ ,  $k_d^{A,TU}$ , and  
938  $k_b^{T,DP}$  (**Figure S5C**); this implies that the data constrain the flux out of the  $^A C_{DP}^T$  state, but the exact pathway  
939 is underdetermined.

940 More generally, we characterize the extent to which the model parameters, or linear combinations  
941 thereof, are constrained by the data using the principal components of the posterior distribution; that is, the  
942 eigenvectors of the covariance matrix from MCMC sampling. The eigenvalues of the covariance matrix span  
943 multiple orders of magnitude with no obvious gap (**Figure S5D** left), except for the stiffest direction (**Figure**  
944 **S5G**), which is almost entirely aligned with  $\sigma^2$ , the global error hyperparameter. In addition, the directions  
945 of the principal components are in general not aligned with the directions of the bare coordinates (**Figure**  
946 **S5D** right), and there is no obvious interpretation for the directions of most of the principal components  
947 (**Figure S5G**). These features of the ensemble indicate that the model is “sloppy” (Gutenkunst et al., 2007),  
948 and many model parameters are poorly constrained by the data. Nevertheless, as we demonstrate in Re-  
949 sults, the model can still be used to make consistent predictions because the variabilities in the ensemble  
950 of parameter sets obtained from MCMC sampling align with the softest degrees of freedom of the posterior  
951 distribution.

### 952 **Convergence of the model fit**

953 We assessed the quality of the fit in three ways. First, we repeated the full procedure three times to assess  
954 reproducibility of the fitting procedure (**Figure S1B**). The three independent runs yielded marginalized pos-  
955 terior distributions that are remarkably consistent and tightly constrained for some parameters but diverge  
956 over several orders of magnitude for others. The best fits from the three runs have log posterior values of  
957 720, 714, and 705, respectively. Unless otherwise specified, in this work we base our analyses on the run  
958 that produced the best fit with the highest posterior value. The ruggedness of the posterior distribution  
959 demonstrates that given the model and training data set, the parameter estimation problem is far from the  
960 asymptotic (i.e., large sample) regime. Moreover, in our fitting procedure the vast majority of the walkers  
961 from the annealing step is discarded for the sake of improving the MCMC sampling efficiency (the accep-  
962 tance rate is  $\leq 7\%$  without pruning). Given the presence of multiple local maxima, this choice likely resulted  
963 in an underestimation of the uncertainties in parameter values.



**Table S1:** Effects of KaiA on KaiC function

| Model*          | Log likelihood  |                   |            | Bayes factor |
|-----------------|-----------------|-------------------|------------|--------------|
|                 | Phosphorylation | Dephosphorylation | Hydrolysis |              |
| Full model      | 422.9           | 346.8             | -0.8       | 1            |
| -P <sup>†</sup> | 390.0           | 338.6             | -0.8       | 1.4          |
| -H <sup>‡</sup> | 355.5           | 308.8             | -0.9       | 2.5          |
| -P,-H           | 278.2           | 283.6             | -0.2       | 7.7          |

\* We do not consider a model where KaiA binding does not promote nucleotide exchange, because such models are incapable of autophosphorylation by construction.

<sup>†</sup> -P: KaiA binding decoupled from (de)phosphorylation rates.

<sup>‡</sup> -H: KaiA binding decoupled from KaiC hydrolysis rates.

964 Second, we compared the model predictions with a test data set that probed the phosphorylation reac-  
965 tion at two non-standard KaiC concentrations (**Figure S4E**). The fit quality on the test data set is somewhat  
966 worse compared to the training set (compare with **Figure 1B**). In particular, the model overestimates the  
967 D phosphoform concentration at 1.75  $\mu$ M KaiC and underestimates the T and D phosphoform concentra-  
968 tions at 7  $\mu$ M KaiC. This result suggests some degree of overfitting. This, however, is not a significant issue  
969 because we base our conclusions on the ensemble of walkers rather than the behavior of the best fit.

970 Lastly, we assessed the convergence of the MCMC simulations using the integrated autocorrelation  
971 times for the 48 principal components of the posterior distribution (**Figure S5E**). The autocorrelation times  
972 for the largest and smallest principal components are 8,500 and 3,300 steps, respectively, which gives rough  
973 estimates of the times between independent samples for the slowest and fastest degrees of freedom. These  
974 estimates are far shorter than the length of the final MCMC runs in the fitting procedure (100,000 steps). We  
975 also checked the autocorrelation time for the KaiA binding affinities (**Figure S5F**), which is within the bound  
976 given by the principal components.

## 977 **KaiA function cannot be solely explained in terms of nucleotide exchange**

978 Because of the generality of the model, the function of KaiA is not restricted to that of a nucleotide-exchange  
979 factor. In particular, the phosphotransfer and ATP hydrolysis rates are allowed to depend on KaiA binding.  
980 There is some experimental evidence to support such effects—KaiA binding inhibits dephosphorylation (Xu  
981 et al., 2003) and the addition of KaiA increases the ATPase activity of KaiC (Terauchi et al., 2007; Murakami  
982 et al., 2008). However, the biochemical mechanisms underlying these effects are not clear from the exper-  
983 iments; for example, does KaiA increase KaiC ATPase activity by reconfiguring the KaiC active site, or does  
984 KaiA binding indirectly promote ATP hydrolysis by shifting the KaiC population towards phosphoforms that  
985 have high ATPase activity?

986 To test whether KaiA binding has a direct effect on KaiC catalytic activities, we construct simplified mod-  
987 els where hydrolysis and/or phosphotransfer is independent of KaiA binding and compare the resulting  
988 models to the full model using the Bayes factor (**Table S1**). We find that decoupling either phosphotransfer  
989 (model -P) or hydrolysis (model -H) from KaiA binding decreases the evidence for the simplified models, but  
990 the effects are weak, especially in comparison to a model where both classes of reactions are decoupled  
991 from KaiA binding (model -P,-H). These results indicate that the function of KaiA cannot be solely explained  
992 by nucleotide exchange, but we cannot conclusively distinguish between models -P and -H.

## 993 The experimental data admit two S phosphorylation pathways

994 We analyzed a random selection of 500 walkers to understand the implications of their variations for the  
995 mechanisms of ordered phosphorylation. To simplify the analysis, we converted each walker to two single-  
996 site models in which either T431 or S432 was available for phosphorylation but not both. We asked how  
997 important each reaction rate constant is to the overall T and S phosphoform concentrations in the single-site  
998 models using the relative first-order sensitivities computed at the standard reaction condition (i.e., 100%  
999 ATP with 1.5  $\mu\text{M}$  KaiA). We focus on the initial phosphorylation rates because the steady-state rates are  
1000 determined by balances of many contributing processes, making them harder to interpret. The parameter  
1001 sensitivities at  $t = 1$  h are used as proxies for the sensitivities of the initial phosphorylation rates.

1002 Because each single-site model has 18 parameters, there are 36 sensitivities for the two phosphoforms.  
1003 To characterize this high-dimensional space, we used spectral clustering (**Figure S6A**). Overall, the param-  
1004 eter sensitivities are much more constrained by the data for the T phosphoform than the S phosphoform,  
1005 which is unsurprising given the relatively low concentrations of the S phosphoform under all experimen-  
1006 tal conditions in the training dataset. The clustering furthermore indicates that there are two plausible  
1007 kinetic ordering mechanisms, which differ primarily in terms of the phosphorylation pathways taken by the  
1008 S phosphoform (**Figure S6A** and B). In both clusters, the  $U \rightarrow T$  transition is most sensitive to  $k_p^{UT}$  (i.e., the  
1009 phosphorylation rate in the absence of KaiA).

1010 In the first cluster (319 parameter sets), the  $U \rightarrow S$  transition is most sensitive to  $k_p^{A,US}$  in the presence of  
1011 KaiA. This is primarily because  $k_p^{US}$  is very small in this cluster relative to  $k_p^{A,US}$  (**Figure S6C**); however, since,  
1012 in this cluster, the  $U \rightarrow S$  transition is dominated by the KaiA-bound states, the S phosphoform has negative  
1013 sensitivity to the KaiA dissociation rate constant  $k_b^{U,TP}$ . This suggests that in the first cluster, KaiA (un)binding  
1014 to the U phosphoform is important in determining the initial phosphorylation rate of S. The best fit belongs  
1015 to this first cluster.

1016 The phosphorylation pathway suggested by the second cluster (181 parameter sets) is more complex. In  
1017 this cluster, the  $U \rightarrow S$  transition is mostly independent of KaiA, similar to the  $U \rightarrow T$  reaction. However, the S  
1018 phosphoform is limited by the dephosphorylation reaction  $k_d^{SU}$ , which is much faster than the corresponding  
1019 phosphorylation rate (**Figure S6C**). In addition, the S phosphoform is sensitive to the rate constant for KaiA  
1020 binding,  $k_a^{S,DP}$ , which is important for facilitating nucleotide exchange for the ADP-bound S phosphoform,  
1021 but tends to be slower in the second cluster (**Figure S6C**). Therefore, faster dephosphorylation and slower  
1022 KaiA binding is important for determining the initial S phosphorylation rate in the second cluster.

1023 A comparison of **Figure S6C** with **Figure S1B** (blue distributions) shows that the two clusters correspond  
1024 to the bimodal posterior distributions for the rate constants  $k_p^{US}$ ,  $k_p^{A,US}$ ,  $k_d^{SU}$ , and  $k_a^{S,DP}$ . The two clusters,  
1025 however, do not cleanly separate along the two modes of  $k_a^{S,TP}$  and  $k_b^{S,TP}$ ; the kinetic significance of this  
1026 bimodal distribution is unclear.

1027 As discussed above, the posterior distribution is fairly rugged and thus the fitting procedure is not fully  
1028 reproducible over independent runs. As a result, there are likely multiple potential kinetic ordering mecha-  
1029 nisms that remain unexplored through this analysis. Regardless, the analysis suggests that kinetic ordering  
1030 is likely a result of an interplay between (de)phosphorylation and KaiA (un)binding kinetics, rather than  
1031 purely the product of equilibrium free energies of phosphotransfer.

## 1032 Comparison to the Paijmans model

1033 Among all the computational work on the Kai oscillator, the model most similar to the current work in  
1034 terms of the treatment of the KaiA-KaiC subsystem is that by Paijmans et al. (2017b), although the latter is  
1035 a full oscillator model including KaiB, the CI domain, and the allosteric transition between the active (i.e.,  
1036 phopshorylation phase) and inactive (dephosphorylation phase) KaiC conformations. The Paijmans model

1037 and the full model in this work are both molecularly detailed, and describe how phosphotransfer, ATP  
 1038 hydrolysis, KaiA (un)binding, and nucleotide exchange reactions control the phosphoform and nucleotide-  
 1039 bound states of KaiC. However, there are some significant differences between these two models, which we  
 1040 examine below.

1041 The Paijmans model is more general than this work in two ways. First, the Paijmans model explicitly  
 1042 considers the hexameric nature of KaiC. There is no intersubunit coordination of phosphotransfer in the  
 1043 Paijmans model, but it explicitly considers the binding of one KaiA dimer to a KaiC hexamer, which is as-  
 1044 sumed to uniformly accelerate nucleotide exchange in all six subunits. In this work, however, we do not  
 1045 consider the hexameric states of KaiC, and each KaiC monomer is allowed to bind to a KaiA dimer indepen-  
 1046 dently. In this way the affinities and kinetics of KaiA binding in this work may not be directly comparable  
 1047 to those in the Paijmans model. Second, the Paijmans model allows for the exchange of bound ATP for  
 1048 ADP, such that KaiA accelerates the exchange rates of both ATP and ADP while leaving the binding affinity  
 1049 unchanged. In our model, however, we assume that there is no exchange of bound ATP for ADP, effectively  
 1050 assuming that the affinity of ATP is infinite (i.e.,  $K_{ATP/ADP}^{CII} = 0$  in the Paijmans model terminology). The treat-  
 1051 ment of nucleotide exchange in both models are otherwise similar, in that both assume that the ATP/ADP  
 1052 on rates are identical, that the apo state is in a quasi-steady state, and that there is no KaiA-independent  
 1053 nucleotide exchange.

1054 The current work goes beyond the Paijmans model in the following ways. First, we determine the rate  
 1055 constants under the framework of Bayesian parameter estimation, which enables more rigorous uncer-  
 1056 tainty quantification, while the parameters in the Paijmans model were hand-tuned to reproduce selected  
 1057 experimental observations. Second, for simplicity the Paijmans model does not consider any possible cou-  
 1058 pling between ATP hydrolysis and KaiC phosphorylation states, between nucleotide exchange and KaiC  
 1059 phosphorylation states, between ATP hydrolysis and KaiA binding, or between KaiC nucleotide-bound states  
 1060 and KaiA binding. Although many of the species-dependent effects are not fully constrained by data in this  
 1061 work, as we describe in Results, the ultrasensitivity in KaiC phosphorylation depends critically on the cou-  
 1062 pling between KaiC nucleotide-bound states and KaiA binding. It is an open question whether a model that  
 1063 lacks such effects but explicitly accounts for the hexameric nature of KaiC can generate ultrasensitivity.

The difference in the treatment of KaiA binding affinity implies that some detailed balance conditions are incompatible between the two models. In the Paijmans model, the binding affinity of KaiA to KaiC hexamers during the phosphorylation phase depends on the phosphoform composition of the subunits, and each subunit  $i$  in the phosphoform  $X_i$  other than U contributes an additive factor of  $\delta g_{bind}^{CII-KaiA}(X_i)$  to the changes in KaiA binding free energy,  $\Delta G_{bind}^{CII-KaiA}$ . Due to detailed balance, the fact that KaiA binds to different KaiC phosphoforms with differential affinities implies that KaiA binding changes the free energy of phosphotransfer [see eq. 8 in Paijmans et al. (2017b)]. This condition is also present in our model, but is complicated by the nucleotide-bound states of KaiC. Using the multiplicative-factor parametrization scheme (see Materials and Methods), the detailed balance conditions in this work can be related to those in the Paijmans model by

$$\delta g_{bind}^{CII-KaiA}(T) - \delta g_{bind}^{CII-KaiA}(U) = -kT \ln \frac{\Delta k_b^{T,DP}}{\delta k_a^{T,DP}} \quad (31)$$

$$\delta g_{bind}^{CII-KaiA}(S) - \delta g_{bind}^{CII-KaiA}(U) = -kT \ln \frac{\Delta k_b^{S,DP}}{\delta k_a^{S,DP}} \quad (32)$$

$$\delta g_{bind}^{CII-KaiA}(D) - \delta g_{bind}^{CII-KaiA}(T) = -kT \ln \frac{\Delta k_b^{D,DP}}{\Delta k_a^{D,DP}} \frac{\delta k_a^{T,TP}}{\Delta k_b^{T,TP}} \quad (33)$$

$$\delta g_{bind}^{CII-KaiA}(D) - \delta g_{bind}^{CII-KaiA}(S) = -kT \ln \frac{\Delta k_b^{D,DP}}{\Delta k_a^{D,DP}} \frac{\delta k_a^{S,TP}}{\Delta k_b^{S,TP}} \quad (34)$$

1064 In general, this set of equations are inconsistent. That is, one cannot express the  $\delta g_{bind}^{CII-KaiA}(X)$ s in the Pai-  
 1065 jmans model in terms of the  $\Delta k$ s in our model. The only condition under which these equations can be

1066 made consistent is when

$$\frac{\Delta k_b^{T,DP}}{\delta k_a^{T,DP}} = \frac{\Delta k_b^{T,TP}}{\delta k_a^{T,TP}} \quad \text{and} \quad \frac{\Delta k_b^{S,DP}}{\delta k_a^{S,DP}} = \frac{\Delta k_b^{S,TP}}{\delta k_a^{S,TP}}$$

1067 that is, when the nucleotide-bound states have no effect on KaiA binding affinities to the T and S phospho-  
1068 forms.

## 1069 Phenomenological modifications to the Phong model

1070 In the model by Phong et al. (2013), KaiA sequestration is determined by the equation

$$[A]_{\text{active}} = \max(0, [A]_{\text{total}} - m[\text{B}^{\text{C}^{\text{S}}}] - n[\text{B}^{\text{C}^{\text{D}}}] ). \quad (35)$$

1071 Here,  $[A]_{\text{total}}$  is the total KaiA concentration;  $[\text{B}^{\text{C}^{\text{S}}}]$  and  $[\text{B}^{\text{C}^{\text{D}}}]$  are the concentrations of the S and D phospho-  
1072 forms in complex with KaiB, respectively;  $m$  and  $n$  are model parameters describing the binding stoichiome-  
1073 tries between KaiA and the KaiBC complex. In this way, the KaiA binding affinity to the inhibitory complex  
1074 is effectively infinite, with no KaiA dissociation until  $[\text{B}^{\text{C}^{\text{S}}}]$  and  $[\text{B}^{\text{C}^{\text{D}}}]$  drop below a threshold. To make the  
1075 representation of KaiA sequestration more realistic, we introduce a KaiA dissociation constant  $K_D$  (**Figure**  
1076 **4C**). Assuming that the KaiA sequestration reaction is in a quasi-equilibrium, we replace (35) with

$$[A]_{\text{active}} = \frac{1}{2} \left( [A]_{\text{total}} - SD - K_D + \sqrt{4[A]_{\text{total}}K_D + ([A]_{\text{total}} - SD - K_D)^2} \right) \quad (36)$$

1077 where we have defined  $SD = m[\text{B}^{\text{C}^{\text{S}}}] + n[\text{B}^{\text{C}^{\text{D}}}]$ .

1078 To introduce ultrasensitivity to the Phong model, we first note that the four phosphorylation rate con-  
1079 stants for the  $U \rightarrow T$ ,  $U \rightarrow S$ ,  $T \rightarrow D$ , and  $S \rightarrow D$  transitions are given by Michaelis-Menten kinetics with ADP serv-  
1080 ing as a competitive inhibitor,

$$k_{\text{phos}} = \frac{k_{\text{phos}}^A [A]_{\text{active}}}{K_{1/2} + [A]_{\text{active}}} \frac{1}{1 + K_I [\text{ADP}]/[\text{ATP}]} \quad (37)$$

1081 where  $k_{\text{phos}}^A$  varies with the specific phosphorylation reaction. To introduce ultrasensitivity, we add a thresh-  
1082 old term  $T$  (**Figure 4D**),

$$k_{\text{phos}} = \frac{k_{\text{phos}}^A ([A]_{\text{active}} - T)}{K_{1/2} + ([A]_{\text{active}} - T)} \frac{1}{1 + K_I [\text{ADP}]/[\text{ATP}]} H([A]_{\text{active}} - T) \quad (38)$$

1083 where

$$T = (0.3 + 1.5e^{-5\% \text{ATP}/100\%})(1 + 0.08[\text{C}^{\text{U}}]/\mu\text{M}).$$

1084 and  $H$  is the Heaviside function. The first part of the expression for the phosphorylation threshold,  $0.3 +$   
1085  $1.5e^{-5\% \text{ATP}/100\%}$ , describes how the threshold changes as a function of %ATP; the constants are determined  
1086 by approximating the  $[\text{KaiA}]$  threshold in **Figure 3A** as an exponential function. The second part of the  
1087 expression,  $1 + 0.08[\text{C}^{\text{U}}]/\mu\text{M}$ , describes how the threshold changes as a function of  $\text{C}^{\text{U}}$  concentration. This  
1088 formula is defined by

$$\frac{a/\mu\text{M} + b([\text{C}^{\text{U}}]/\mu\text{M} - 3.5)}{a/\mu\text{M} + b(-3.5)}$$

1089 where parameters  $a$  and  $b$  are determined by taking a linear fit,  $a + b[\text{AA}]$ , of the data from **Figure 3G** (yellow  
1090 line); that is,  $1 + 0.08[\text{C}^{\text{U}}]/\mu\text{M}$  gives the fractional changes to the phosphorylation threshold as a result of  
1091 any U phosphoform (in the form of AA phosphomimetic mutant) additional to the  $3.5 \mu\text{M}$  KaiC S431A in the  
1092 experiment.

1093 We use the original Phong model parameters in all analyses of the model with one exception. In the final  
1094 model with both a  $K_D$  and a phosphorylation threshold (**Figure 4E** bottom), the period is systematically  
1095 longer than 24 h due to a slow down in phosphorylation. To fix this problem, we change  $k_{ds}^A$  and  $k_{ds}^0$ , the  
1096 two rate constants controlling the  $D \rightarrow S$  transition, to  $0.94 k_{ds}^A$  and  $1.1 k_{ds}^0$ .

## 1097 References

- 1098 Abe, J., Hiyama, T. B., Mukaiyama, A., Son, S., Mori, T., Saito, S., Osako, M., Wolanin, J., Yamashita, E., Kondo, T. and Akiyama, S. (2015)  
1099 Atomic-scale origins of slowness in the cyanobacterial circadian clock. *Science*, **349**, 312–316.
- 1100 Bellman, R. and Åström, K. J. (1970) On structural identifiability. *Mathematical Biosciences*, **7**, 329–339.
- 1101 Beyer, H.-G. and Schwefel, H.-P. (2002) Evolution strategies – A comprehensive introduction. *Natural Computing*, **1**, 3–52.
- 1102 Brettschneider, C., Rose, R. J., Hertel, S., Axmann, I. M., Heck, A. J. R. and Kollmann, M. (2010) A sequestration feedback determines  
1103 dynamics and temperature entrainment of the KaiABC circadian clock. *Molecular Systems Biology*, **6**, 389.
- 1104 Brown, K. S. and Sethna, J. P. (2003) Statistical mechanical approaches to models with many poorly known parameters. *Physical Review*  
1105 *E*, **68**, 021904.
- 1106 Brown, S. A., Kowalska, E. and Dallmann, R. (2012) (Re)inventing the Circadian Feedback Loop. *Developmental Cell*, **22**, 477–487.
- 1107 Buchler, N. E. and Louis, M. (2008) Molecular Titration and Ultrasensitivity in Regulatory Networks. *Journal of Molecular Biology*, **384**,  
1108 1106–1119.
- 1109 Cao, Y., Wang, H., Ouyang, Q. and Tu, Y. (2015) The free-energy cost of accurate biochemical oscillations. *Nature Physics*, **11**, 772–778.
- 1110 Chang, Y.-G., Kuo, N.-W., Tseng, R. and LiWang, A. (2011) Flexibility of the C-terminal, or CII, ring of KaiC governs the rhythm of the  
1111 circadian clock of cyanobacteria. *Proceedings of the National Academy of Sciences*, **108**, 14431–14436.
- 1112 Chang, Y.-G., Tseng, R., Kuo, N.-W. and LiWang, A. (2012) Rhythmic ring–ring stacking drives the circadian oscillator clockwise. *Proceed-*  
1113 *ings of the National Academy of Sciences*, **109**, 16847–16851.
- 1114 Chew, J., Leypunskiy, E., Lin, J., Murugan, A. and Rust, M. J. (2018) High protein copy number is required to suppress stochasticity in the  
1115 cyanobacterial circadian clock. *Nature Communications*, **9**, 3004.
- 1116 Cobelli, C. and DiStefano, J. J. (1980) Parameter and structural identifiability concepts and ambiguities: A critical review and analysis.  
1117 *American Journal of Physiology-Regulatory, Integrative and Comparative Physiology*, **239**, R7–R24.
- 1118 Dalcín, L., Paz, R. and Storti, M. (2005) MPI for Python. *Journal of Parallel and Distributed Computing*, **65**, 1108–1115.
- 1119 Dalcín, L., Paz, R., Storti, M. and D'Elía, J. (2008) MPI for Python: Performance improvements and MPI-2 extensions. *Journal of Parallel*  
1120 *and Distributed Computing*, **68**, 655–662.
- 1121 Dalcin, L. D., Paz, R. R., Kler, P. A. and Cosimo, A. (2011) Parallel distributed computing using Python. *Advances in Water Resources*, **34**,  
1122 1124–1139.
- 1123 del Junco, C. and Vaikuntanathan, S. (2019) Robust oscillations in multi-cyclic models of biochemical clocks. *arXiv:1909.02534 [cond-mat,*  
1124 *physics:physics]*.
- 1125 Delaglio, F., Grzesiek, S., Vuister, G. W., Zhu, G., Pfeifer, J. and Bax, A. (1995) NMRPipe: A multidimensional spectral processing system  
1126 based on UNIX pipes. *Journal of Biomolecular NMR*, **6**, 277–293.
- 1127 Dovzhenok, A. A., Baek, M., Lim, S. and Hong, C. I. (2015) Mathematical Modeling and Validation of Glucose Compensation of the  
1128 *Neurospora* Circadian Clock. *Biophysical Journal*, **108**, 1830–1839.
- 1129 Edgar, R., Green, E., Zhao, Y., Van, O., Olmedo, M., Qin, X., Xu, Y., Pan, M., Valekunja, U., Feeney, K., Maywood, E., Hastings, M., Baliga, N.,  
1130 Merrow, M., Millar, A., Johnson, C., Kyriacou, C., O'Neill, J. and Reddy, A. (2012) Peroxiredoxins are conserved markers of circadian  
1131 rhythms. *Nature*, **485**, 459–464.
- 1132 Egli, M., Mori, T., Pattanayek, R., Xu, Y., Qin, X. and Johnson, C. H. (2012) Dephosphorylation of the Core Clock Protein KaiC in the  
1133 Cyanobacterial KaiABC Circadian Oscillator Proceeds via an ATP Synthase Mechanism. *Biochemistry*, **51**, 1547–1558.
- 1134 Eric Jones, Oliphant, T. E. and Pearu Peterson (2001) SciPy: Open Source Scientific Tools for Python.
- 1135 Eydgahi, H., Chen, W. W., Muhlich, J. L., Vitkup, D., Tsitsiklis, J. N. and Sorger, P. K. (2013) Properties of cell death models calibrated and  
1136 compared using Bayesian approaches. *Molecular Systems Biology*, **9**.
- 1137 Ferrell, J. E. and Ha, S. H. (2014a) Ultrasensitivity part I: Michaelian responses and zero-order ultrasensitivity. *Trends in Biochemical*  
1138 *Sciences*, **39**, 496–503.
- 1139 — (2014b) Ultrasensitivity part II: Multisite phosphorylation, stoichiometric inhibitors, and positive feedback. *Trends in Biochemical*  
1140 *Sciences*, **39**, 556–569.
- 1141 Flaherty, P., Radhakrishnan, M. L., Dinh, T., Rebres, R. A., Roach, T. I., Jordan, M. I. and Arkin, A. P. (2008) A Dual Receptor Crosstalk  
1142 Model of G-Protein-Coupled Signal Transduction. *PLOS Computational Biology*, **4**, e1000185.

- 1143 Foreman-Mackey, D., Hogg, D. W., Lang, D. and Goodman, J. (2013) Emcee: The MCMC Hammer. *Publications of the Astronomical Society of the Pacific*, **125**, 306.
- 1144
- 1145 Forger, D. B. and Peskin, C. S. (2003) A detailed predictive model of the mammalian circadian clock. *Proceedings of the National Academy of Sciences*, **100**, 14806–14811.
- 1146
- 1147 François, P., Despierre, N. and Siggia, E. D. (2012) Adaptive Temperature Compensation in Circadian Oscillations. *PLOS Computational Biology*, **8**, e1002585.
- 1148
- 1149 Fustin, J.-M., Kojima, R., Itoh, K., Chang, H.-Y., Ye, S., Zhuang, B., Oji, A., Gibo, S., Narasimamurthy, R., Virshup, D., Kurosawa, G., Doi, M., Manabe, I., Ishihama, Y., Ikawa, M. and Okamura, H. (2018) Two CK1 $\delta$  transcripts regulated by m6A methylation code for two antagonistic kinases in the control of the circadian clock. *Proceedings of the National Academy of Sciences*, **115**, 5980–5985.
- 1150
- 1151
- 1152 Gallego, M. and Virshup, D. M. (2007) Post-translational modifications regulate the ticking of the circadian clock. *Nature Reviews Molecular Cell Biology*, **8**, 139–148.
- 1153
- 1154 Geweke, J. (1989) Bayesian Inference in Econometric Models Using Monte Carlo Integration. *Econometrica*, **57**, 1317–1339.
- 1155
- 1156 Gomez-Uribe, C., Verghese, G. C. and Mirny, L. A. (2007) Operating Regimes of Signaling Cycles: Statics, Dynamics, and Noise Filtering. *PLOS Computational Biology*, **3**, e246.
- 1157
- 1158 Gonze, D., Halloy, J. and Goldbeter, A. (2002) Robustness of circadian rhythms with respect to molecular noise. *Proceedings of the National Academy of Sciences*, **99**, 673–678.
- 1159
- 1160 Goodman, J. and Weare, J. (2010) Ensemble samplers with affine invariance. *Communications in Applied Mathematics and Computational Science*, **5**, 65–80.
- 1161
- 1162 Gunawardena, J. (2005) Multisite protein phosphorylation makes a good threshold but can be a poor switch. *Proceedings of the National Academy of Sciences*, **102**, 14617–14622.
- 1163 — (2014) Models in biology: ‘accurate descriptions of our pathetic thinking’. *BMC Biology*, **12**, 29.
- 1164
- 1165 Gutenkunst, R. N., Waterfall, J. J., Casey, F. P., Brown, K. S., Myers, C. R. and Sethna, J. P. (2007) Universally Sloppy Parameter Sensitivities in Systems Biology Models. *PLOS Computational Biology*, **3**, e189.
- 1166
- 1167 Hatakeyama, T. S. and Kaneko, K. (2012) Generic temperature compensation of biological clocks by autonomous regulation of catalyst concentration. *Proceedings of the National Academy of Sciences*, **109**, 8109–8114.
- 1168
- 1169 Hayashi, F., Ito, H., Fujita, M., Iwase, R., Uzumaki, T. and Ishiura, M. (2004a) Stoichiometric interactions between cyanobacterial clock proteins KaiA and KaiC. *Biochemical and Biophysical Research Communications*, **316**, 195–202.
- 1170
- 1171 Hayashi, F., Itoh, N., Uzumaki, T., Iwase, R., Tsuchiya, Y., Yamakawa, H., Morishita, M., Onai, K., Itoh, S. and Ishiura, M. (2004b) Roles of Two ATPase-Motif-containing Domains in Cyanobacterial Circadian Clock Protein KaiC. *Journal of Biological Chemistry*, **279**, 52331–52337.
- 1172
- 1173 Hayashi, F., Iwase, R., Uzumaki, T. and Ishiura, M. (2006) Hexamerization by the N-terminal domain and intersubunit phosphorylation by the C-terminal domain of cyanobacterial circadian clock protein KaiC. *Biochemical and Biophysical Research Communications*, **348**, 864–872.
- 1174
- 1175
- 1176 Hayashi, F., Suzuki, H., Iwase, R., Uzumaki, T., Miyake, A., Shen, J.-R., Imada, K., Furukawa, Y., Yonekura, K., Namba, K. and Ishiura, M. (2003) ATP-induced hexameric ring structure of the cyanobacterial circadian clock protein KaiC. *Genes to Cells*, **8**, 287–296.
- 1177
- 1178 Heisler, J., Chavan, A., Chang, Y.-G. and LiWang, A. (2019) Real-Time In Vitro Fluorescence Anisotropy of the Cyanobacterial Circadian Clock. *Methods and Protocols*, **2**, 42.
- 1179
- 1180 Hong, L., Vani, B. P., Thiede, E. H., Rust, M. J. and Dinner, A. R. (2018) Molecular dynamics simulations of nucleotide release from the circadian clock protein KaiC reveal atomic-resolution functional insights. *Proceedings of the National Academy of Sciences*, 201812555.
- 1181
- 1182 Hou, F., Goodman, J., Hogg, D. W., Weare, J. and Schwab, C. (2012) An Affine-invariant Sampler for Exoplanet Fitting and Discovery in Radial Velocity Data. *The Astrophysical Journal*, **745**, 198.
- 1183
- 1184 Hug, S., Raue, A., Hasenauer, J., Bachmann, J., Klingmüller, U., Timmer, J. and Theis, F. J. (2013) High-dimensional Bayesian parameter estimation: Case study for a model of JAK2/STAT5 signaling. *Mathematical Biosciences*, **246**, 293–304.
- 1185
- 1186 Iwasaki, H., Nishiwaki, T., Kitayama, Y., Nakajima, M. and Kondo, T. (2002) KaiA-stimulated KaiC phosphorylation in circadian timing loops in cyanobacteria. *Proceedings of the National Academy of Sciences*, **99**, 15788–15793.
- 1187
- 1188 Jeong, Y. M., Dias, C., Diekman, C., Brochon, H., Kim, P., Kaur, M., Kim, Y.-S., Jang, H.-I. and Kim, Y.-I. (2019) Magnesium Regulates the Circadian Oscillator in Cyanobacteria. *Journal of Biological Rhythms*, 0748730419851655.
- 1189
- 1190 Johnson, C. H. and Egli, M. (2014) Metabolic Compensation and Circadian Resilience in Prokaryotic Cyanobacteria. *Annual Review of Biochemistry*, **83**, 221–247.
- 1191

- 1192 Johnson, C. H., Stewart, P. L. and Egli, M. (2011) The Cyanobacterial Circadian System: From Biophysics to Bioevolution. *Annual Review*  
1193 *of Biophysics*, **40**, 143–167.
- 1194 Jolley, C. C., Ode, K. L. and Ueda, H. R. (2012) A Design Principle for a Posttranslational Biochemical Oscillator. *Cell Reports*, **2**, 938–950.
- 1195 Kageyama, H., Nishiwaki, T., Nakajima, M., Iwasaki, H., Oyama, T. and Kondo, T. (2006) Cyanobacterial Circadian Pacemaker: Kai Protein  
1196 Complex Dynamics in the KaiC Phosphorylation Cycle In Vitro. *Molecular Cell*, **23**, 161–171.
- 1197 Kidd, P. B., Young, M. W. and Siggia, E. D. (2015) Temperature compensation and temperature sensation in the circadian clock. *Proceed-*  
1198 *ings of the National Academy of Sciences*, **112**, E6284–E6292.
- 1199 Kim, J. K. and Forger, D. B. (2012) A mechanism for robust circadian timekeeping via stoichiometric balance. *Molecular Systems Biology*,  
1200 **8**, 630.
- 1201 Kim, Y.-I., Dong, G., Carruthers, C. W., Golden, S. S. and LiWang, A. (2008) The day/night switch in KaiC, a central oscillator component  
1202 of the circadian clock of cyanobacteria. *Proceedings of the National Academy of Sciences*, **105**, 12825–12830.
- 1203 Kirkpatrick, S. (1984) Optimization by simulated annealing: Quantitative studies. *Journal of Statistical Physics*, **34**, 975–986.
- 1204 Kirkpatrick, S., Gelatt, C. D. and Vecchi, M. P. (1983) Optimization by Simulated Annealing. *Science*, **220**, 671–680.
- 1205 Kitayama, Y., Nishiwaki, T., Terauchi, K. and Kondo, T. (2008) Dual KaiC-based oscillations constitute the circadian system of cyanobac-  
1206 teria. *Genes & Development*, **22**, 1513–1521.
- 1207 Kitayama, Y., Nishiwaki-Ohkawa, T., Sugisawa, Y. and Kondo, T. (2013) KaiC intersubunit communication facilitates robustness of circa-  
1208 dian rhythms in cyanobacteria. *Nature Communications*, **4**, 2897.
- 1209 Klinke, D. J. (2009) An empirical Bayesian approach for model-based inference of cellular signaling networks. *BMC Bioinformatics*, **10**,  
1210 371.
- 1211 Lam, S. K., Pitrou, A. and Seibert, S. (2015) Numba: A LLVM-based Python JIT Compiler. In *Proceedings of the Second Workshop on the*  
1212 *LLVM Compiler Infrastructure in HPC, LLVM '15*, 7:1–7:6. New York, NY, USA: ACM.
- 1213 Langtangen, H. P. and Wang, L. (2015) Odespy software package.
- 1214 Leloup, J.-C. and Goldbeter, A. (2003) Toward a detailed computational model for the mammalian circadian clock. *Proceedings of the*  
1215 *National Academy of Sciences*, **100**, 7051–7056.
- 1216 Leloup, J.-C., Gonze, D. and Goldbeter, A. (1999) Limit Cycle Models for Circadian Rhythms Based on Transcriptional Regulation in  
1217 *Drosophila* and *Neurospora*. *Journal of Biological Rhythms*, **14**, 433–448.
- 1218 Leypunskiy, E., Lin, J., Yoo, H., Lee, U., Dinner, A. R. and Rust, M. J. (2017) The cyanobacterial circadian clock follows midday in vivo and  
1219 in vitro. *eLife*, **6**, e23539.
- 1220 Li, C., Chen, X., Wang, P. and Wang, W. (2009) Circadian KaiC Phosphorylation: A Multi-Layer Network. *PLOS Comput Biol*, **5**, e1000568.
- 1221 Lin, J., Chew, J., Chockanathan, U. and Rust, M. J. (2014) Mixtures of opposing phosphorylations within hexamers precisely time feedback  
1222 in the cyanobacterial circadian clock. *Proceedings of the National Academy of Sciences*, **111**, E3937–E3945.
- 1223 Locke, J. C. W., Millar, A. J. and Turner, M. S. (2005) Modelling genetic networks with noisy and varied experimental data: The circadian  
1224 clock in *Arabidopsis thaliana*. *Journal of Theoretical Biology*, **234**, 383–393.
- 1225 Ma, L. and Ranganathan, R. (2012) Quantifying the Rhythm of KaiB-C Interaction for In Vitro Cyanobacterial Circadian Clock. *PLOS ONE*,  
1226 **7**, e42581.
- 1227 Ma, W., Trusina, A., El-Samad, H., Lim, W. A. and Tang, C. (2009) Defining Network Topologies that Can Achieve Biochemical Adaptation.  
1228 *Cell*, **138**, 760–773.
- 1229 Machado, D., Costa, R. S., Rocha, M., Ferreira, E. C., Tidor, B. and Rocha, I. (2011) Modeling formalisms in Systems Biology. *AMB Express*,  
1230 **1**, 45.
- 1231 MacKay, D. J. C. and Kay, D. J. C. M. (2003) *Information Theory, Inference and Learning Algorithms*. Cambridge University Press.
- 1232 Madras, N. and Sokal, A. D. (1988) The pivot algorithm: A highly efficient Monte Carlo method for the self-avoiding walk. *Journal of*  
1233 *Statistical Physics*, **50**, 109–186.
- 1234 Mello, B. A., Pan, W., Hazelbauer, G. L. and Tu, Y. (2018) A dual regulation mechanism of histidine kinase CheA identified by combining  
1235 network-dynamics modeling and system-level input-output data. *PLOS Computational Biology*, **14**, e1006305.
- 1236 Mirsky, H. P., Liu, A. C., Welsh, D. K., Kay, S. A. and Doyle, F. J. (2009) A model of the cell-autonomous mammalian circadian clock.  
1237 *Proceedings of the National Academy of Sciences*, **106**, 11107–11112.
- 1238 Monti, M., Lubensky, D. K. and ten Wolde, P. R. (2018) Robustness of Clocks to Input Noise. *Physical Review Letters*, **121**, 078101.

- 1239 Mori, T., Sugiyama, S., Byrne, M., Johnson, C. H., Uchihashi, T. and Ando, T. (2018) Revealing circadian mechanisms of integration and  
1240 resilience by visualizing clock proteins working in real time. *Nature Communications*, **9**, 3245.
- 1241 Mukaiyama, A., Furuike, Y., Abe, J., Yamashita, E., Kondo, T. and Akiyama, S. (2018) Conformational rearrangements of the C1 ring in  
1242 KaiC measure the timing of assembly with KaiB. *Scientific Reports*, **8**, 8803.
- 1243 Murakami, R., Miyake, A., Iwase, R., Hayashi, F., Uzumaki, T. and Ishiura, M. (2008) ATPase activity and its temperature compensation of  
1244 the cyanobacterial clock protein KaiC. *Genes to Cells*, **13**, 387–395.
- 1245 Murakami, R., Mutoh, R., Ishii, K. and Ishiura, M. (2016) Circadian oscillations of KaiA-KaiC and KaiB-KaiC complex formations in an in  
1246 vitro reconstituted KaiABC clock oscillator. *Genes to Cells*, **21**, 890–900.
- 1247 Murayama, Y., Kori, H., Oshima, C., Kondo, T., Iwasaki, H. and Ito, H. (2017) Low temperature nullifies the circadian clock in cyanobacteria  
1248 through Hopf bifurcation. *Proceedings of the National Academy of Sciences*, **114**, 5641–5646.
- 1249 Mutoh, R., Nishimura, A., Yasui, S., Onai, K. and Ishiura, M. (2013) The ATP-Mediated Regulation of KaiB-KaiC Interaction in the  
1250 Cyanobacterial Circadian Clock. *PLOS ONE*, **8**, e80200.
- 1251 Nakajima, M., Imai, K., Ito, H., Nishiwaki, T., Murayama, Y., Iwasaki, H., Oyama, T. and Kondo, T. (2005) Reconstitution of Circadian  
1252 Oscillation of Cyanobacterial KaiC Phosphorylation in Vitro. *Science*, **308**, 414–415.
- 1253 Nelder, J. A. and Mead, R. (1965) A Simplex Method for Function Minimization. *The Computer Journal*, **7**, 308–313.
- 1254 Nishiwaki, T. and Kondo, T. (2012) Circadian Autodephosphorylation of Cyanobacterial Clock Protein KaiC Occurs via Formation of ATP  
1255 as Intermediate. *Journal of Biological Chemistry*, **287**, 18030–18035.
- 1256 Nishiwaki, T., Satomi, Y., Kitayama, Y., Terauchi, K., Kiyohara, R., Takao, T. and Kondo, T. (2007) A sequential program of dual phospho-  
1257 rylation of KaiC as a basis for circadian rhythm in cyanobacteria. *The EMBO Journal*, **26**, 4029–4037.
- 1258 Nishiwaki-Ohkawa, T., Kitayama, Y., Ochiai, E. and Kondo, T. (2014) Exchange of ADP with ATP in the CII ATPase domain promotes  
1259 autophosphorylation of cyanobacterial clock protein KaiC. *Proceedings of the National Academy of Sciences*, **111**, 4455–4460.
- 1260 Novák, B. and Tyson, J. J. (2008) Design principles of biochemical oscillators. *Nature Reviews Molecular Cell Biology*, **9**, 981–991.
- 1261 Oliphant, T. E. (2015) *Guide to NumPy*. USA: CreateSpace Independent Publishing Platform, 2nd edn.
- 1262 O'Neill, J. S., van Ooijen, G., Dixon, L. E., Troein, C., Corellou, F., Bouget, F.-Y., Reddy, A. B. and Millar, A. J. (2011) Circadian rhythms persist  
1263 without transcription in a eukaryote. *Nature*, **469**, 554–558.
- 1264 Pajjmans, J., Lubensky, D. K. and ten Wolde, P. R. (2017a) Period Robustness and Entrainability of the Kai System to Changing Nucleotide  
1265 Concentrations. *Biophysical Journal*, **113**, 157–173.
- 1266 Pajjmans, J., Lubensky, D. K. and ten Wolde, P. R. (2017b) A thermodynamically consistent model of the post-translational Kai circadian  
1267 clock. *PLOS Computational Biology*, **13**, e1005415.
- 1268 Pattanayek, R. and Egli, M. (2015) Protein–Protein Interactions in the Cyanobacterial Circadian Clock: Structure of KaiA Dimer in Com-  
1269 plex with C-Terminal KaiC Peptides at 2.8 Å Resolution. *Biochemistry*, **54**, 4575–4578.
- 1270 Pattanayek, R., Mori, T., Xu, Y., Pattanayek, S., Johnson, C. H. and Egli, M. (2009) Structures of KaiC Circadian Clock Mutant Proteins: A  
1271 New Phosphorylation Site at T426 and Mechanisms of Kinase, ATPase and Phosphatase. *PLOS ONE*, **4**, e7529.
- 1272 Pattanayek, R., Wang, J., Mori, T., Xu, Y., Johnson, C. H. and Egli, M. (2004) Visualizing a Circadian Clock Protein: Crystal Structure of KaiC  
1273 and Functional Insights. *Molecular Cell*, **15**, 375–388.
- 1274 Pett, J. P., Korenčič, A., Wesener, F., Kramer, A. and Herzel, H. (2016) Feedback Loops of the Mammalian Circadian Clock Constitute  
1275 Repressilator. *PLOS Computational Biology*, **12**, e1005266.
- 1276 Phong, C., Markson, J. S., Wilhoite, C. M. and Rust, M. J. (2013) Robust and tunable circadian rhythms from differentially sensitive  
1277 catalytic domains. *Proceedings of the National Academy of Sciences*, **110**, 1124–1129.
- 1278 Pittayakanchit, W., Lu, Z., Chew, J., Rust, M. J. and Murugan, A. (2018) Biophysical clocks face a trade-off between internal and external  
1279 noise resistance. *eLife*, **7**, e37624.
- 1280 Powell, M. J. D. (1964) An efficient method for finding the minimum of a function of several variables without calculating derivatives.  
1281 *The Computer Journal*, **7**, 155–162.
- 1282 Press, W. H., Teukolsky, S. A., Vetterling, W. T. and Flannery, B. P. (2007) *Numerical Recipes 3rd Edition: The Art of Scientific Computing*.  
1283 Cambridge, UK ; New York: Cambridge University Press, 3 edition edn.
- 1284 Pullen, N. and Morris, R. J. (2014) Bayesian Model Comparison and Parameter Inference in Systems Biology Using Nested Sampling.  
1285 *PLOS ONE*, **9**, e88419.



- 1286 Qin, X., Byrne, M., Mori, T., Zou, P., Williams, D. R., Mchaourab, H. and Johnson, C. H. (2010a) Intermolecular associations determine the  
1287 dynamics of the circadian KaiABC oscillator. *Proceedings of the National Academy of Sciences*, **107**, 14805–14810.
- 1288 Qin, X., Byrne, M., Xu, Y., Mori, T. and Johnson, C. H. (2010b) Coupling of a Core Post-Translational Pacemaker to a Slave Transcription/Translation Feedback Loop in a Circadian System. *PLoS Biol*, **8**, e1000394.
- 1290 Reischl, S. and Kramer, A. (2011) Kinases and phosphatases in the mammalian circadian clock. *FEBS Letters*, **585**, 1393–1399.
- 1291 Reischl, S., Vanselow, K., Westermark, P. O., Thierfelder, N., Maier, B., Herzel, H. and Kramer, A. (2007)  $\beta$ -TrCP1-Mediated Degradation  
1292 of PERIOD2 Is Essential for Circadian Dynamics. *Journal of Biological Rhythms*, **22**, 375–386.
- 1293 Relógio, A., Westermark, P. O., Wallach, T., Schellenberg, K., Kramer, A. and Herzel, H. (2011) Tuning the Mammalian Circadian Clock:  
1294 Robust Synergy of Two Loops. *PLoS Computational Biology*, **7**, e1002309.
- 1295 Rust, M. J., Golden, S. S. and O’Shea, E. K. (2011) Light-Driven Changes in Energy Metabolism Directly Entrain the Cyanobacterial  
1296 Circadian Oscillator. *Science*, **331**, 220–223.
- 1297 Rust, M. J., Markson, J. S., Lane, W. S., Fisher, D. S. and O’Shea, E. K. (2007) Ordered Phosphorylation Governs Oscillation of a Three-  
1298 Protein Circadian Clock. *Science*, **318**, 809–812.
- 1299 Sasai, M. (2019) Effects of Stochastic Single-Molecule Reactions on Coherent Ensemble Oscillations in the KaiABC Circadian Clock. *The  
1300 Journal of Physical Chemistry B*, **123**, 702–713.
- 1301 Schmid, D., Hug, S., Li, W. B., Greiter, M. B. and Theis, F. J. (2012) Bayesian model selection validates a biokinetic model for zirconium  
1302 processing in humans. *BMC Systems Biology*, **6**, 95.
- 1303 Schwarz, G. (1978) Estimating the Dimension of a Model. *The Annals of Statistics*, **6**, 461–464.
- 1304 Snijder, J., Schuller, J. M., Wiegard, A., Lössl, P., Schmelling, N., Axmann, I. M., Plitzko, J. M., Förster, F. and Heck, A. J. R. (2017) Structures  
1305 of the cyanobacterial circadian oscillator frozen in a fully assembled state. *Science*, **355**, 1181–1184.
- 1306 Swan, J. A., Golden, S. S., LiWang, A. and Partch, C. L. (2018) Structure, function, and mechanism of the core circadian clock in cyanobac-  
1307 teria. *Journal of Biological Chemistry*, **293**, 5026–5034.
- 1308 Terauchi, K., Kitayama, Y., Nishiwaki, T., Miwa, K., Murayama, Y., Oyama, T. and Kondo, T. (2007) ATPase activity of KaiC determines the  
1309 basic timing for circadian clock of cyanobacteria. *Proceedings of the National Academy of Sciences*, **104**, 16377–16381.
- 1310 Tibshirani, R. (1996) Regression Shrinkage and Selection via the Lasso. *Journal of the Royal Statistical Society. Series B (Methodological)*,  
1311 **58**, 267–288.
- 1312 Tomita, J., Nakajima, M., Kondo, T. and Iwasaki, H. (2005) No Transcription-Translation Feedback in Circadian Rhythm of KaiC Phospho-  
1313 rylation. *Science*, **307**, 251–254.
- 1314 Toni Tina, Welch David, Strelkova Natalja, Ipsen Andreas and Stumpf Michael P.H (2009) Approximate Bayesian computation scheme  
1315 for parameter inference and model selection in dynamical systems. *Journal of The Royal Society Interface*, **6**, 187–202.
- 1316 Towns, J., Cockerill, T., Dahan, M., Foster, I., Gauthier, K., Grimshaw, A., Hazlewood, V., Lathrop, S., Lifka, D., Peterson, G. D., Roskies, R.,  
1317 Scott, J. R. and Wilkins-Diehr, N. (2014) XSEDE: Accelerating Scientific Discovery. *Computing in Science & Engineering*, **16**, 62–74.
- 1318 Transtrum, M. K. and Qiu, P. (2014) Model Reduction by Manifold Boundaries. *Physical Review Letters*, **113**, 098701.
- 1319 Tseng, R., Chang, Y.-G., Bravo, I., Latham, R., Chaudhary, A., Kuo, N.-W. and LiWang, A. (2014) Cooperative KaiA–KaiB–KaiC Interactions  
1320 Affect KaiB/SasA Competition in the Circadian Clock of Cyanobacteria. *Journal of Molecular Biology*, **426**, 389–402.
- 1321 Tseng, R., Goularte, N. F., Chavan, A., Luu, J., Cohen, S. E., Chang, Y.-G., Heisler, J., Li, S., Michael, A. K., Tripathi, S., Golden, S. S., LiWang,  
1322 A. and Partch, C. L. (2017) Structural basis of the day-night transition in a bacterial circadian clock. *Science*, **355**, 1174–1180.
- 1323 Vakonakis, I. and LiWang, A. C. (2004) Structure of the C-terminal domain of the clock protein KaiA in complex with a KaiC-derived  
1324 peptide: Implications for KaiC regulation. *Proceedings of the National Academy of Sciences of the United States of America*, **101**, 10925–  
1325 10930.
- 1326 Vakonakis, I., Risinger, A. T., Latham, M. P., Williams, S. B., Golden, S. S. and LiWang, A. C. (2001) Letter to the Editor: Sequence-  
1327 specific <sup>1</sup>H, <sup>13</sup>C and <sup>15</sup>N resonance assignments of the N-terminal, 135-residue domain of KaiA, a clock protein from *Synechococcus*  
1328 *elongatus*. *Journal of Biomolecular NMR*, **21**, 179–180.
- 1329 Villaverde, A. F. and Banga, J. R. (2014) Reverse engineering and identification in systems biology: Strategies, perspectives and chal-  
1330 lenges. *Journal of The Royal Society Interface*, **11**, 20130505.
- 1331 Vyshemirsky, V. and Girolami, M. A. (2008) Bayesian ranking of biochemical system models. *Bioinformatics*, **24**, 833–839.
- 1332 Wasserman, L. (2000) Bayesian Model Selection and Model Averaging. *Journal of Mathematical Psychology*, **44**, 92–107.

- 1333 Williams, S. B., Vakonakis, I., Golden, S. S. and LiWang, A. C. (2002) Structure and function from the circadian clock protein KaiA of  
1334 *Synechococcus elongatus*: A potential clock input mechanism. *Proceedings of the National Academy of Sciences*, **99**, 15357–15362.
- 1335 Wu, P., Cheng, C., Kaddi, C. D., Venugopalan, J., Hoffman, R. and Wang, M. D. (2017) –Omic and Electronic Health Record Big Data  
1336 Analytics for Precision Medicine. *IEEE Transactions on Biomedical Engineering*, **64**, 263–273.
- 1337 Xu, T.-R., Vyshemirsky, V., Gormand, A., von Kriegsheim, A., Girolami, M., Baillie, G. S., Ketley, D., Dunlop, A. J., Milligan, G., Houslay, M. D.  
1338 and Kolch, W. (2010) Inferring Signaling Pathway Topologies from Multiple Perturbation Measurements of Specific Biochemical  
1339 Species. *Science Signaling*, **3**, ra20–ra20.
- 1340 Xu, Y., Mori, T. and Johnson, C. H. (2003) Cyanobacterial circadian clockwork: Roles of KaiA, KaiB and the kaiBC promoter in regulating  
1341 KaiC. *The EMBO Journal*, **22**, 2117–2126.
- 1342 Xu, Y., Mori, T., Pattanayek, R., Pattanayek, S., Egli, M. and Johnson, C. H. (2004) Identification of key phosphorylation sites in the  
1343 circadian clock protein KaiC by crystallographic and mutagenetic analyses. *Proceedings of the National Academy of Sciences of the  
1344 United States of America*, **101**, 13933–13938.
- 1345 Yoda, M., Eguchi, K., Terada, T. P. and Sasai, M. (2007) Monomer-Shuffling and Allosteric Transition in KaiC Circadian Oscillation. *PLOS  
1346 ONE*, **2**, e408.
- 1347 Yoshida, T., Murayama, Y., Ito, H., Kageyama, H. and Kondo, T. (2009) Nonparametric entrainment of the in vitro circadian phosphory-  
1348 lation rhythm of cyanobacterial KaiC by temperature cycle. *Proceedings of the National Academy of Sciences*, **106**, 1648–1653.
- 1349 Yunoki, Y., Ishii, K., Yagi-Utsumi, M., Murakami, R., Uchiyama, S., Yagi, H. and Kato, K. (2019) ATP hydrolysis by KaiC promotes its KaiA  
1350 binding in the cyanobacterial circadian clock system. *Life Science Alliance*, **2**, e201900368.
- 1351 Zhou, M., Kim, J. K., Eng, G. W. L., Forger, D. B. and Virshup, D. M. (2015) A Period2 Phosphoswitch Regulates and Temperature Com-  
1352 pensates Circadian Period. *Molecular Cell*, **60**, 77–88.
- 1353 van Zon, J. S., Lubensky, D. K., Altena, P. R. H. and ten Wolde, P. R. (2007) An allosteric model of circadian KaiC phosphorylation.  
1354 *Proceedings of the National Academy of Sciences*, **104**, 7420–7425.
- 1355 Zwanzig, R. W. (1954) High-Temperature Equation of State by a Perturbation Method. I. Nonpolar Gases. *The Journal of Chemical Physics*,  
1356 **22**, 1420–1426.
- 1357 Zwicker, D., Lubensky, D. K. and ten Wolde, P. R. (2010) Robust circadian clocks from coupled protein-modification and transcrip-  
1358 tion–translation cycles. *Proceedings of the National Academy of Sciences*, **107**, 22540–22545.

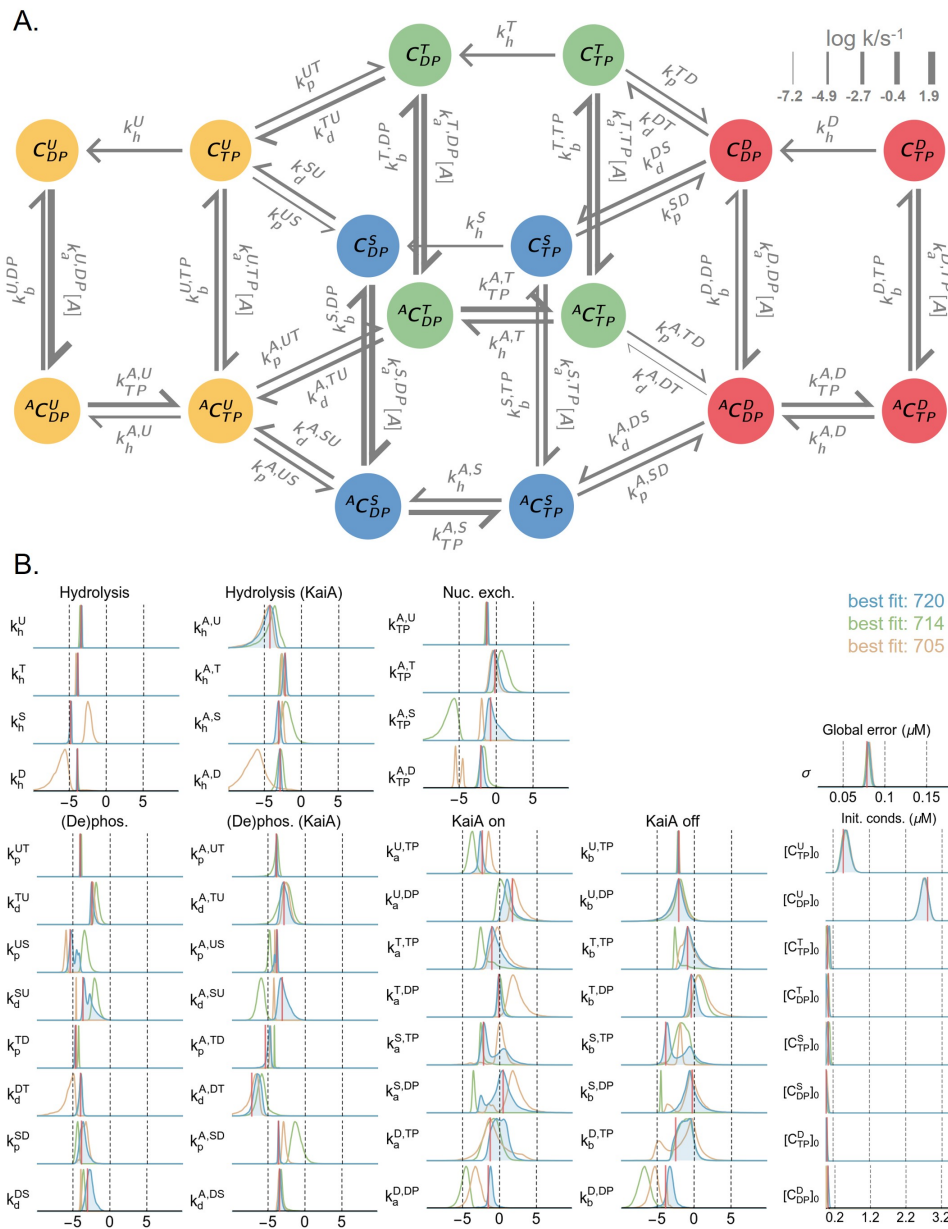

**Figure S1:** Overview of the model. A) A schematic of the full mass action kinetic model. Here, each arrow represents a reaction, and the associated rate constant is represented using the notation introduced in the main text. The thickness of the arrows is proportional to the best fit rate constant on a log scale (base 10) at 100% ATP and  $1.5 \mu\text{M}$  KaiA. B) The posterior distributions for all rate constants, initial conditions, and the global error hyperparameter. The rate constants have the unit  $\text{s}^{-1} \cdot (\mu\text{M})^{-1}$  and the horizontal axis has a log scale (base 10). The three distributions represent the results from three independent runs; the log posterior values for the best fits from the three runs are listed. The red lines represent the best fit from the best run (i.e., the blue distributions). See Materials and Methods and **Figure S10** for further details on the model parameterization method.

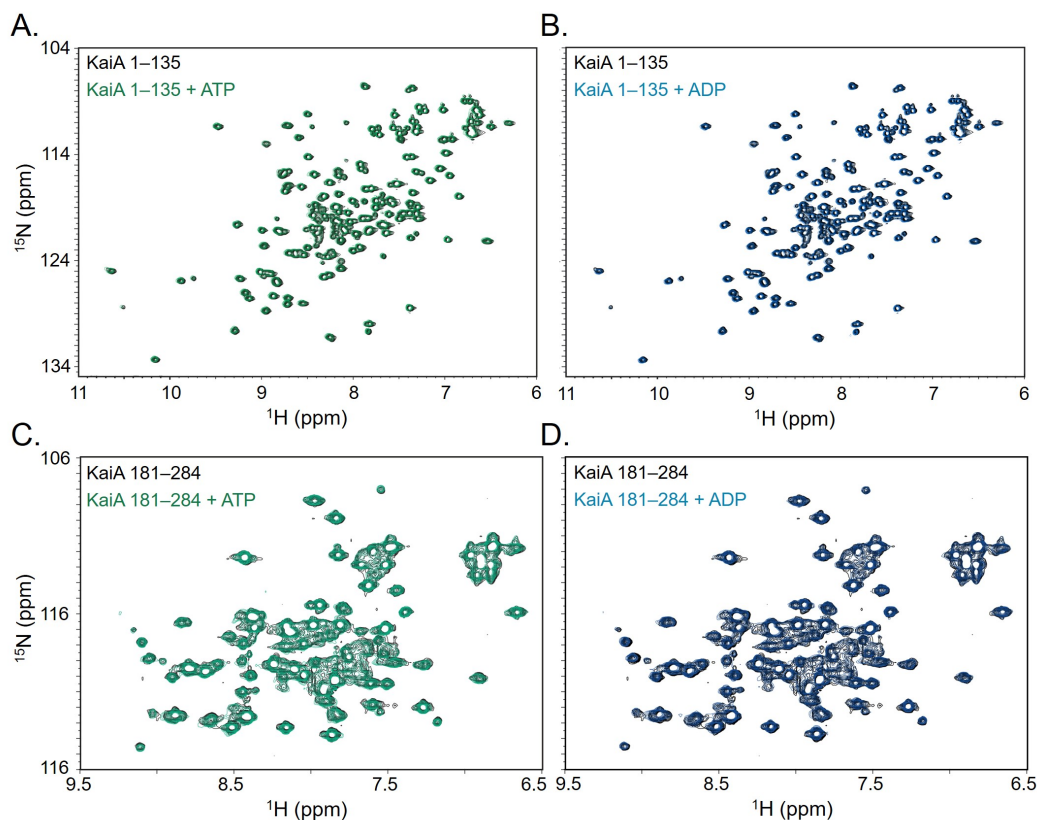

**Figure S2:** No evidence of direct nucleotide-KaiA interaction.  $^1\text{H}$ - $^{15}\text{N}$  HSQC spectroscopy of the N-terminal fragment (residues 1-135) of KaiA in the presence and absence of ATP (A) or ADP (B) show no significant differences in chemical shifts, while spectra of the C-terminal fragment (residues 181-284) show subtle line broadening in the presence of ATP (C) and ADP (D), suggesting weak, if any, interaction between the nucleotide and the C-terminal fragment. Given these results, we do not include any direct KaiA-nucleotide interaction in the model.

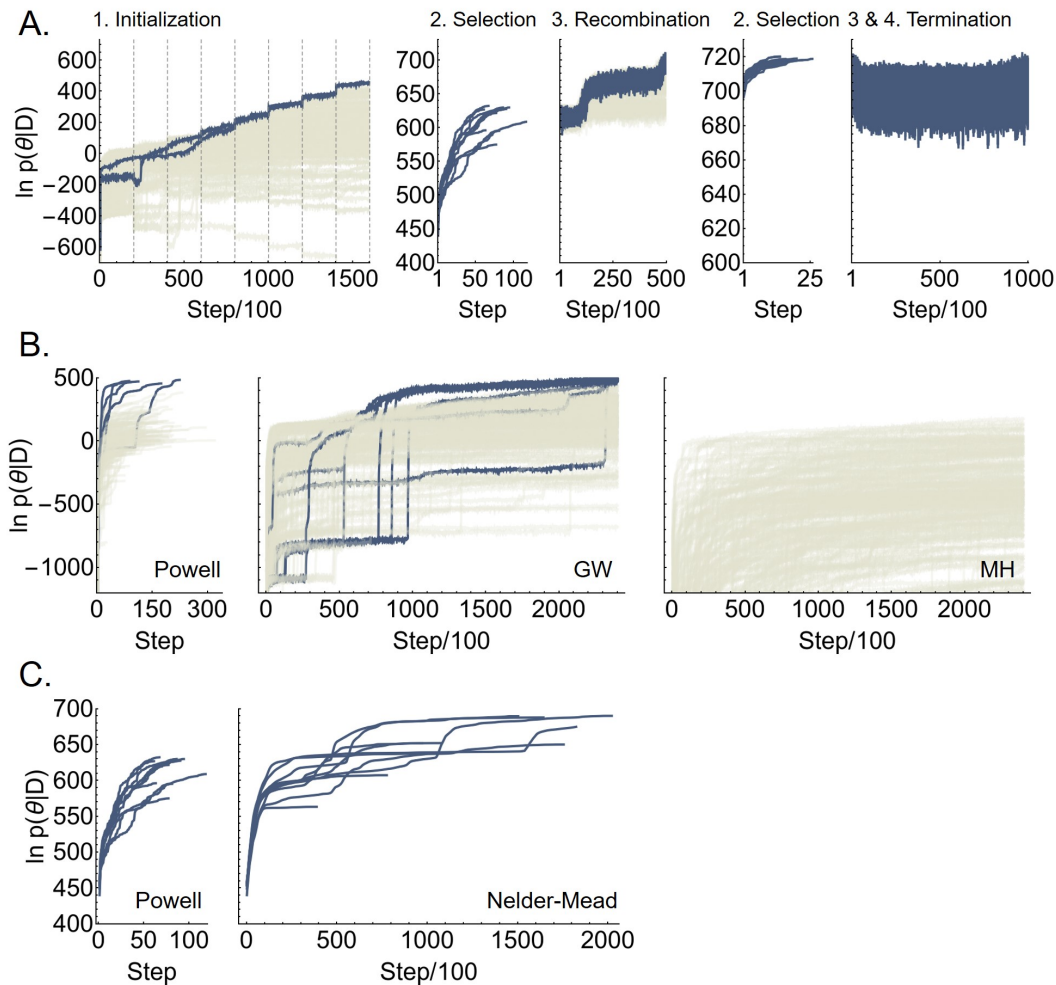

**Figure S3:** Performance of the fitting procedure. A) The time evolution of the log posterior values over the four steps of the fitting procedure (see Materials and Methods). For step 1 and 3, the individual Markov chains that do not produce walkers used in the next step are shown in beige. B) A comparison of the performance of Powell's method, a derivative-free numerical optimization method, Goodman-Weare (GM), an ensemble MCMC method, and conventional Metropolis-Hastings (MH) algorithm with a Gaussian trial distribution. For the Metropolis-Hastings algorithm the covariance matrix of the trial distribution is given by the global covariance of the fit (i.e., the last step in panel A), scaled by a factor of 0.005 to give an average acceptance rate of 19.8%. A set of 224 walkers drawn from the prior distribution are used to initialize the simulations for all three methods; the 224 walkers are evolved independently for Powell's method and Metropolis-Hastings, and in an ensemble for Goodman-Weare. Chains that do not reach log posterior above 450 are shown in beige. C) A comparison of the performance of Powell's method with Nelder-Mead, a simplex-based numerical optimization method. The simulations are initialized using the same walkers as in step 2 of A).

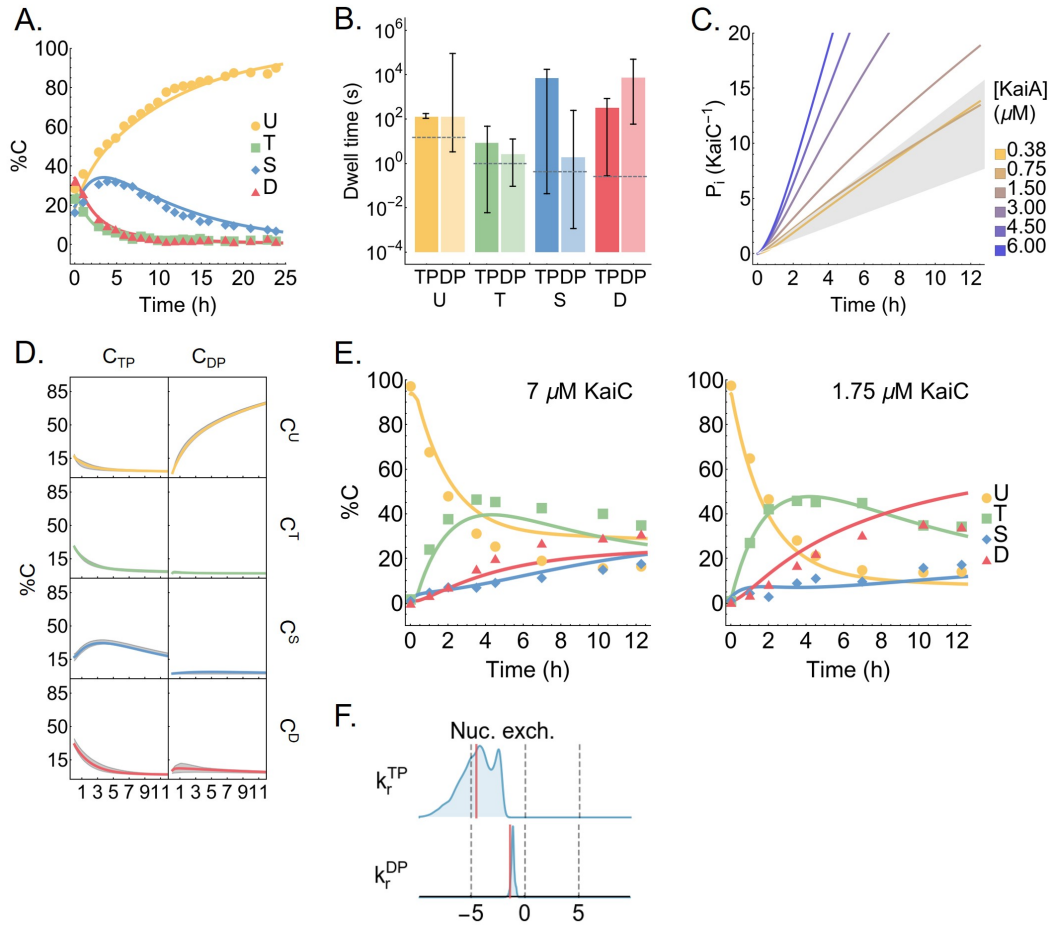

**Figure S4:** Behavior of the model. A) Model fit to the dephosphorylation dataset. B) The best fit KaiA dwell time as a function of KaiC phosphoform and nucleotide-bound state. The error bars represent the 95% posterior interval, and the dashed lines represent the experimental measurements, which did not resolve the nucleotide-bound states. C) Inorganic phosphate production per KaiC monomer over the course of a phosphorylation reaction. The gray region represents the experimental bounds on the KaiC hydrolysis rate with 1.2 μM KaiA and no KaiA. See Materials and Methods for the source of the experimental data in A–C. D) The kinetics of the dephosphorylation reaction in the absence of KaiA, broken down into the eight individual KaiC species. The gray region represents the 95% posterior interval. Refer to **Figure S1A** for the KaiC state names. E) The predicted phosphorylation kinetics at 7 and 1.75 μM KaiC, both at 100% ATP and 1.5 μM KaiA, compared to experimental measurements. Note that these two time series are not part of the training set. F) The posterior distributions for  $k_r^{TP}$  and  $k_r^{DP}$ , the dissociation rates for ATP and ADP, respectively, in an early iteration of the model. The rate constants have a unit of s<sup>-1</sup> and the horizontal axis has a log scale (base 10). The long tail to the left of the posterior distribution for  $k_r^{TP}$  suggests that the model can be simplified by setting the rate to zero.

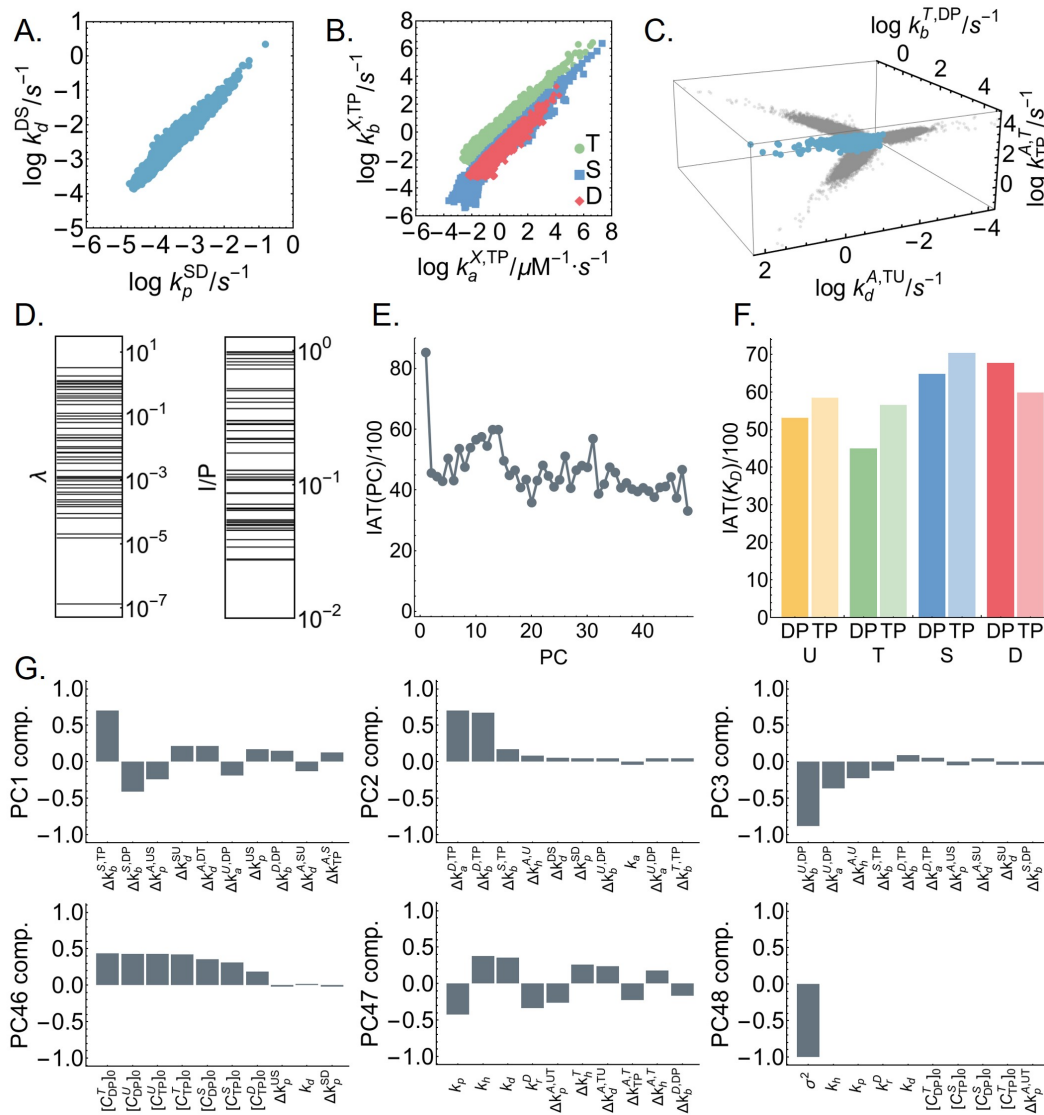

**Figure S5:** Correlation structure in the MCMC ensemble. A), B), and C) show parameters with a correlation coefficients larger than 0.9. In B), “X” represents the KaiC phosphoforms. In C), the projections of the 3D scatter plot onto pairwise correlations are shown in gray. D) The principal component/eigenvalue spectrum of the covariance matrix (left), and the alignment of the principal components with the coordinates (right). Here,  $I$  denotes the intersection of the principal component ellipsoid with the coordinates and  $P$  denotes the projection of the principal components onto the corresponding coordinates (Gutenkunst et al., 2007). E) The integrated autocorrelation time for the 48 principal components (PC); the principal components are indexed from the largest to the smallest. The integrated autocorrelation time is calculated using an automated windowing procedure (Madras and Sokal, 1988) from the autocorrelation function averaged over the ensemble. F) The integrated autocorrelation time for the KaiA dissociation constants as a function of KaiC phosphoform and nucleotide-bound states. G) The ten largest vector components, ordered by absolute value, for the first and last three principal components.

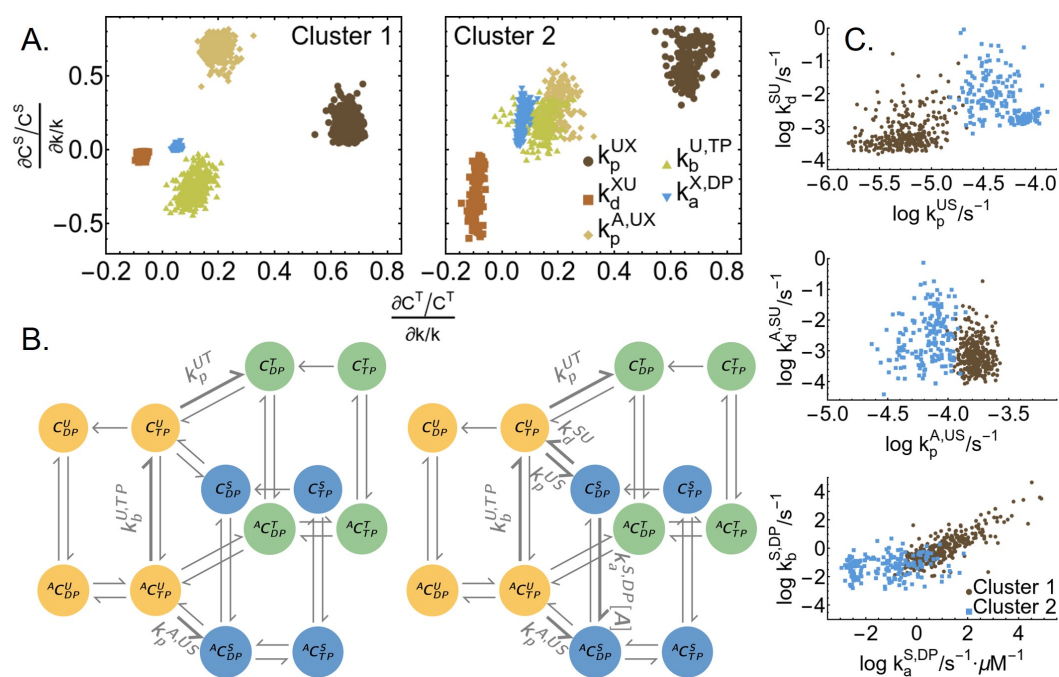

**Figure S6:** The mechanism of kinetic ordering is not well-constrained. A) Spectral clustering on the relative sensitivity of the T and S phosphoform concentrations at  $t = 1$  h to rate constants in the T- and S-site models, respectively. Only the parameters with significant ( $> 0.2$ ) relative sensitivities in either cluster are shown in the plot. “X” stands for either the T (horizontal axis) or S (vertical axis) phosphoform. The sensitivities are calculated using 500 sampled parameter sets chosen randomly from the ensemble. The clustering analysis was done using the FindClusters function in Mathematica 12.0. B) Model diagrams that highlight the reactions that have the highest relative sensitivities in the first (left) and second (right) clusters; the D phosphoform is not shown. C) Selected model parameter values in the two clusters. A comparison with blue distributions in **Figure S1B** indicates that the clustering based on sensitivity can be mapped onto the modes of the posterior distribution.



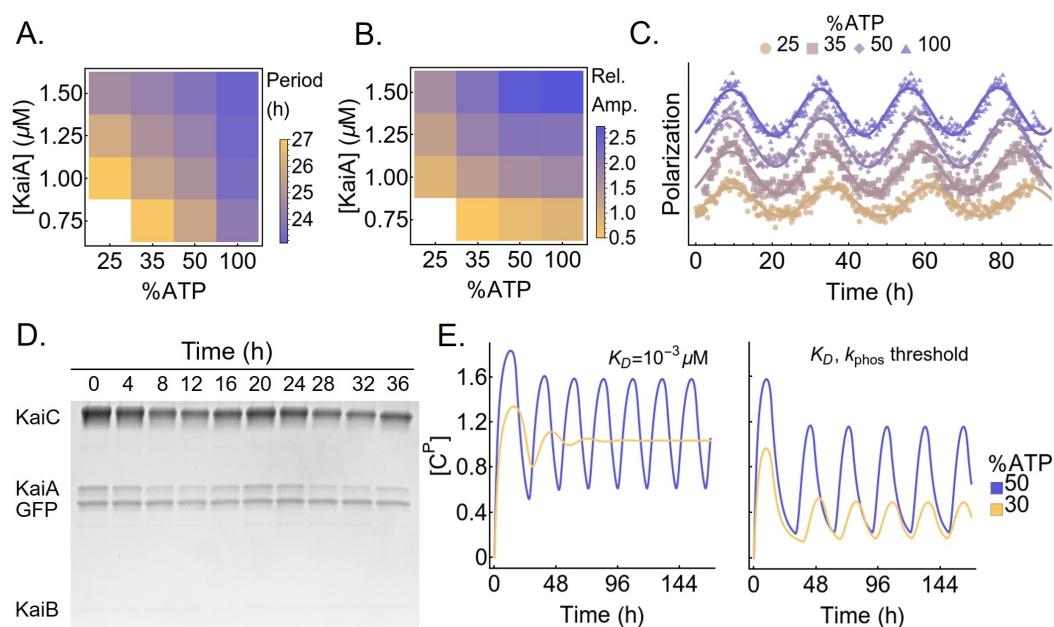

**Figure S7:** The metabolic compensation property of the Kai oscillator. The fluorescence polarization measurement of the oscillatory reactions are fit to a curve  $FP(t) = A \cos(2\pi T^{-1}t + \phi) + bt + c$  to extract A) the period ( $T$ ) and B) the normalized amplitude ( $100A/c$ ; dimensionless) of the oscillator as a function of [KaiA] and %ATP. Reactions with an amplitude  $A < 0.5$  are considered to be non-oscillatory. C) Representative traces demonstrating the effect of %ATP at 1.25 μM KaiA; The polarization data are shifted vertically to avoid overlaps and horizontally to align the first peaks. D) SDS-PAGE gel image of the supernatant from the KaiB-FLAG immunoprecipitation experiment. E) A Comparison of the metabolic compensation property of the Phong model without (left) or with (right) a phosphorylation threshold at  $K_D = 10^{-3} \mu\text{M}$ . The model exhibits phase decoherence at low %ATP without a phosphorylation threshold.

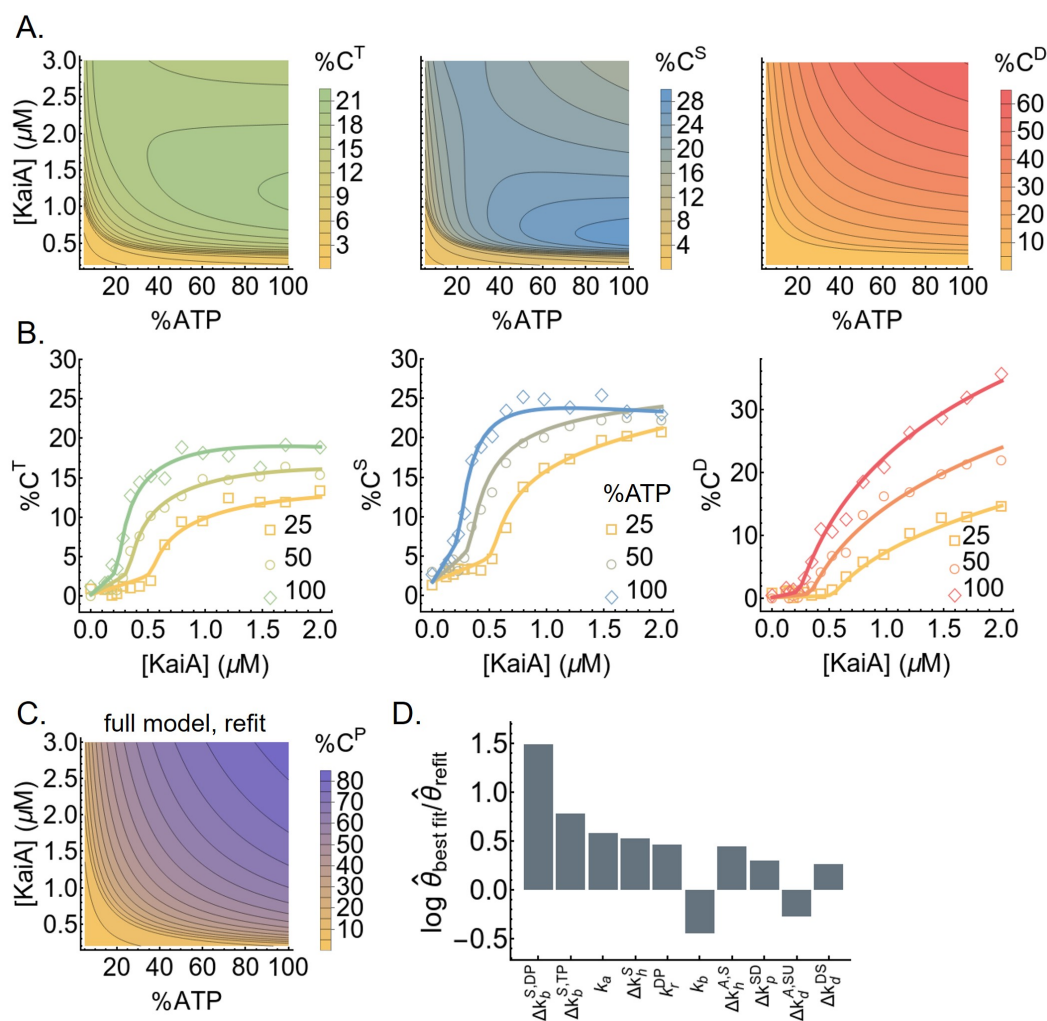

**Figure S8:** KaiC stimulus-response relations. A) The steady-state stimulus-response relations for T, S, and D phosphoforms predicted by the model. B) The experimentally determined stimulus-response functions of the T, S, and D phosphoforms at three %ATP conditions; the curves are based on refitting the best fit to the steady-state measurements. C) The model-predicted stimulus-response relation of the total steady-state KaiC phosphorylation level as a function of %ATP and [KaiA] after refitting to the steady-state measurements. D) The differences in the log parameter values (base 10) of the best fit before and after refit. The differences are ordered by magnitude and only the 10 parameters (in the multiplicative-factor scheme) with the largest changes are shown.

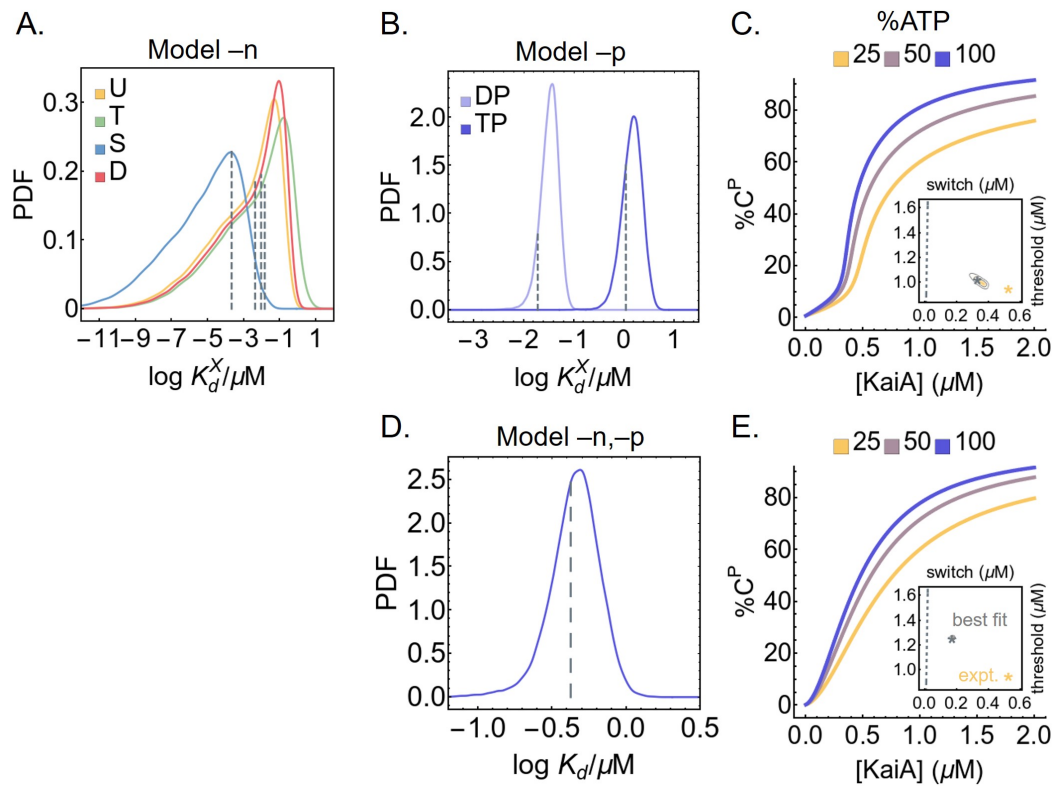

**Figure S9:** KaiA binding affinities of simplified models. A) The posterior distributions for the KaiA dissociation constants as a function of KaiC phosphoform in model -n, where the KaiA on/off rates are decoupled from the nucleotide-bound states of KaiC. The dashed lines represent the best fit. B) The posterior distributions for the KaiA dissociation constants as a function of KaiC phosphoform in model -p, where the KaiA on/off rates are decoupled from the KaiC phosphoform; the dashed lines represent the best fit. C) Cross sections of the stimulus-response relation at three %ATP, computed using model -p. The inset represents posterior distribution for the shapes of the stimulus-response function at 25% ATP. The contours represent the 68% and 95% HDRs, and the gray star represents the model best fit. The shape of the stimulus-response function is quantified using two metrics: EC10, which quantifies threshold-like behavior, and EC90 - EC10, which quantifies switch-like behavior. The shape of the experimentally-determined stimulus-response function at 25% ATP is shown as the yellow star. The dashed line represents  $(\text{EC}10, \text{EC}90 - \text{EC}10) = (K/9, 80K/9)$ , which characterizes the shape of a hyperbolic stimulus-response function  $[A]/(K + [A])$  that has no switching or thresholding. D) Similar to B), but for model -n,-p, where there is a single KaiA on/off rate in the model. E) Similar to C), but for model -n,-p.

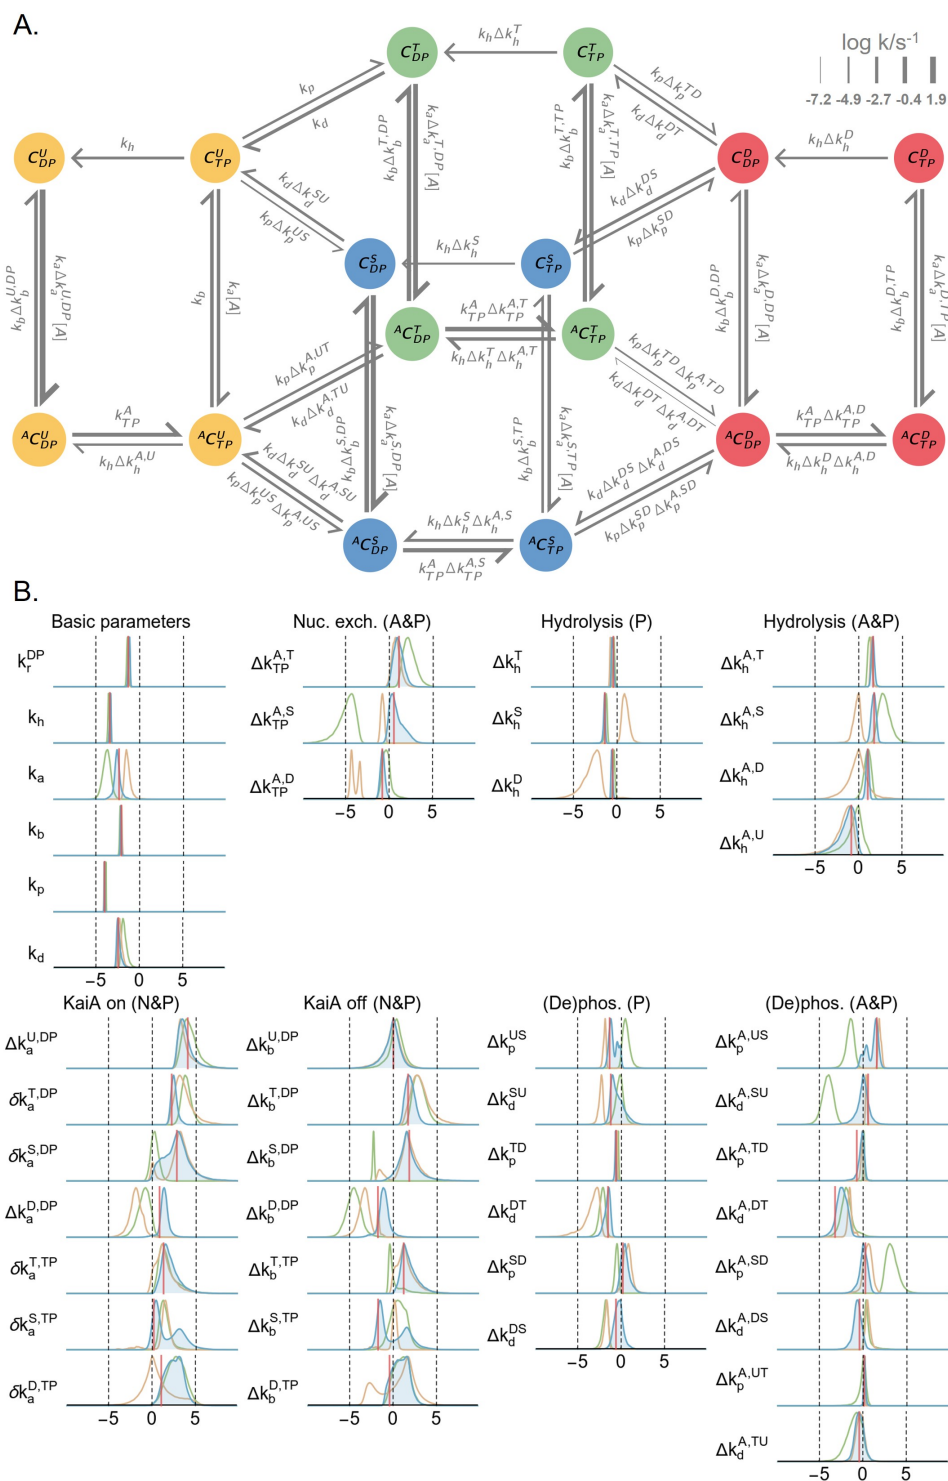

**Figure S10:** Overview of the model with the multiplicative-factor parameterization scheme. Panels A) and B) are analogous to those in **Figure S1**, but the rate constants are represented as products of the factors that are actually optimized in the MCMC simulations. In B), the  $\delta k$  parameters are fixed parameters determined by detailed balance conditions. The parentheses denote species-dependent effects; A: KaiA-bound state, P: phosphoform, N: nucleotide-bound state. See Materials and Methods for further description of the detailed balance conditions and the model parameterization method.
